# Supplementary material for: Uncovering codon usage patterns during murine embryogenesis and tissue-specific developmental diseases
Source: Front Genet. 2025 May 26;16:1554773. doi: 10.3389/fgene.2025.1554773 (PMC12146342; doi:10.3389/fgene.2025.1554773)
Supplement: Supplementary file 1 [file Table2.xlsx]

## Sheet: NLW_DLW_C57BL6
	stat	pvalues	alpha	new_pvalues	bonf_alpha			Effect Sizes	E12	E13	E14	E15	E16	E17	E18			Table Legend:
Ala:GCA	196	0	0.05	0	0.05			GCA:Ala			-0.171882			-0.2887				Comparisons are shown as their acronym. For examle, healthy (normal) liver weighted samples are labelled as ‘NLW’ and diseased liver weighted samples are labelled as ‘DLW’.
GCC	3	0	0.05	0	0.05			GCC:Ala			0.116246			0.162572				stat' is the statistic value.
GCG	196	0	0.05	0	0.05			GCG:Ala			-0.101138			-0.146959				pvalues' are the raw pvalues.
GCT	0	0	0.05	0	0.05			GCT:Ala			0.156791			0.273666				alpha' are the raw alpha values.
Arg:AGA	132	0.125092	0.05	0.125092	0.05			AGA:Arg			-0.0929259			-0.079349				new_pvalues' are the adjusted pvalues.
AGG	14.5	3.4e-05	0.05	3.4e-05	0.05			AGG:Arg			0.277938			0.332894				bonf_alpha' are the adjusted alpha values.
CGA	196	0	0.05	0	0.05			CGA:Arg			-0.14507			-0.275212
CGC	178	7.8e-05	0.05	7.8e-05	0.05			CGC:Arg			-0.120128			-0.24589				Averge RSCU and standard deviation can be found here.
CGG	193.5	0	0.05	0	0.05			CGG:Arg			-0.0781966			-0.267581
CGT	4	1e-06	0.05	1e-06	0.05			CGT:Arg			0.157589			0.523805
Asn:AAC	163	0.002078	0.05	0.002078	0.05			AAC:Asn			-0.0275795			-0.0911692					C57BL/6N
AAT	34.5	0.002963	0.05	0.002963	0.05			AAT:Asn			0.0275795			0.0911692					CD-1
Asp:GAC	196	0	0.05	0	0.05			GAC:Asp			-0.109716			-0.202769					C57BL/6J
GAT	0	0	0.05	0	0.05			GAT:Asp			0.109716			0.202769					C57BL/6
Cys:TGC	37	0.004162	0.05	0.004162	0.05			TGC:Cys			0.00628778			0.0808986
TGT	159	0.004162	0.05	0.004162	0.05			TGT:Cys			-0.00628778			-0.0808986
Gln:GAA	14	2.5e-05	0.05	2.5e-05	0.05			GAA:Glu			0.0236446			0.110966
GAG	183	1.9e-05	0.05	1.9e-05	0.05			GAG:Glu			-0.0236446			-0.110966
Glu:CAA	179	6e-05	0.05	6e-05	0.05			CAA:Gln			-0.0566617			-0.114598				Table S2: Average Relative Synonymous Codon Usage (RSCU), Standard Deviation, and Statistical Analyses for Tissue Weighted Mouse Strains and Their Embryonic Stages.
CAG	17	6e-05	0.05	6e-05	0.05			CAG:Gln			0.0566617			0.114598
Gly:GGA	190	1e-06	0.05	1e-06	0.05			GGA:Gly			-0.0971219			-0.185334
GGC	3	0	0.05	0	0.05			GGC:Gly			0.141255			0.132466
GGG	196	0	0.05	0	0.05			GGG:Gly			-0.159937			-0.250793
GGT	0	0	0.05	0	0.05			GGT:Gly			0.115831			0.303642
His:CAC	0	0	0.05	0	0.05			CAC:His			0.0718707			0.102362
CAT	196	0	0.05	0	0.05			CAT:His			-0.0718707			-0.102362
Ile:ATA	17.5	7.8e-05	0.05	7.8e-05	0.05			ATA:Ile			0.0475497			0.0444884
ATC	153	0.0106	0.05	0.0106	0.05			ATC:Ile			-0.0374784			-0.0955975
ATT	97.5	1	0.05	1	0.05			ATT:Ile			-0.0100428			0.0513067
Leu:CTA	168	0.000794	0.05	0.000794	0.05			CTA:Leu			-0.0482344			-0.113036
CTC	181.5	3.4e-05	0.05	3.4e-05	0.05			CTC:Leu			-0.0283924			-0.152176
CTG	0	0	0.05	0	0.05			CTG:Leu			0.37855			0.655204
CTT	196	0	0.05	0	0.05			CTT:Leu			-0.153558			-0.232842
TTA	181.5	3.4e-05	0.05	3.4e-05	0.05			TTA:Leu			-0.0547199			-0.0714262
TTG	189.5	2e-06	0.05	2e-06	0.05			TTG:Leu			-0.0951632			-0.0948443
Lys:AAA	196	0	0.05	0	0.05			AAA:Lys			-0.0986056			-0.193061
AAG	0	0	0.05	0	0.05			AAG:Lys			0.0986056			0.193061
Phe:TTC	178	7.8e-05	0.05	7.8e-05	0.05			TTC:Phe			-0.0498303			-0.0873758
TTT	18	7.8e-05	0.05	7.8e-05	0.05			TTT:Phe			0.0498303			0.0873758
Pro:CCA	180	4.5e-05	0.05	4.5e-05	0.05			CCA:Pro			-0.123842			-0.279298
CCC	1	0	0.05	0	0.05			CCC:Pro			0.144833			0.431371
CCG	196	0	0.05	0	0.05			CCG:Pro			-0.102715			-0.258696
CCT	12	1.4e-05	0.05	1.4e-05	0.05			CCT:Pro			0.08162			0.10415
Ser:AGC	0	0	0.05	0	0.05			AGC:Ser			0.292897			0.703144
AGT	196	0	0.05	0	0.05			AGT:Ser			-0.0984264			-0.329522
TCA	196	0	0.05	0	0.05			TCA:Ser			-0.194147			-0.327955
TCC	195	0	0.05	0	0.05			TCC:Ser			-0.13531			-0.30998
TCG	195	0	0.05	0	0.05			TCG:Ser			-0.0911355			-0.237773
TCT	0	0	0.05	0	0.05			TCT:Ser			0.225113			0.489341
Thr:ACA	192.5	1e-06	0.05	1e-06	0.05			ACA:Thr			-0.169096			-0.31488
ACC	4	1e-06	0.05	1e-06	0.05			ACC:Thr			0.266965			0.527197
ACG	171	0.000421	0.05	0.000421	0.05			ACG:Thr			-0.0570922			-0.123455
ACT	163.5	0.002078	0.05	0.002078	0.05			ACT:Thr			-0.0421796			-0.0984595
Tyr:TAC	19	0.000101	0.05	0.000101	0.05			TAC:Tyr			0.0875749			0.0554547
TAT	177	0.000101	0.05	0.000101	0.05			TAT:Tyr			-0.0875749			-0.0554547
Val:GTA	193	0	0.05	0	0.05			GTA:Val			-0.0635964			-0.0894344
GTC	193	0	0.05	0	0.05			GTC:Val			-0.0760501			-0.131881
GTG	0	0	0.05	0	0.05			GTG:Val			0.179384			0.274382
GTT	139	0.062042	0.05	0.062042	0.05			GTT:Val			-0.0399253			-0.0535806

## Sheet: NLW_DLW_C57BL6J
	stat	pvalues	alpha	new_pvalues	bonf_alpha			Effect Sizes	E15
Ala:GCA	49	0.000583	0.05	0.000583	0.05			GCA:Ala	-0.0877594
GCC	1	0.001166	0.05	0.001166	0.05			GCC:Ala	0.0741082
GCG	39	0.072844	0.05	0.072844	0.05			GCG:Ala	-0.00226344
GCT	0	0.000583	0.05	0.000583	0.05			GCT:Ala	0.0159069
Arg:AGA	39	0.072844	0.05	0.072844	0.05			AGA:Arg	-0.0969585
AGG	17	0.382867	0.05	0.382867	0.05			AGG:Arg	0.0113294
CGA	47	0.002331	0.05	0.002331	0.05			CGA:Arg	-0.0617686
CGC	2.5	0.004079	0.05	0.004079	0.05			CGC:Arg	0.0522397
CGG	23.5	1	0.05	1	0.05			CGG:Arg	-5.81409e-05
CGT	0	0.000583	0.05	0.000583	0.05			CGT:Arg	0.0956504
Asn:AAC	4	0.006993	0.05	0.006993	0.05			AAC:Asn	0.0256145
AAT	45	0.006993	0.05	0.006993	0.05			AAT:Asn	-0.0256145
Asp:GAC	49	0.000583	0.05	0.000583	0.05			GAC:Asp	-0.0263045
GAT	0	0.000583	0.05	0.000583	0.05			GAT:Asp	0.0263045
Cys:TGC	0	0.000583	0.05	0.000583	0.05			TGC:Cys	0.0742133
TGT	49	0.000583	0.05	0.000583	0.05			TGT:Cys	-0.0742133
Gln:GAA	44	0.011072	0.05	0.011072	0.05			GAA:Glu	-0.00708827
GAG	5	0.011072	0.05	0.011072	0.05			GAG:Glu	0.00708827
Glu:CAA	49	0.000583	0.05	0.000583	0.05			CAA:Gln	-0.0371132
CAG	0	0.000583	0.05	0.000583	0.05			CAG:Gln	0.0371132
Gly:GGA	43	0.017483	0.05	0.017483	0.05			GGA:Gly	-0.0464227
GGC	0	0.000583	0.05	0.000583	0.05			GGC:Gly	0.0749825
GGG	49	0.000583	0.05	0.000583	0.05			GGG:Gly	-0.0633364
GGT	0	0.000583	0.05	0.000583	0.05			GGT:Gly	0.034805
His:CAC	1	0.001166	0.05	0.001166	0.05			CAC:His	0.0559969
CAT	48	0.001166	0.05	0.001166	0.05			CAT:His	-0.0559969
Ile:ATA	38	0.097319	0.05	0.097319	0.05			ATA:Ile	-0.014075
ATC	5	0.011072	0.05	0.011072	0.05			ATC:Ile	0.0198353
ATT	30.5	0.534965	0.05	0.534965	0.05			ATT:Ile	-0.00576004
Leu:CTA	46.5	0.004079	0.05	0.004079	0.05			CTA:Leu	-0.027588
CTC	48	0.001166	0.05	0.001166	0.05			CTC:Leu	-0.0454915
CTG	0	0.000583	0.05	0.000583	0.05			CTG:Leu	0.208671
CTT	46	0.004079	0.05	0.004079	0.05			CTT:Leu	-0.0553948
TTA	49	0.000583	0.05	0.000583	0.05			TTA:Leu	-0.0246667
TTG	48	0.001166	0.05	0.001166	0.05			TTG:Leu	-0.0556088
Lys:AAA	48	0.001166	0.05	0.001166	0.05			AAA:Lys	-0.0322156
AAG	1	0.001166	0.05	0.001166	0.05			AAG:Lys	0.0322156
Phe:TTC	40.5	0.05303	0.05	0.05303	0.05			TTC:Phe	-0.0153803
TTT	7.5	0.037879	0.05	0.037879	0.05			TTT:Phe	0.0153803
Pro:CCA	39	0.072844	0.05	0.072844	0.05			CCA:Pro	-0.0390894
CCC	0	0.000583	0.05	0.000583	0.05			CCC:Pro	0.0769029
CCG	29.5	0.620047	0.05	0.620047	0.05			CCG:Pro	-0.00959297
CCT	44.5	0.011072	0.05	0.011072	0.05			CCT:Pro	-0.0282069
Ser:AGC	0	0.000583	0.05	0.000583	0.05			AGC:Ser	0.100641
AGT	49	0.000583	0.05	0.000583	0.05			AGT:Ser	-0.0669541
TCA	49	0.000583	0.05	0.000583	0.05			TCA:Ser	-0.104972
TCC	4.5	0.011072	0.05	0.011072	0.05			TCC:Ser	0.0466885
TCG	4	0.006993	0.05	0.006993	0.05			TCG:Ser	0.0187924
TCT	17	0.382867	0.05	0.382867	0.05			TCT:Ser	0.00571646
Thr:ACA	49	0.000583	0.05	0.000583	0.05			ACA:Thr	-0.0722675
ACC	0	0.000583	0.05	0.000583	0.05			ACC:Thr	0.139909
ACG	0	0.000583	0.05	0.000583	0.05			ACG:Thr	0.0390258
ACT	49	0.000583	0.05	0.000583	0.05			ACT:Thr	-0.106679
Tyr:TAC	15.5	0.317599	0.05	0.317599	0.05			TAC:Tyr	0.0167241
TAT	35.5	0.208625	0.05	0.208625	0.05			TAT:Tyr	-0.0167241
Val:GTA	48.5	0.001166	0.05	0.001166	0.05			GTA:Val	-0.0330014
GTC	11.5	0.128205	0.05	0.128205	0.05			GTC:Val	0.0190613
GTG	0	0.000583	0.05	0.000583	0.05			GTG:Val	0.0815069
GTT	49	0.000583	0.05	0.000583	0.05			GTT:Val	-0.0675593

## Sheet: NLW_DLW_CD1
	stat	pvalues	alpha	new_pvalues	bonf_alpha			Effect Sizes	E10	E11	E12	E13	E14	E15	E16	E17	E18
Ala:GCA	1320.5	0	0.05	0	0.05			GCA:Ala	-0.0428903	-0.0285214	-0.191816	-0.185401	-0.205396	-0.203133	-0.129066	-0.078293	-0.0265202	-0.121226
GCC	350	7.4e-05	0.05	7.4e-05	0.05			GCC:Ala	0.00954319	0.00833941	0.0997589	0.122265	0.121742	0.120313	0.0650914	0.0170591	-0.00975684	0.061595
GCG	1350.5	0	0.05	0	0.05			GCG:Ala	-0.0540649	-0.03338	-0.0611253	-0.0809765	-0.094219	-0.0959929	-0.0861166	-0.0775034	-0.0694392	-0.0725353
GCT	6	0	0.05	0	0.05			GCT:Ala	0.0874313	0.0535708	0.153187	0.144123	0.177838	0.178792	0.150109	0.13877	0.105716	0.132171
Arg:AGA	696.5	0.800238	0.05	0.800238	0.05			AGA:Arg	0.0348601	-0.0144822	-0.0706944	-0.0999133	-0.0363278	0.00277133	0.14271	0.296429	0.371064	0.0696019
AGG	490.5	0.016032	0.05	0.016032	0.05			AGG:Arg	0.102123	0.103106	0.221638	0.216811	0.205415	0.151791	0.0202411	-0.0990815	-0.165154	0.0840989
CGA	1271.5	0	0.05	0	0.05			CGA:Arg	-0.0425869	-0.0384071	-0.109185	-0.16934	-0.161424	-0.161462	-0.194007	-0.230714	-0.243196	-0.150036
CGC	1101	5.3e-05	0.05	5.3e-05	0.05			CGC:Arg	-0.0351376	-0.0182958	-0.109443	-0.0946967	-0.117368	-0.108805	-0.071106	-0.0917431	-0.0256291	-0.0746916
CGG	1429	0	0.05	0	0.05			CGG:Arg	-0.0779302	-0.0693553	-0.123717	-0.113266	-0.149916	-0.204884	-0.151194	-0.150516	-0.144661	-0.131716
CGT	70.5	0	0.05	0	0.05			CGT:Arg	0.0186298	0.0367861	0.191135	0.260327	0.259615	0.320204	0.253181	0.275202	0.207319	0.202489
Asn:AAC	905.5	0.057665	0.05	0.057665	0.05			AAC:Asn	-0.0105276	-0.0130543	-0.000136315	-0.00192471	-0.0154752	-0.00213305	-0.0172224	-0.0368089	-0.0279121	-0.0139105
AAT	539	0.057665	0.05	0.057665	0.05			AAT:Asn	0.0105276	0.0130543	0.000136315	0.00192471	0.0154752	0.00213305	0.0172224	0.0368089	0.0279121	0.0139105
Asp:GAC	1444	0	0.05	0	0.05			GAC:Asp	-0.0394931	-0.0489638	-0.104565	-0.0960867	-0.116771	-0.119581	-0.0832604	-0.0752308	-0.061761	-0.0828569
GAT	0	0	0.05	0	0.05			GAT:Asp	0.0394931	0.0489638	0.104565	0.0960867	0.116771	0.119581	0.0832604	0.0752308	0.061761	0.0828569
Cys:TGC	122	0	0.05	0	0.05			TGC:Cys	-0.0291162	-0.00243489	0.0394656	0.0700156	0.0515351	0.072197	0.058864	0.0627815	0.0456198	0.040992
TGT	1322	0	0.05	0	0.05			TGT:Cys	0.0291162	0.00243489	-0.0394656	-0.0700156	-0.0515351	-0.072197	-0.058864	-0.0627815	-0.0456198	-0.040992
Gln:GAA	279	2e-06	0.05	2e-06	0.05			GAA:Glu	-0.011735	0.00697741	0.0499515	0.06554	0.0566074	0.0760307	0.0600467	0.039315	0.021528	0.0404735
GAG	1164.5	2e-06	0.05	2e-06	0.05			GAG:Glu	0.011735	-0.00697741	-0.0499515	-0.06554	-0.0566074	-0.0760307	-0.0600467	-0.039315	-0.021528	-0.0404735
Glu:CAA	1077	0.000164	0.05	0.000164	0.05			CAA:Gln	-0.0194992	-0.019925	-0.0321955	-0.0371234	-0.0436679	-0.0522118	-0.0550535	-0.0463987	-0.0436648	-0.03886
CAG	365.5	0.000157	0.05	0.000157	0.05			CAG:Gln	0.0194992	0.019925	0.0321955	0.0371234	0.0436679	0.0522118	0.0550535	0.0463987	0.0436648	0.03886
Gly:GGA	1020.5	0.001725	0.05	0.001725	0.05			GGA:Gly	-0.0147789	-0.0329596	-0.119802	-0.114258	-0.104547	-0.0851279	-0.0222501	0.0285528	0.081036	-0.0426816
GGC	520.5	0.036739	0.05	0.036739	0.05			GGC:Gly	-0.00235193	0.0175068	0.0619458	0.0680925	0.094648	0.058716	0.00722687	-0.0383327	-0.0781082	0.0210381
GGG	1304	0	0.05	0	0.05			GGG:Gly	-0.011687	-0.00797973	-0.113182	-0.117767	-0.152918	-0.16189	-0.144565	-0.0976422	-0.088245	-0.0995417
GGT	62	0	0.05	0	0.05			GGT:Gly	0.02881	0.0234042	0.171019	0.163906	0.162815	0.188299	0.159606	0.107421	0.0853223	0.121178
His:CAC	438.5	0.00298	0.05	0.00298	0.05			CAC:His	-0.0364993	0.00298398	0.0918184	0.0875253	0.106794	0.0684447	0.0561259	-0.0205547	-0.054102	0.0336152
CAT	1003	0.003199	0.05	0.003199	0.05			CAT:His	0.0364993	-0.00298398	-0.0918184	-0.0875253	-0.106794	-0.0684447	-0.0561259	0.0205547	0.054102	-0.0336152
Ile:ATA	152	0	0.05	0	0.05			ATA:Ile	0	0.00162454	0.0510667	0.0280527	0.0403571	0.0199013	0.0456195	0.0393963	0.0521712	0.0309099
ATC	1398	0	0.05	0	0.05			ATC:Ile	-0.0608119	-0.0389026	-0.0850352	-0.0537526	-0.0649267	-0.0796018	-0.0736886	-0.0582114	-0.0398142	-0.0616383
ATT	142	0	0.05	0	0.05			ATT:Ile	0.0608092	0.0372774	0.0339724	0.0257047	0.0245977	0.0597026	0.0280651	0.0188254	-0.0123521	0.0307336
Leu:CTA	954.5	0.015568	0.05	0.015568	0.05			CTA:Leu	-0.00211823	0.00052659	-0.0776211	-0.0662408	-0.0696624	-0.0452429	0.00729509	0.060089	0.0650841	-0.0142101
CTC	1332	0	0.05	0	0.05			CTC:Leu	-0.0662095	-0.0530559	-0.0496773	-0.05378	-0.0822453	-0.0877186	-0.0686344	-0.0810678	-0.075273	-0.0686291
CTG	222	0	0.05	0	0.05			CTG:Leu	0.0666596	0.105985	0.384912	0.427468	0.432243	0.39696	0.242247	0.0632074	-0.0156178	0.233785
CTT	1197.5	0	0.05	0	0.05			CTT:Leu	-0.0752222	-0.0552602	-0.133513	-0.138716	-0.138086	-0.111296	-0.06316	-0.00239649	0.0540615	-0.0737321
TTA	1175	1e-06	0.05	1e-06	0.05			TTA:Leu	-0.0365924	-0.0227346	-0.0447247	-0.0649921	-0.0677587	-0.0627401	-0.055249	-0.0286196	-0.0381642	-0.0468417
TTG	1014.5	0.002154	0.05	0.002154	0.05			TTG:Leu	0.113414	0.0228959	-0.0794945	-0.104351	-0.0746323	-0.090378	-0.0627281	-0.011296	0.0099195	-0.030739
Lys:AAA	1397	0	0.05	0	0.05			AAA:Lys	-0.049141	-0.0337007	-0.0943281	-0.106069	-0.114179	-0.122373	-0.102704	-0.0707955	-0.0478706	-0.0823513
AAG	47	0	0.05	0	0.05			AAG:Lys	0.049141	0.0337007	0.0943281	0.106069	0.114179	0.122373	0.102704	0.0707955	0.0478706	0.0823513
Phe:TTC	1413	0	0.05	0	0.05			TTC:Phe	-0.0375731	-0.0263999	-0.0247029	-0.0298836	-0.0620859	-0.0574874	-0.0697271	-0.0909969	-0.101015	-0.0555413
TTT	28.5	0	0.05	0	0.05			TTT:Phe	0.0375731	0.0263999	0.0247029	0.0298836	0.0620859	0.0574874	0.0697271	0.0909969	0.101015	0.0555413
Pro:CCA	958.5	0.013827	0.05	0.013827	0.05			CCA:Pro	0.0276683	0.00288804	-0.141249	-0.143135	-0.111488	-0.131484	-0.0569739	-0.00738843	0.0254576	-0.0595228
CCC	119.5	0	0.05	0	0.05			CCC:Pro	0.0494715	0.0706754	0.193314	0.183743	0.166438	0.205078	0.150798	0.12643	0.0646799	0.134514
CCG	1426	0	0.05	0	0.05			CCG:Pro	-0.0483743	-0.0598986	-0.111379	-0.0840812	-0.103204	-0.132447	-0.147635	-0.150551	-0.146036	-0.10929
CCT	320	1.6e-05	0.05	1.6e-05	0.05			CCT:Pro	-0.0287857	-0.0138563	0.0593095	0.0434544	0.04828	0.0588485	0.0537807	0.0314264	0.0558879	0.0342606
Ser:AGC	107.5	0	0.05	0	0.05			AGC:Ser	-0.0199702	0.0270726	0.337138	0.368645	0.3896	0.444237	0.357452	0.25371	0.180444	0.259814
AGT	1233.5	0	0.05	0	0.05			AGT:Ser	0.0461909	0.0039359	-0.132349	-0.146409	-0.179468	-0.196596	-0.151979	-0.179542	-0.126339	-0.118062
TCA	1425.5	0	0.05	0	0.05			TCA:Ser	-0.0773056	-0.0552571	-0.19212	-0.243745	-0.255629	-0.257002	-0.198835	-0.163368	-0.126586	-0.174428
TCC	1121	1.9e-05	0.05	1.9e-05	0.05			TCC:Ser	0.00727684	-0.0233093	-0.13874	-0.15192	-0.146098	-0.159013	-0.0951772	-0.0195231	0.0679896	-0.0731683
TCG	1361	0	0.05	0	0.05			TCG:Ser	-0.0553935	-0.0281299	-0.0785333	-0.0912747	-0.120803	-0.126968	-0.129454	-0.0813173	-0.0635407	-0.0861572
TCT	13.5	0	0.05	0	0.05			TCT:Ser	0.0992041	0.0752756	0.204484	0.264407	0.312378	0.295198	0.217817	0.189776	0.0679896	0.191837
Thr:ACA	1067.5	0.000256	0.05	0.000256	0.05			ACA:Thr	0.0112151	-0.0146577	-0.152421	-0.175262	-0.168749	-0.144922	-0.0602234	0.0129581	0.0847435	-0.0674799
ACC	386.5	0.000394	0.05	0.000394	0.05			ACC:Thr	-0.0537167	0.0190269	0.285981	0.301593	0.267489	0.295997	0.137014	-0.0261846	-0.0766524	0.127839
ACG	787.5	0.504986	0.05	0.504986	0.05			ACG:Thr	-0.0380183	-0.0264725	-0.0783075	-0.0327425	-0.0400522	-0.036171	0.0218428	0.052414	0.0502354	-0.0141413
ACT	1114.5	2.8e-05	0.05	2.8e-05	0.05			ACT:Thr	0.0805297	0.021872	-0.0555042	-0.0938213	-0.0587355	-0.115011	-0.09872	-0.0391418	-0.0583285	-0.0463178
Tyr:TAC	655.5	0.498394	0.05	0.498394	0.05			TAC:Tyr	-0.00584142	-0.00736391	0.0404061	0.0526678	0.0600842	0.018589	-0.0244743	-0.0597179	-0.0724889	0.000206739
TAT	786.5	0.511624	0.05	0.511624	0.05			TAT:Tyr	0.00584142	0.00736391	-0.0404061	-0.0526678	-0.0600842	-0.018589	0.0244743	0.0597179	0.0724889	-0.000206739
Val:GTA	1257.5	0	0.05	0	0.05			GTA:Val	0.00579301	-0.00211477	-0.00927738	-0.0407902	-0.0763022	-0.0787742	-0.0486301	-0.0439915	-0.0404487	-0.0371707
GTC	1322.5	0	0.05	0	0.05			GTC:Val	-0.0596503	-0.0374174	-0.0680885	-0.0408389	-0.0726995	-0.0514254	-0.0568718	-0.0439355	-0.0219142	-0.0503157
GTG	309.5	1e-05	0.05	1e-05	0.05			GTG:Val	-0.0164413	0.012292	0.125458	0.135639	0.165779	0.177656	0.112907	0.0655778	0.0222677	0.089015
GTT	892	0.078197	0.05	0.078197	0.05			GTT:Val	0.0702939	0.0271393	-0.0480919	-0.0540294	-0.016788	-0.04747	-0.00741919	0.0223072	0.0400866	-0.00155238

## Sheet: NEW_DEW_C57BL6
	stat	pvalues	alpha	new_pvalues	bonf_alpha			Effect Sizes	E10	E11	E12	E14	E15	E16	E18
Ala:GCA	560.5	0	0.05	0	0.05			GCA:Ala	0.0446318	0.0149984	0.010532	0.0427211	1.5046	0.113645
GCC	3633	0	0.05	0	0.05			GCC:Ala	-0.132877	-0.0328032	-0.0321276	-0.0882566	-3.06925	0.0798661
GCG	2742.5	0.000846	0.05	0.000846	0.05			GCG:Ala	0.00355149	-0.0110573	-0.00193338	0.0101455	2.25427	0.111618
GCT	458	0	0.05	0	0.05			GCT:Ala	0.0847155	0.0288621	0.0235291	0.0356452	4.77346	-0.304941
Arg:AGA	1163.5	1.8e-05	0.05	1.8e-05	0.05			AGA:Arg	0.0745994	0.0233154	0.00531588	0.0597351	2.21689	-0.0455695
AGG	769.5	0	0.05	0	0.05			AGG:Arg	0.0779188	0.00825885	0.00912275	0.00987161	-1.57181	0.0435418
CGA	3514.5	0	0.05	0	0.05			CGA:Arg	-0.0265505	-0.0174532	-0.0216531	-0.0082269	2.21689	-0.0583685
CGC	2981.5	6e-06	0.05	6e-06	0.05			CGC:Arg	-0.144294	-0.0220341	-0.0180599	-0.0825495	-2.82947	0.0781644
CGG	2432	0.067498	0.05	0.067498	0.05			CGG:Arg	-0.0728094	-0.0152292	0.00165978	0.048561	2.21689	0.201796
CGT	791	0	0.05	0	0.05			CGT:Arg	0.0911963	0.0231416	0.0236147	-0.0266004	-0.287402	-0.219521
Asn:AAC	3644	0	0.05	0	0.05			AAC:Asn	-0.0566004	-0.0130629	-0.00922218	-0.0286019	1.74029	-0.0936967
AAT	452.5	0	0.05	0	0.05			AAT:Asn	0.0566004	0.0130629	0.00922218	0.0286019	-1.74029	0.0936967
Asp:GAC	3719	0	0.05	0	0.05			GAC:Asp	-0.0806511	-0.0256697	-0.0211602	-0.0531395	-3.36406	-0.000193228
GAT	377.5	0	0.05	0	0.05			GAT:Asp	0.0806511	0.0256697	0.0211602	0.0531395	3.36406	0.000193228
Cys:TGC	3791.5	0	0.05	0	0.05			TGC:Cys	-0.0697337	-0.0325505	-0.026519	-0.0572277	-4.03967	-0.0388646
TGT	310.5	0	0.05	0	0.05			TGT:Cys	0.0697337	0.0325505	0.026519	0.0572277	4.03967	0.0388646
Gln:GAA	842	0	0.05	0	0.05			GAA:Glu	0.045596	0.00924514	0.00724809	0.0355242	3.25501	-0.0621399
GAG	3257	0	0.05	0	0.05			GAG:Glu	-0.045596	-0.00924514	-0.00724809	-0.0355242	-3.25501	0.0621399
Glu:CAA	1221.5	6.4e-05	0.05	6.4e-05	0.05			CAA:Gln	-1.11022e-16	0.00526853	0.00269906	-0.00660294	-0.594947	-0.0980539
CAG	2909.5	3e-05	0.05	3e-05	0.05			CAG:Gln	0	-0.00526853	-0.00269906	0.00660294	0.594947	0.0980539
Gly:GGA	2961.5	9e-06	0.05	9e-06	0.05			GGA:Gly	-0.0189848	-0.00927493	-0.00790302	0.0164729	1.67752	0.00540815	4.97559
GGC	2333.5	0.175756	0.05	0.175756	0.05			GGC:Gly	0.0243134	-0.00621054	-0.000771861	-0.0135999	-2.63155	0.154031	-9.67674
GGG	2241.5	0.360173	0.05	0.360173	0.05			GGG:Gly	0.0357632	-0.000201506	-0.00271139	0.0419898	9.01043	0.170574	15.1202
GGT	779	0	0.05	0	0.05			GGT:Gly	-0.0410838	0.0156872	0.0113863	-0.0442698	1.60804	-0.329786	8.66453
His:CAC	3698.5	0	0.05	0	0.05			CAC:His	-0.0355731	-0.0154592	-0.018713	-0.0513907	-2.76953	-0.061896
CAT	397	0	0.05	0	0.05			CAT:His	0.0355731	0.0154592	0.018713	0.0513907	2.76953	0.061896
Ile:ATA	231	0	0.05	0	0.05			ATA:Ile	0.0521481	0.0117121	0.0136216	0.0175766	-0.4	-0.0443553
ATC	3793.5	0	0.05	0	0.05			ATC:Ile	-0.154329	-0.0303928	-0.02341	-0.0634068	-1.37209	0.0152416
ATT	357.5	0	0.05	0	0.05			ATT:Ile	0.102186	0.0186807	0.0097885	0.0458563	1.27707	0.0291056
Leu:CTA	1419.5	0.002594	0.05	0.002594	0.05			CTA:Leu	0.062304	0.00546458	0.00668045	0.0361356	2.57831	-0.0343024
CTC	3817	0	0.05	0	0.05			CTC:Leu	-0.133515	-0.0224941	-0.018437	-0.0869849	-3.59071	-0.0891234
CTG	755	0	0.05	0	0.05			CTG:Leu	-0.0216305	0.0114256	0.0163536	0.00666023	5.44934	0.149229
CTT	3602.5	0	0.05	0	0.05			CTT:Leu	-0.0232736	-0.0190426	-0.0136413	-0.0134079	-0.544583	-0.143094
TTA	1158	1.6e-05	0.05	1.6e-05	0.05			TTA:Leu	0.0644201	0.0135946	0.00181496	0.039091	2.77437	0.0362774
TTG	510.5	0	0.05	0	0.05			TTG:Leu	0.0517232	0.0110518	0.00722891	0.0186002	-3.70103	0.0810148
Lys:AAA	394.5	0	0.05	0	0.05			AAA:Lys	0.0261455	0.00803385	0.0066451	0.0268742	2.33091	0.0150993
AAG	3700	0	0.05	0	0.05			AAG:Lys	-0.0261455	-0.00803385	-0.0066451	-0.0268742	-2.33091	-0.0150993
Phe:TTC	3678	0	0.05	0	0.05			TTC:Phe	-0.0965909	-0.0163415	-0.0189546	-0.0763247	-3.44657	-0.0920057
TTT	416	0	0.05	0	0.05			TTT:Phe	0.0965909	0.0163415	0.0189546	0.0763247	3.44657	0.0920057
Pro:CCA	573	0	0.05	0	0.05			CCA:Pro	0.0502161	0.00970857	0.00947916	0.0779838	2.25488	0.166931	21.8163
CCC	1353.5	0.000846	0.05	0.000846	0.05			CCC:Pro	0.0143457	0.00796144	0.00146381	-0.0499677	-4.55896	0.0380709	-11.1558
CCG	3129.5	0	0.05	0	0.05			CCG:Pro	-0.00627766	-0.0133423	-0.0096494	0.0340884	4.88351	0.123113	48.8776
CCT	2368	0.128167	0.05	0.128167	0.05			CCT:Pro	-0.0582789	-0.00432729	-0.00129362	-0.0617089	-2.12419	-0.327838	-5.2449
Ser:AGC	3734	0	0.05	0	0.05			AGC:Ser	-0.21186	-0.0418052	-0.0336545	-0.0268112	3.90892	-0.0681096
AGT	332	0	0.05	0	0.05			AGT:Ser	0.1352	0.0301221	0.0238489	0.0664921	6.07028	0.0729399
TCA	467.5	0	0.05	0	0.05			TCA:Ser	0.0571079	0.0162395	0.0142173	0.0526515	3.79114	0.117861
TCC	2621.5	0.006087	0.05	0.006087	0.05			TCC:Ser	-0.0407909	-0.00901513	-0.00224089	-0.081436	-5.04496	0.0428133
TCG	2716.5	0.001332	0.05	0.001332	0.05			TCG:Ser	-0.0104932	-0.00813712	-0.0107676	0.0336257	1.48458	0.0403628
TCT	1196.5	3.8e-05	0.05	3.8e-05	0.05			TCT:Ser	0.0709507	0.012596	0.00859704	-0.0439366	-11.9614	-0.20571
Thr:ACA	228.5	0	0.05	0	0.05			ACA:Thr	0.10716	0.0244268	0.0276585	0.102964	5.03148	0.118378
ACC	3766.5	0	0.05	0	0.05			ACC:Thr	-0.149914	-0.0353427	-0.036555	-0.127245	-4.69245	-0.0483999
ACG	1590	0.0289	0.05	0.0289	0.05			ACG:Thr	-0.0111109	0.00148667	-0.000255546	0.00738023	2.53129	0.0383848
ACT	958	0	0.05	0	0.05			ACT:Thr	0.0538724	0.00942966	0.00915189	0.0178095	3.5693	-0.108235
Tyr:TAC	3640.5	0	0.05	0	0.05			TAC:Tyr	-0.046523	-0.0191333	-0.0204279	-0.0334648	-2.8729	-0.0445966	-11.5554
TAT	457.5	0	0.05	0	0.05			TAT:Tyr	0.046523	0.0191333	0.0204279	0.0334648	2.8729	0.0445966	11.5554
Val:GTA	180.5	0	0.05	0	0.05			GTA:Val	0.0851582	0.0140542	0.0141137	0.0369965	2.22159	0.0951401
GTC	3876	0	0.05	0	0.05			GTC:Val	-0.0865139	-0.015494	-0.0245941	-0.0662685	-4.03238	-0.0552599
GTG	3029.5	2e-06	0.05	2e-06	0.05			GTG:Val	-0.102047	-0.0153174	-0.00393578	-0.0124173	-0.146521	0.0794096
GTT	739	0	0.05	0	0.05			GTT:Val	0.103356	0.0167572	0.0144165	0.0416704	3.49703	-0.119277

## Sheet: NEW_DEW_C57BL6J
	stat	pvalues	alpha	new_pvalues	bonf_alpha			Effect Sizes	E12	E13	E14	E15	E17	E18
Ala:GCA	43.5	0.684211	0.05	0.684211	0.05			GCA:Ala		0.32259		0.0156187		0.0365854
GCC	74	0.075256	0.05	0.075256	0.05			GCC:Ala		-6.42488		-0.0931664		-4.85366
GCG	61	0.435872	0.05	0.435872	0.05			GCG:Ala		-13.615		-0.00592017		-4.85366
GCT	34	0.247451	0.05	0.247451	0.05			GCT:Ala		18.848		0.0829394		10.561
Arg:AGA	40.5	0.528849	0.05	0.528849	0.05			AGA:Arg				0.0702333		0.437982
AGG	40.5	0.528849	0.05	0.528849	0.05			AGG:Arg				0.0423567		0.437982
CGA	77	0.043257	0.05	0.043257	0.05			CGA:Arg				-0.00253112		-6.23085
CGC	54.5	0.795936	0.05	0.795936	0.05			CGC:Arg				-0.111432		1.39305
CGG	45.5	0.795936	0.05	0.795936	0.05			CGG:Arg				0.046131		-1.31218
CGT	46	0.795936	0.05	0.795936	0.05			CGT:Arg				-0.0445928		1.36928
Asn:AAC	45.5	0.795936	0.05	0.795936	0.05			AAC:Asn		1		0.0235158		4.81818
AAT	59.5	0.528849	0.05	0.528849	0.05			AAT:Asn		-1		-0.0235158		-4.81818
Asp:GAC	78	0.035463	0.05	0.035463	0.05			GAC:Asp				-0.0799523
GAT	22	0.035463	0.05	0.035463	0.05			GAT:Asp				0.0799523
Cys:TGC	86	0.005196	0.05	0.005196	0.05			TGC:Cys				-0.103962
TGT	12.5	0.003886	0.05	0.003886	0.05			TGT:Cys				0.103962
Gln:GAA	46	0.795936	0.05	0.795936	0.05			GAA:Glu		1.35367		0.0155514		-8.85915
GAG	54	0.795936	0.05	0.795936	0.05			GAG:Glu		-1.35367		-0.0155514		8.85915
Glu:CAA	39	0.435872	0.05	0.435872	0.05			CAA:Gln		1.38889		0.00752225		1
CAG	62	0.393048	0.05	0.393048	0.05			CAG:Gln		-1.38889		-0.00752225		-1
Gly:GGA	69.5	0.165494	0.05	0.165494	0.05			GGA:Gly				-0.038782
GGC	37	0.352681	0.05	0.352681	0.05			GGC:Gly				-0.00254626
GGG	26.5	0.08921	0.05	0.08921	0.05			GGG:Gly				0.053589
GGT	48.5	0.970512	0.05	0.970512	0.05			GGT:Gly				-0.0120026
His:CAC	92	0.000725	0.05	0.000725	0.05			CAC:His				-0.0965013
CAT	8	0.000725	0.05	0.000725	0.05			CAT:His				0.0965013
Ile:ATA	68	0.190316	0.05	0.190316	0.05			ATA:Ile				-0.000938825
ATC	71.5	0.123005	0.05	0.123005	0.05			ATC:Ile				-0.09195
ATT	28	0.105122	0.05	0.105122	0.05			ATT:Ile				0.0945309
Leu:CTA	70.5	0.14314	0.05	0.14314	0.05			CTA:Leu				-0.0217876		-7.04717
CTC	100	1.1e-05	0.05	1.1e-05	0.05			CTC:Leu				-0.148671		-13.475
CTG	29.5	0.14314	0.05	0.14314	0.05			CTG:Leu				0.154698		6.00853
CTT	61	0.435872	0.05	0.435872	0.05			CTT:Leu				-0.0379353		-0.0250278
TTA	32	0.190316	0.05	0.190316	0.05			TTA:Leu				0.0364026		41.0111
TTG	57	0.630529	0.05	0.630529	0.05			TTG:Leu				0.0113732		-7.04717
Lys:AAA	54	0.795936	0.05	0.795936	0.05			AAA:Lys		1.24561		-0.00203525		-3.85954
AAG	46	0.795936	0.05	0.795936	0.05			AAG:Lys		-1.24561		0.00203525		3.85954
Phe:TTC	90	0.001505	0.05	0.001505	0.05			TTC:Phe				-0.119945		-5.3871
TTT	10	0.001505	0.05	0.001505	0.05			TTT:Phe				0.119945		5.3871
Pro:CCA	36	0.314999	0.05	0.314999	0.05			CCA:Pro		6.17647		0.0612007		-1.58968
CCC	42	0.578742	0.05	0.578742	0.05			CCC:Pro		2.58824		-0.0235385		5.58678
CCG	47	0.853428	0.05	0.853428	0.05			CCG:Pro		-13.5588		0.0437078		-0.913306
CCT	70.5	0.14314	0.05	0.14314	0.05			CCT:Pro		-0.835841		-0.0804103		-1.90124
Ser:AGC	70	0.14314	0.05	0.14314	0.05			AGC:Ser		-10.1667		-0.0459567		-7.25811
AGT	11	0.002089	0.05	0.002089	0.05			AGT:Ser		8.44444		0.0571094		6.67123
TCA	51.5	0.970512	0.05	0.970512	0.05			TCA:Ser		-1		0.0247492		-2.40256
TCC	35	0.279861	0.05	0.279861	0.05			TCC:Ser		8.88235		-0.0178903		14.4553
TCG	44.5	0.739364	0.05	0.739364	0.05			TCG:Ser		-15.75		0.0134205		6.67123
TCT	52	0.911797	0.05	0.911797	0.05			TCT:Ser		2.11628		-0.0305998		-4.35616
Thr:ACA	33	0.217563	0.05	0.217563	0.05			ACA:Thr				0.0740356
ACC	79.5	0.028806	0.05	0.028806	0.05			ACC:Thr				-0.146428
ACG	48	0.911797	0.05	0.911797	0.05			ACG:Thr				-0.0017847
ACT	29.5	0.14314	0.05	0.14314	0.05			ACT:Thr				0.0747527
Tyr:TAC	80	0.023231	0.05	0.023231	0.05			TAC:Tyr				-0.0752322		0.0196078
TAT	20	0.023231	0.05	0.023231	0.05			TAT:Tyr				0.0752322		-0.0196078
Val:GTA	25	0.063013	0.05	0.063013	0.05			GTA:Val				0.0630384		25.5833
GTC	97	7.6e-05	0.05	7.6e-05	0.05			GTC:Val				-0.0868976		-2.37209
GTG	66.5	0.247451	0.05	0.247451	0.05			GTG:Val				0.0107649		-2.93333
GTT	32.5	0.217563	0.05	0.217563	0.05			GTT:Val				0.0127087		13.3619

## Sheet: NEW_DEW_C57BL6N
	stat	pvalues	alpha	new_pvalues	bonf_alpha			Effect Sizes	E10	E12	E14	E16
Ala:GCA	39.5	0.068361	0.05	0.068361	0.05			GCA:Ala	0.066256	0.115839	0.0470006	0.0968964
GCC	110	0.028421	0.05	0.028421	0.05			GCC:Ala	-0.179479	-0.325539	-0.425479	-0.38148
GCG	43.5	0.113502	0.05	0.113502	0.05			GCG:Ala	-0.0307965	0.00044865	0.165739	0.0939037
GCT	25	0.00556	0.05	0.00556	0.05			GCT:Ala	0.143954	0.209572	0.21274	0.190788
Arg:AGA	45	0.127688	0.05	0.127688	0.05			AGA:Arg	0.10183	0.217329	0.0349496	-0.00609831
AGG	93	0.241524	0.05	0.241524	0.05			AGG:Arg	0.0304931	-0.00978322	-0.0573906	-0.0378441
CGA	50.5	0.241524	0.05	0.241524	0.05			CGA:Arg	-0.00578171	0.0326234	0.0551073	0.0558853
CGC	99	0.127688	0.05	0.127688	0.05			CGC:Arg	-0.152663	-0.244116	-0.184171	-0.165545
CGG	54.5	0.347358	0.05	0.347358	0.05			CGG:Arg	-0.0792747	0.08525	0.149242	0.145808
CGT	74.5	0.932301	0.05	0.932301	0.05			CGT:Arg	0.105468	-0.0807089	0.00230175	0.00787265
Asn:AAC	42	0.088734	0.05	0.088734	0.05			AAC:Asn	-0.0460261	0.0411671	0.0936264	0.0669262
AAT	102	0.088734	0.05	0.088734	0.05			AAT:Asn	0.0460261	-0.0411671	-0.0936264	-0.0669262
Asp:GAC	105.5	0.059657	0.05	0.059657	0.05			GAC:Asp	-0.0917092	-0.138612	-0.106585	-0.0756147
GAT	38.5	0.059657	0.05	0.059657	0.05			GAT:Asp	0.0917092	0.138612	0.106585	0.0756147
Cys:TGC	102	0.088734	0.05	0.088734	0.05			TGC:Cys	-0.0990712	-0.129344	-0.105227	-0.0915509
TGT	43	0.10053	0.05	0.10053	0.05			TGT:Cys	0.0990712	0.129344	0.105227	0.0915509
Gln:GAA	43	0.10053	0.05	0.10053	0.05			GAA:Glu	0.0413021	0.13691	0.117683	0.109379
GAG	101	0.10053	0.05	0.10053	0.05			GAG:Glu	-0.0413021	-0.13691	-0.117683	-0.109379
Glu:CAA	86.5	0.442833	0.05	0.442833	0.05			CAA:Gln	0.00673393	-0.0235802	-0.00773596	-0.024214
CAG	57.5	0.442833	0.05	0.442833	0.05			CAG:Gln	-0.00673393	0.0235802	0.00773596	0.024214
Gly:GGA	48	0.178182	0.05	0.178182	0.05			GGA:Gly	0.0193955	0.0322186	0.049099	0.0209988
GGC	93	0.241524	0.05	0.241524	0.05			GGC:Gly	-0.0334853	-0.134155	-0.159246	-0.126897
GGG	31	0.017271	0.05	0.017271	0.05			GGG:Gly	-0.0247492	0.0327247	0.049099	0.0748119
GGT	49	0.197808	0.05	0.197808	0.05			GGT:Gly	0.038746	0.0694476	0.061255	0.0310957
His:CAC	101	0.10053	0.05	0.10053	0.05			CAC:His	-0.0424724	-0.12854	-0.106377	-0.0588225
CAT	43	0.10053	0.05	0.10053	0.05			CAT:His	0.0424724	0.12854	0.106377	0.0588225
Ile:ATA	21	0.002316	0.05	0.002316	0.05			ATA:Ile	0.0488372	0.0342229	-0.00411116	0.021978
ATC	101	0.10053	0.05	0.10053	0.05			ATC:Ile	-0.115116	-0.0509936	-0.0517301	-0.0824176
ATT	50	0.218921	0.05	0.218921	0.05			ATT:Ile	0.0662791	0.0167839	0.0558347	0.0604396
Leu:CTA	30	0.014493	0.05	0.014493	0.05			CTA:Leu	0.0589155	0.13774	0.133865	0.079949
CTC	110	0.028421	0.05	0.028421	0.05			CTC:Leu	-0.119045	-0.200848	-0.273455	-0.295827
CTG	53.5	0.318585	0.05	0.318585	0.05			CTG:Leu	-0.0166872	-0.0262443	0.0811242	0.165282
CTT	86	0.442833	0.05	0.442833	0.05			CTT:Leu	-0.0300672	0.0169669	-0.0202809	-0.0432549
TTA	25	0.00556	0.05	0.00556	0.05			TTA:Leu	0.061649	0.144994	0.169864	0.143158
TTG	98	0.143168	0.05	0.143168	0.05			TTG:Leu	0.0452477	-0.0727429	-0.0912558	-0.0494341
Lys:AAA	42	0.088734	0.05	0.088734	0.05			AAA:Lys	0.0486811	0.0588729	0.0738631	0.0745196
AAG	101.5	0.10053	0.05	0.10053	0.05			AAG:Lys	-0.0486811	-0.0588729	-0.0738631	-0.0745196
Phe:TTC	105	0.059657	0.05	0.059657	0.05			TTC:Phe	-0.112997	-0.180497	-0.162221	-0.133613
TTT	39	0.059657	0.05	0.059657	0.05			TTT:Phe	0.112997	0.180497	0.162221	0.133613
Pro:CCA	32	0.020489	0.05	0.020489	0.05			CCA:Pro	0.0879454	0.137732	0.145913	0.175526
CCC	103	0.078024	0.05	0.078024	0.05			CCC:Pro	-0.0275836	-0.199194	-0.28924	-0.277739
CCG	48	0.178182	0.05	0.178182	0.05			CCG:Pro	-0.0772194	0.0764199	0.170097	0.158997
CCT	101	0.10053	0.05	0.10053	0.05			CCT:Pro	0.0168716	-0.0145658	-0.026546	-0.0567621
Ser:AGC	54	0.318585	0.05	0.318585	0.05			AGC:Ser	-0.212965	0.0631744	0.165545	0.0969167
AGT	27	0.008293	0.05	0.008293	0.05			AGT:Ser	0.113981	0.258089	0.180183	0.181071
TCA	42.5	0.10053	0.05	0.10053	0.05			TCA:Ser	0.0306296	0.152803	0.142839	0.0928436
TCC	113	0.017271	0.05	0.017271	0.05			TCC:Ser	-0.021736	-0.381696	-0.353138	-0.258378
TCG	46.5	0.159973	0.05	0.159973	0.05			TCG:Ser	0.00160605	0.0288244	0.061583	0.0836132
TCT	108	0.038721	0.05	0.038721	0.05			TCT:Ser	0.0885725	-0.120994	-0.197057	-0.195989
Thr:ACA	26.5	0.008293	0.05	0.008293	0.05			ACA:Thr	0.12	0.314964	0.387681	0.36772
ACC	111	0.024184	0.05	0.024184	0.05			ACC:Thr	-0.143333	-0.455908	-0.588678	-0.554305
ACG	39	0.059657	0.05	0.059657	0.05			ACG:Thr	-0.0166667	0.125413	0.20264	0.106908
ACT	59	0.477575	0.05	0.477575	0.05			ACT:Thr	0.04	0.0184918	-0.000986948	0.0808323
Tyr:TAC	99	0.127688	0.05	0.127688	0.05			TAC:Tyr	-0.0507346	-0.0906438	-0.0353346	-0.0411567
TAT	45	0.127688	0.05	0.127688	0.05			TAT:Tyr	0.0507346	0.0906438	0.0353346	0.0411567
Val:GTA	36.5	0.044902	0.05	0.044902	0.05			GTA:Val	0.0628431	0.0559262	0.123656	0.055586
GTC	111.5	0.024184	0.05	0.024184	0.05			GTC:Val	-0.0635057	-0.137996	-0.260015	-0.187173
GTG	73	0.977402	0.05	0.977402	0.05			GTG:Val	-0.0794262	-0.0692874	0.0178395	0.0476285
GTT	38.5	0.059657	0.05	0.059657	0.05			GTT:Val	0.080066	0.151336	0.118505	0.0839133

## Sheet: NHW_DHW_C57BL6
.	stat	pvalues	alpha	new_pvalues	bonf_alpha			Effect Sizes	E9	E10	E12	E14
Ala:GCA	53	0.652185	0.05	0.652185	0.05			GCA:Ala	0.023867	-0.0352205	0.02
GCC	34	0.087946	0.05	0.087946	0.05			GCC:Ala	-0.00341496	0.0576399	0.0444444
GCG	88	0.075891	0.05	0.075891	0.05			GCG:Ala	-0.0314101	0.0063976	-0.0155556
GCT	75	0.365308	0.05	0.365308	0.05			GCT:Ala	0.0109623	-0.0288127	-0.0488889
Arg:AGA	77	0.299986	0.05	0.299986	0.05			AGA:Arg	0.0214612	-0.209605	-0.0592728
AGG	61	1	0.05	1	0.05			AGG:Arg	-0.0569183	-0.00816272	0.0583685
CGA	77	0.299986	0.05	0.299986	0.05			CGA:Arg	0.0143087	-0.00489784	-0.0767853
CGC	36	0.116408	0.05	0.116408	0.05			CGC:Arg	-0.01457	0.113465	0.0642047
CGG	38	0.151275	0.05	0.151275	0.05			CGG:Arg	0.023845	0.113465	-0.0156886
CGT	42.5	0.270317	0.05	0.270317	0.05			CGT:Arg	0.0119242	-0.00408156	0.0291853
Asn:AAC	80	0.216945	0.05	0.216945	0.05			AAC:Asn	-0.0540541	0.00278819	-0.033033
AAT	43	0.270317	0.05	0.270317	0.05			AAT:Asn	0.0540541	-0.00278819	0.033033
Asp:GAC	78	0.270317	0.05	0.270317	0.05			GAC:Asp	-0.0357452	0.00405459	-0.0162398
GAT	43	0.270317	0.05	0.270317	0.05			GAT:Asp	0.0357452	-0.00405459	0.0162398
Cys:TGC	108	0.00104	0.05	0.00104	0.05			TGC:Cys	-0.0522876	-2.22045e-16	-0.0816172
TGT	20.5	0.00833	0.05	0.00833	0.05			TGT:Cys	0.0522876	0	0.0816172
Gln:GAA	59.5	1	0.05	1	0.05			GAA:Glu	0.0337669	-0.0723269	0
GAG	63.5	0.897663	0.05	0.897663	0.05			GAG:Glu	-0.0337669	0.0723269	-2.22041e-16
Glu:CAA	73	0.438463	0.05	0.438463	0.05			CAA:Gln	0.00951374	-0.081244	-0.0343249
CAG	48	0.438463	0.05	0.438463	0.05			CAG:Gln	-0.00951374	0.081244	0.0343249
Gly:GGA	87.5	0.087946	0.05	0.087946	0.05			GGA:Gly	-0.016704	-0.096193	-0.0402059
GGC	33	0.075891	0.05	0.075891	0.05			GGC:Gly	-0.0247591	0.075112	0.0396388
GGG	18	0.004102	0.05	0.004102	0.05			GGG:Gly	0.0222147	0.0424011	0.0420861
GGT	75	0.365308	0.05	0.365308	0.05			GGT:Gly	0.0192528	-0.0213258	-0.0415127
His:CAC	109	0.000765	0.05	0.000765	0.05			CAC:His	-0.0872875	-0.0222222	-0.0619048
CAT	12	0.000765	0.05	0.000765	0.05			CAT:His	0.0872875	0.0222222	0.0619048
Ile:ATA	76.5	0.331649	0.05	0.331649	0.05			ATA:Ile	-0.0141844	-0.0455927	0.0288071
ATC	60.5	1	0.05	1	0.05			ATC:Ile	-0.0070922	0.0625271	-0.0192156
ATT	70.5	0.561888	0.05	0.561888	0.05			ATT:Ile	0.0212766	-0.0169344	-0.00959538
Leu:CTA	81	0.193187	0.05	0.193187	0.05			CTA:Leu	-0.0132275	-0.0343242	-0.0103589
CTC	70	0.561888	0.05	0.561888	0.05			CTC:Leu	0.0291005	-0.00508996	-0.0331478
CTG	54	0.699353	0.05	0.699353	0.05			CTG:Leu	-0.103175	0.101686	0.0673403
CTT	94	0.028065	0.05	0.028065	0.05			CTT:Leu	-0.0238095	-0.137926	-0.0688795
TTA	103	0.004102	0.05	0.004102	0.05			TTA:Leu	-0.010582	-0.0286035	-0.00828711
TTG	0	3e-06	0.05	3e-06	0.05			TTG:Leu	0.121693	0.104233	0.0533558
Lys:AAA	87.5	0.087946	0.05	0.087946	0.05			AAA:Lys	-0.0163386	-0.104415	-0.020639
AAG	33.5	0.087946	0.05	0.087946	0.05			AAG:Lys	0.0163386	0.104415	0.020639
Phe:TTC	91	0.047307	0.05	0.047307	0.05			TTC:Phe	-0.0136852	-0.0208986	-0.0735294
TTT	30	0.047307	0.05	0.047307	0.05			TTT:Phe	0.0136852	0.0208986	0.0735294
Pro:CCA	71	0.519032	0.05	0.519032	0.05			CCA:Pro	-0.0427212	-0.0745842	0.0220056
CCC	17	0.003181	0.05	0.003181	0.05			CCC:Pro	0.101855	0.149843	0.0790704
CCG	67	0.699353	0.05	0.699353	0.05			CCG:Pro	0.0359516	-0.0131739	-0.00490475
CCT	120	6e-06	0.05	6e-06	0.05			CCT:Pro	-0.0950455	-0.0620551	-0.0961771
Ser:AGC	93.5	0.033596	0.05	0.033596	0.05			AGC:Ser	-0.0432117	-0.0276823	-0.099511
AGT	91	0.047307	0.05	0.047307	0.05			AGT:Ser	-0.0243083	-0.0462712	-0.0206075
TCA	75	0.365308	0.05	0.365308	0.05			TCA:Ser	-0.0233585	-0.0173035	0.0110873
TCC	46	0.365308	0.05	0.365308	0.05			TCC:Ser	-0.0432117	0.0627206	0.0556585
TCG	104.5	0.003181	0.05	0.003181	0.05			TCG:Ser	-0.00810302	-0.0051914	-0.00686955
TCT	20.5	0.00833	0.05	0.00833	0.05			TCT:Ser	0.142224	0.0337347	0.0602402
Thr:ACA	62	0.948729	0.05	0.948729	0.05			ACA:Thr	-0.0140767	-0.0240155	0.0368147
ACC	66	0.747658	0.05	0.747658	0.05			ACC:Thr	-0.0462424	0.0352042	-0.0608243
ACG	63	0.897663	0.05	0.897663	0.05			ACG:Thr	-0.00502762	0.0213687	-0.0160064
ACT	52	0.606318	0.05	0.606318	0.05			ACT:Thr	0.0653567	-0.0325621	0.040016
Tyr:TAC	103	0.004102	0.05	0.004102	0.05			TAC:Tyr	-0.0628031	0	-0.0961538
TAT	20.5	0.00833	0.05	0.00833	0.05			TAT:Tyr	0.0628031	0	0.0961538
Val:GTA	54.5	0.747658	0.05	0.747658	0.05			GTA:Val	0.015163	-0.00417317	0.0159788
GTC	93	0.033596	0.05	0.033596	0.05			GTC:Val	0.0178312	-0.0495926	-0.0263542
GTG	63	0.897663	0.05	0.897663	0.05			GTG:Val	-0.0582646	0.0954558	0.00826489
GTT	67	0.699353	0.05	0.699353	0.05			GTT:Val	0.0252715	-0.0416854	0.00210969

## Sheet: NHW_DHW_C57BL6J
	stat	pvalues	alpha	new_pvalues	bonf_alpha			Effect Sizes	E9	E11	E12	E13	E14	E15	E16	E17	E18
Ala:GCA	395	0.699578	0.05	0.699578	0.05			GCA:Ala	0.0221818			-0.0026029
GCC	375.5	0.496682	0.05	0.496682	0.05			GCC:Ala	-0.00775861			0.0194228
GCG	500	0.221063	0.05	0.221063	0.05			GCG:Ala	-0.0184872			0.000234237
GCT	481	0.353484	0.05	0.353484	0.05			GCT:Ala	0.00406322			-0.0170589
Arg:AGA	491.5	0.27864	0.05	0.27864	0.05			AGA:Arg	-0.00853135			-0.0238089
AGG	488	0.299885	0.05	0.299885	0.05			AGG:Arg	-0.0219625			-0.00141188
CGA	228.5	0.00253	0.05	0.00253	0.05			CGA:Arg	0.0177191			0.00116274
CGC	365.5	0.403881	0.05	0.403881	0.05			CGC:Arg	0.00160841			0.013379
CGG	489	0.292688	0.05	0.292688	0.05			CGG:Arg	-0.0261511			0.00268119
CGT	223.5	0.001915	0.05	0.001915	0.05			CGT:Arg	0.0373277			0.00809794
Asn:AAC	522	0.116777	0.05	0.116777	0.05			AAC:Asn	-0.0190376			-0.012112
AAT	312	0.093204	0.05	0.093204	0.05			AAT:Asn	0.0190376			0.012112
Asp:GAC	487	0.307196	0.05	0.307196	0.05			GAC:Asp	-0.0148196			-0.00350376
GAT	338	0.203883	0.05	0.203883	0.05			GAT:Asp	0.0148196			0.00350376
Cys:TGC	544	0.055337	0.05	0.055337	0.05			TGC:Cys	-0.0260463			-0.0111708
TGT	311	0.090167	0.05	0.090167	0.05			TGT:Cys	0.0260463			0.0111708
Gln:GAA	397.5	0.734193	0.05	0.734193	0.05			GAA:Glu	0.02475			-0.00389016
GAG	442.5	0.745854	0.05	0.745854	0.05			GAG:Glu	-0.02475			0.00389016
Glu:CAA	459.5	0.557304	0.05	0.557304	0.05			CAA:Gln	0.00555474			-0.0120285
CAG	386	0.599595	0.05	0.599595	0.05			CAG:Gln	-0.00555474			0.0120285
Gly:GGA	564.5	0.025372	0.05	0.025372	0.05			GGA:Gly	-0.0185524			-0.0276313
GGC	255.5	0.010015	0.05	0.010015	0.05			GGC:Gly	0.00815716			0.0385007
GGG	263.5	0.01447	0.05	0.01447	0.05			GGG:Gly	0.0104527			0.0253982
GGT	578	0.013833	0.05	0.013833	0.05			GGT:Gly	-5.40574e-05			-0.0362647
His:CAC	669	6.4e-05	0.05	6.4e-05	0.05			CAC:His	-0.0407108			-0.0207675
CAT	161.5	3e-05	0.05	3e-05	0.05			CAT:His	0.0407108			0.0207675
Ile:ATA	488.5	0.299885	0.05	0.299885	0.05			ATA:Ile	-0.00171764			-0.00198635
ATC	434	0.841006	0.05	0.841006	0.05			ATC:Ile	-0.0167795			0.00497747
ATT	358	0.337595	0.05	0.337595	0.05			ATT:Ile	0.0185075			-0.0029962
Leu:CTA	579.5	0.01322	0.05	0.01322	0.05			CTA:Leu	-0.0031325			-0.00851574
CTC	298	0.057389	0.05	0.057389	0.05			CTC:Leu	0.0105844			-1.25937e-05
CTG	402.5	0.793051	0.05	0.793051	0.05			CTG:Leu	-0.0400826			0.0151231
CTT	500.5	0.221063	0.05	0.221063	0.05			CTT:Leu	0.00777551			-0.0185478
TTA	563.5	0.026444	0.05	0.026444	0.05			TTA:Leu	-0.00233951			-0.00606735
TTG	70	0	0.05	0	0.05			TTG:Leu	0.0272706			0.017982
Lys:AAA	480	0.3616	0.05	0.3616	0.05			AAA:Lys	0.000142881			-0.012346
AAG	358.5	0.345482	0.05	0.345482	0.05			AAG:Lys	-0.000142881			0.012346
Phe:TTC	515.5	0.144713	0.05	0.144713	0.05			TTC:Phe	-0.0128402			-0.0130968
TTT	324.5	0.140439	0.05	0.140439	0.05			TTT:Phe	0.0128402			0.0130968
Pro:CCA	430	0.88955	0.05	0.88955	0.05			CCA:Pro	0.006783			-0.00170718
CCC	247	0.006481	0.05	0.006481	0.05			CCC:Pro	0.0362239			0.0379404
CCG	360	0.353484	0.05	0.353484	0.05			CCG:Pro	-0.0128575			0.0124318
CCT	707.5	3e-06	0.05	3e-06	0.05			CCT:Pro	-0.0301681			-0.0486872
Ser:AGC	609.5	0.002979	0.05	0.002979	0.05			AGC:Ser	-0.046092			-0.0167853
AGT	443	0.734193	0.05	0.734193	0.05			AGT:Ser	0.0147413			-0.00630948
TCA	511	0.162792	0.05	0.162792	0.05			TCA:Ser	-0.00252261			-0.0080995
TCC	401.5	0.781174	0.05	0.781174	0.05			TCC:Ser	-0.00766788			0.00911011
TCG	603	0.004098	0.05	0.004098	0.05			TCG:Ser	-0.016208			-0.00302413
TCT	230	0.002673	0.05	0.002673	0.05			TCT:Ser	0.0577527			0.0251006
Thr:ACA	548	0.047722	0.05	0.047722	0.05			ACA:Thr	-0.0128689			-0.0106288
ACC	408	0.853094	0.05	0.853094	0.05			ACC:Thr	-0.0227208			0.00573806
ACG	486.5	0.314623	0.05	0.314623	0.05			ACG:Thr	0.00171226			-0.00499164
ACT	263.5	0.01447	0.05	0.01447	0.05			ACT:Thr	0.0338844			0.00987953
Tyr:TAC	619	0.001709	0.05	0.001709	0.05			TAC:Tyr	-0.0318821			-0.0141052
TAT	233	0.003144	0.05	0.003144	0.05			TAT:Tyr	0.0318821			0.0141052
Val:GTA	325.5	0.144713	0.05	0.144713	0.05			GTA:Val	0.00609912			0.00200703
GTC	653.5	0.000202	0.05	0.000202	0.05			GTC:Val	-0.0161163			-0.00980018
GTG	434	0.841006	0.05	0.841006	0.05			GTG:Val	-0.0203557			0.0104065
GTT	366.5	0.412673	0.05	0.412673	0.05			GTT:Val	0.0303699			-0.00262761

## Sheet: NHW_DHW_CD1
	stat	pvalues	alpha	new_pvalues	bonf_alpha			Effect Sizes	E10	E11	E12	E13	E14	E15	E16	E17
Ala:GCA	139.5	0	0.05	0	0.05			GCA:Ala	-0.0152708	0.0286584	0.0144581	0.040188	0.0574158	0.0402653	0.0305478	0.0283427
GCC	465	0.017279	0.05	0.017279	0.05			GCC:Ala	0.00998123	-0.0109064	0.0129727	0.0226427	0.0247407	0.0322251	0.0412351	0.0396376
GCG	844	0.085659	0.05	0.085659	0.05			GCG:Ala	-0.0352737	-0.0262807	-0.00288654	0.000785381	0.00144144	0.000764434	0.000704863	-0.00288288
GCT	938	0.005751	0.05	0.005751	0.05			GCT:Ala	0.0405677	0.0085324	-0.0245403	-0.063613	-0.083589	-0.0732509	-0.0724801	-0.0651031
Arg:AGA	838	0.098302	0.05	0.098302	0.05			AGA:Arg	0.0606804	0.025881	-0.0159895	-0.0247692	-0.0716166	-0.0292017	-0.051147	-0.0424067
AGG	414	0.003136	0.05	0.003136	0.05			AGG:Arg	0.00663805	0.0269499	0.00473794	0.0167839	0.0483096	0.0339836	0.0124768	0.000591624
CGA	643	0.659428	0.05	0.659428	0.05			CGA:Arg	-0.0492319	-0.0321917	-0.000908614	-0.0027956	0.00451339	-0.00600581	0.00748068	0.0229949
CGC	543	0.127964	0.05	0.127964	0.05			CGC:Arg	-0.017093	-0.0137834	0.0097656	0.0167854	0.00752108	-0.00799801	0.0124768	0.0383194
CGG	723.5	0.682955	0.05	0.682955	0.05			CGG:Arg	-0.0332831	-0.0271138	-0.00477252	-0.0039991	0.00752108	0.0132073	0.0124768	-0.0385789
CGT	314	3.8e-05	0.05	3.8e-05	0.05			CGT:Arg	0.0323421	0.0202657	0.00716926	-0.00199969	0.00376126	-0.00399936	0.00623898	0.0191628
Asn:AAC	1275.5	0	0.05	0	0.05			AAC:Asn	-0.00917504	-0.0250859	-0.017782	-0.0295293	-0.0446672	-0.0273387	-0.0233579	-0.0610339
AAT	92.5	0	0.05	0	0.05			AAT:Asn	0.00917504	0.0250859	0.017782	0.0295293	0.0446672	0.0273387	0.0233579	0.0610339
Asp:GAC	1117.5	1e-06	0.05	1e-06	0.05			GAC:Asp	-0.0153979	-0.0216202	-0.00344853	-0.0109881	-0.0049911	-0.0138809	-0.0102328	-0.0293845
GAT	257.5	1e-06	0.05	1e-06	0.05			GAT:Asp	0.0153979	0.0216202	0.00344853	0.0109881	0.0049911	0.0138809	0.0102328	0.0293845
Cys:TGC	1042	7.3e-05	0.05	7.3e-05	0.05			TGC:Cys	-0.0480667	-0.0217757	-0.0105643	-0.0330513	-0.0283757	-0.0307971	-0.0256094	-0.056099
TGT	357.5	0.000319	0.05	0.000319	0.05			TGT:Cys	0.0480667	0.0217757	0.0105643	0.0330513	0.0283757	0.0307971	0.0256094	0.056099
Gln:GAA	523.5	0.083684	0.05	0.083684	0.05			GAA:Glu	0.0144576	0.0291069	0.00115056	0.0070993	-0.00763391	0.000548427	0.000906263	0.015313
GAG	857	0.06271	0.05	0.06271	0.05			GAG:Glu	-0.0144576	-0.0291069	-0.00115056	-0.0070993	0.00763391	-0.000548427	-0.000906263	-0.015313
Glu:CAA	1079	1e-05	0.05	1e-05	0.05			CAA:Gln	-0.018445	0.00115034	-0.00976269	-0.0183114	-0.0225479	-0.0196999	-0.0221374	-0.0239571
CAG	315	4e-05	0.05	4e-05	0.05			CAG:Gln	0.018445	-0.00115034	0.00976269	0.0183114	0.0225479	0.0196999	0.0221374	0.0239571
Gly:GGA	1098	3e-06	0.05	3e-06	0.05			GGA:Gly	0.0360703	-0.00468932	-0.0224216	-0.0560457	-0.0652313	-0.047069	-0.0507767	-0.0765268
GGC	254	1e-06	0.05	1e-06	0.05			GGC:Gly	0.00876905	0.0134024	0.0356626	0.0853568	0.12021	0.0792943	0.0807567	0.106338
GGG	213.5	0	0.05	0	0.05			GGG:Gly	0.00126692	0.0253785	0.0297684	0.0762764	0.097869	0.0732131	0.0705723	0.0909915
GGT	1107.5	2e-06	0.05	2e-06	0.05			GGT:Gly	-0.0460656	-0.0340814	-0.0430005	-0.10558	-0.152805	-0.105426	-0.100516	-0.120731
His:CAC	1291.5	0	0.05	0	0.05			CAC:His	-0.0785059	-0.0518282	-0.0336473	-0.0242333	-0.0500262	-0.0288953	-0.0433623	-0.106919
CAT	90.5	0	0.05	0	0.05			CAT:His	0.0785059	0.0518282	0.0336473	0.0242333	0.0500262	0.0288953	0.0433623	0.106919
Ile:ATA	550	0.148194	0.05	0.148194	0.05			ATA:Ile	-0.0227413	0.0102386	0.000903193	0.0244622	0.0320335	0.0268094	0.0130396	0.00893928
ATC	1068	1.9e-05	0.05	1.9e-05	0.05			ATC:Ile	-0.00217766	-0.0457581	-0.00802042	-0.0315532	-0.00805956	-0.0296443	-0.0114742	-0.0306926
ATT	493.5	0.039463	0.05	0.039463	0.05			ATT:Ile	0.0249273	0.0355246	0.00711766	0.00709729	-0.0239836	0.00283864	-0.00156643	0.0217601
Leu:CTA	1221	0	0.05	0	0.05			CTA:Leu	-0.0172832	-0.00469955	-0.00559979	-0.0141303	-0.0201598	-0.0161956	-0.0159387	-0.0182324
CTC	908	0.015296	0.05	0.015296	0.05			CTC:Leu	-0.00299766	-0.00688814	-0.0052269	-0.0314357	-0.064499	-0.0101367	-0.00967302	0.0164132
CTG	787.5	0.27192	0.05	0.27192	0.05			CTG:Leu	0.00189197	-0.04155	-0.0174309	-0.0106442	0.0253392	0.00504521	0.00183175	-0.0676389
CTT	971.5	0.001709	0.05	0.001709	0.05			CTT:Leu	-0.0416965	-0.00105174	-0.0106232	-0.0275816	-0.0646761	-0.0452759	-0.0303508	-0.00900481
TTA	679	0.957156	0.05	0.957156	0.05			TTA:Leu	-0.0143157	0.00448755	0.0113881	0.015886	0.0354688	0.000999211	0.0149749	0.0357222
TTG	73.5	0	0.05	0	0.05			TTG:Leu	0.0744151	0.0497614	0.0275034	0.0679254	0.0884746	0.0655754	0.0391621	0.0428277
Lys:AAA	781.5	0.301262	0.05	0.301262	0.05			AAA:Lys	-0.0247701	0.0031465	-0.00241681	0.000342773	-0.0132178	-0.00638664	-0.00677667	0.00818406
AAG	589	0.306347	0.05	0.306347	0.05			AAG:Lys	0.0247701	-0.0031465	0.00241681	-0.000342773	0.0132178	0.00638664	0.00677667	-0.00818406
Phe:TTC	1267	0	0.05	0	0.05			TTC:Phe	-0.0166238	-0.0265733	-0.0211203	-0.0402104	-0.0493359	-0.0374008	-0.0348857	-0.0393202
TTT	105	0	0.05	0	0.05			TTT:Phe	0.0166238	0.0265733	0.0211203	0.0402104	0.0493359	0.0374008	0.0348857	0.0393202
Pro:CCA	482	0.028382	0.05	0.028382	0.05			CCA:Pro	-0.0177364	0.00309616	0.00402356	0.0277888	0.0185297	0.0311013	0.00929089	0.0365262
CCC	16	0	0.05	0	0.05			CCC:Pro	0.10529	0.0423824	0.0392103	0.0689536	0.095857	0.068255	0.0821067	0.0910322
CCG	468.5	0.019481	0.05	0.019481	0.05			CCG:Pro	-0.019245	-0.00763224	0.0148509	0.0193856	0.0193636	0.00994767	0.0162488	0.0487649
CCT	1240	0	0.05	0	0.05			CCT:Pro	-0.0684188	-0.0378388	-0.0580679	-0.116133	-0.133743	-0.109303	-0.107593	-0.176259
Ser:AGC	1287.5	0	0.05	0	0.05			AGC:Ser	-0.0769537	-0.0914822	-0.0270028	-0.0840708	-0.0908988	-0.0524171	-0.0562669	-0.0473807
AGT	566.5	0.207235	0.05	0.207235	0.05			AGT:Ser	0.0213073	0.037783	0.00767584	0.0116574	-0.0338441	0.00241031	-0.0157507	0.0496245
TCA	460.5	0.015296	0.05	0.015296	0.05			TCA:Ser	-0.0380521	0.0306819	0.00850716	0.0296808	0.0295939	0.0214096	0.0193605	-0.00613556
TCC	562	0.188348	0.05	0.188348	0.05			TCC:Ser	-0.03367	-0.0277009	0.00836921	0.014548	0.0653055	0.0490897	0.044882	-0.0132789
TCG	1202.5	0	0.05	0	0.05			TCG:Ser	-0.0272899	-0.00771703	-0.00525125	-0.00658892	-0.0112821	-0.00951952	-0.0103752	0.0178412
TCT	277.5	5e-06	0.05	5e-06	0.05			TCT:Ser	0.15363	0.058486	0.00770364	0.0347759	0.0411083	-0.011012	0.0181415	-0.000728316
Thr:ACA	645.5	0.682955	0.05	0.682955	0.05			ACA:Thr	-0.00668555	0.0104958	-0.00413699	0.00369765	0.00980191	0.0220446	0.0115205	-0.00170145
ACC	912	0.013514	0.05	0.013514	0.05			ACC:Thr	-0.0574548	-0.0338926	-0.000729605	0.00344602	-0.00653138	-0.0194051	0.0142838	0.0121278
ACG	1254.5	0	0.05	0	0.05			ACG:Thr	-0.0214088	-0.00648965	-0.00660787	-0.014682	-0.0163393	-0.0131716	-0.0116683	-0.0115928
ACT	362.5	0.000399	0.05	0.000399	0.05			ACT:Thr	0.0854803	0.0298866	0.0114738	0.00753459	0.013069	0.0105344	-0.0141367	0.00115931
Tyr:TAC	1278.5	0	0.05	0	0.05			TAC:Tyr	0.000886587	-0.0381901	-0.0231718	-0.0367706	-0.0481491	-0.0367706	-0.0204544	-0.0358244
TAT	89	0	0.05	0	0.05			TAT:Tyr	-0.000886587	0.0381901	0.0231718	0.0367706	0.0481491	0.0367706	0.0204544	0.0358244
Val:GTA	144	0	0.05	0	0.05			GTA:Val	0.0151968	0.0254881	0.0162971	0.0356296	0.0268558	0.035595	0.0135585	0.00735746
GTC	1307	0	0.05	0	0.05			GTC:Val	-0.0190045	-0.019595	-0.0204522	-0.0273936	-0.056096	-0.0275089	-0.0328652	-0.0281626
GTG	704.5	0.838224	0.05	0.838224	0.05			GTG:Val	-0.0559796	-0.0401691	0.0065919	0.00601695	0.0447994	0.00645815	0.0295638	0.0311926
GTT	567	0.207235	0.05	0.207235	0.05			GTT:Val	0.0597788	0.0342871	-0.00243858	-0.0142517	-0.0155879	-0.0145476	-0.0102642	-0.0104262

## Sheet: NEW_C57BL6
	Average RSCU								RSCU Standard Deviation
	E10	E11	E12	E14	E15	E16	E18		E10	E11	E12	E14	E15	E16	E18
Ala:GCA	0.88483	0.885526	0.855268	0.833591	0.705965	0.774226	0.705882		0.442428	0.179029	0.171133	0.316444	0.407933	0.387127	0.407541
Ala:GCC	1.43785	1.44982	1.49672	1.51694	1.76211	1.43785	1.80392		0.71892	0.29032	0.299475	0.574971	1.01334	0.71892	1.04149
Ala:GCG	0.387113	0.44269	0.46316	0.354949	0.375439	0.331811	0.392157		0.193568	0.0916892	0.0954184	0.135508	0.217455	0.165916	0.226412
Ala:GCT	1.29021	1.22196	1.18485	1.29452	1.15649	1.45611	1.09804		0.645112	0.244491	0.237603	0.490844	0.667162	0.72804	0.633953
Arg:AGA	1.18571	1.20648	1.07224	1.10056	0.76785	1.16282	0.760563		0.592867	0.241486	0.21448	0.428591	0.443283	0.581799	0.439111
Arg:AGG	1.07792	1.08291	1.07224	1.11198	1.06434	1.04962	1.09859		0.538976	0.21875	0.21448	0.420487	0.614461	0.525193	0.634272
Arg:CGA	0.862338	0.767761	0.750568	0.742977	0.682533	0.787561	0.676056		0.431191	0.153678	0.150137	0.282566	0.394194	0.393805	0.390321
Arg:CGC	1.07792	1.20648	1.28214	1.27928	1.78318	1.12509	1.77465		0.538976	0.241486	0.256939	0.502415	1.02507	0.562557	1.02459
Arg:CGG	1.14935	1.0968	1.17946	1.0614	0.853167	1.08735	0.84507		0.574882	0.219535	0.235928	0.403302	0.49233	0.544089	0.487902
Arg:CGT	0.646753	0.639562	0.643344	0.703815	0.848931	0.787561	0.84507		0.323401	0.133088	0.128689	0.268742	0.489887	0.393805	0.487902
Asn:AAC	1.13228	1.14286	1.18431	1.16957	1.23939	1.2	1.22581		0.566167	0.228571	0.237097	0.442435	0.715226	0.6	0.70772
Asn:AAT	0.867725	0.857143	0.815686	0.830426	0.760606	0.8	0.774194		0.433953	0.171429	0.163488	0.314506	0.439125	0.4	0.446981
Asp:GAC	1.0566	1.05999	1.09434	1.11213	1.26316	1.08	1.26316		0.528302	0.212121	0.218868	0.422652	0.728708	0.54	0.729285
Asp:GAT	0.943396	0.94001	0.90566	0.887872	0.736842	0.92	0.736842		0.471698	0.188142	0.181132	0.338826	0.425444	0.46	0.425416
Cys:TGC	1.05882	1.05882	1.08497	1.13177	1.30303	1.11111	1.33333		0.529412	0.211765	0.218421	0.429335	0.751855	0.555556	0.7698
Cys:TGT	0.941176	0.941176	0.915033	0.868226	0.69697	0.888889	0.666667		0.470588	0.188235	0.184723	0.330495	0.402478	0.444444	0.3849
Glu:GAA	0.808889	0.799297	0.76574	0.755269	0.589648	0.800085	0.57971		0.404521	0.160146	0.153225	0.288804	0.340913	0.400191	0.334696
Glu:GAG	1.19111	1.2007	1.23426	1.24473	1.41035	1.19991	1.42029		0.59557	0.240325	0.246898	0.472039	0.813449	0.599982	0.820005
Gln:CAA	0.454545	0.45851	0.43957	0.444664	0.412415	0.468808	0.408163		0.227273	0.0918391	0.0896177	0.168313	0.238125	0.234442	0.235653
Gln:CAG	1.54545	1.54149	1.56043	1.55534	1.58759	1.53119	1.59184		0.772727	0.308335	0.312523	0.587901	0.916582	0.765594	0.919047
Gly:GGA	1.00914	1.00469	0.968238	0.962181	0.832432	0.983487	0.816364		0.504638	0.201039	0.193966	0.36699	0.480486	0.49175	0.471325
Gly:GGC	1.35778	1.37663	1.4383	1.43358	1.7445	1.24642	1.7686		0.678887	0.275809	0.288052	0.549018	1.00408	0.62323	1.02095
Gly:GGG	0.807154	0.837246	0.84627	0.7765	0.805405	0.590636	0.816364		0.40367	0.167534	0.169726	0.295824	0.464999	0.295583	0.471325
Gly:GGT	0.825933	0.781429	0.747196	0.827742	0.617658	1.17946	0.598667		0.41306	0.156366	0.150091	0.326448	0.356844	0.589825	0.345645
His:CAC	1.18182	1.16558	1.18182	1.24834	1.42784	1.2	1.44828		0.590909	0.23383	0.236364	0.475244	0.824136	0.6	0.836162
His:CAT	0.818182	0.834416	0.818182	0.751655	0.572158	0.8	0.551724		0.409091	0.167908	0.163636	0.291387	0.330486	0.4	0.318538
Ile:ATA	0.357278	0.348837	0.355413	0.352279	0.3	0.315935	0.3		0.178738	0.0697674	0.0711601	0.135594	0.173205	0.158079	0.173205
Ile:ATC	1.52382	1.53488	1.57835	1.5909	1.7625	1.60532	1.725		0.761885	0.306977	0.31592	0.602418	1.01665	0.802614	0.995929
Ile:ATT	1.1189	1.11628	1.06624	1.05682	0.9375	1.07875	0.975		0.559499	0.223256	0.213466	0.400486	0.540943	0.539451	0.562917
Leu:CTA	0.437305	0.406196	0.401743	0.39164	0.248382	0.376662	0.246575		0.218692	0.0869897	0.0852448	0.154318	0.143465	0.188398	0.14236
Leu:CTC	1.14145	1.14745	1.1973	1.19121	1.4075	1.20532	1.39726		0.570785	0.229572	0.239982	0.451861	0.812163	0.602688	0.806709
Leu:CTG	2.45337	2.51004	2.57048	2.55398	2.77274	2.56035	2.79452		1.22667	0.502167	0.515291	0.965774	1.60063	1.27998	1.61342
Leu:CTT	0.801725	0.78887	0.750913	0.759937	0.620099	0.828656	0.657534		0.400905	0.157833	0.152434	0.289193	0.358213	0.414406	0.379628
Leu:TTA	0.364421	0.358577	0.30484	0.330639	0.206129	0.30133	0.164384		0.182246	0.0717433	0.0676982	0.128007	0.123144	0.150723	0.0949069
Leu:TTG	0.801725	0.78887	0.774723	0.772595	0.745147	0.727683	0.739726		0.400905	0.157833	0.155295	0.292513	0.430212	0.364241	0.427081
Lys:AAA	0.73954	0.725458	0.709147	0.723072	0.636054	0.718615	0.636364		0.36981	0.14526	0.141864	0.274022	0.367286	0.359331	0.367405
Lys:AAG	1.26046	1.27454	1.29085	1.27693	1.36395	1.28139	1.36364		0.630233	0.254999	0.258189	0.482941	0.787324	0.640694	0.787296
Phe:TTC	1.09091	1.11765	1.15003	1.20246	1.44236	1.16129	1.46667		0.545455	0.223529	0.230581	0.458837	0.831522	0.580645	0.84678
Phe:TTT	0.909091	0.882353	0.84997	0.797544	0.557645	0.83871	0.533333		0.454545	0.176471	0.170792	0.309481	0.322845	0.419355	0.30792
Pro:CCA	1.12714	1.10345	1.08337	1.08946	0.94	0.940257	0.932127		0.563581	0.22069	0.21736	0.412176	0.541884	0.470469	0.538145
Pro:CCC	1.149	1.17241	1.19726	1.20071	1.41231	1.16491	1.43665		0.574558	0.234483	0.240221	0.45612	0.814981	0.58247	0.82911
Pro:CCG	0.397814	0.482759	0.47909	0.355491	0.313846	0.313419	0.310709		0.198924	0.0965517	0.0960981	0.134703	0.18126	0.157003	0.179403
Pro:CCT	1.32605	1.24138	1.24028	1.35433	1.33385	1.58141	1.32051		0.663024	0.248276	0.24864	0.5135	0.769751	0.790559	0.762316
Ser:AGC	1.39892	1.46079	1.48913	1.46376	1.55696	1.47847	1.53659		0.69943	0.292525	0.298886	0.553567	0.898051	0.739169	0.887148
Ser:AGT	0.968649	0.9198	0.859391	0.879262	0.721519	0.938431	0.658537		0.484335	0.186436	0.172351	0.336035	0.416638	0.469228	0.380206
Ser:TCA	0.807207	0.769682	0.758746	0.706502	0.493671	0.767807	0.512195		0.403616	0.154624	0.153637	0.273343	0.285889	0.383918	0.295716
Ser:TCC	1.2645	1.28893	1.34583	1.38085	1.67089	1.27968	1.68293		0.632303	0.258116	0.270155	0.527625	0.961032	0.639841	0.971638
Ser:TCG	0.322883	0.343715	0.343756	0.319545	0.265823	0.255936	0.292683		0.161451	0.0688387	0.068949	0.121078	0.156485	0.127977	0.168981
Ser:TCT	1.23784	1.21709	1.20315	1.25008	1.29114	1.27968	1.31707		0.619025	0.244517	0.24127	0.473121	0.74544	0.639841	0.760413
Thr:ACA	1.12762	1.10862	1.08333	1.07019	0.850427	1.02128	0.864865		0.563825	0.222348	0.216667	0.405141	0.490312	0.510638	0.49933
Thr:ACC	1.42259	1.43194	1.5	1.5473	1.92308	1.53191	1.94595		0.711264	0.287174	0.3	0.587605	1.10613	0.765957	1.12349
Thr:ACG	0.402721	0.42116	0.416667	0.384672	0.320513	0.425532	0.324324		0.201386	0.084485	0.0833333	0.147205	0.185302	0.212766	0.187249
Thr:ACT	1.04707	1.03828	1	0.997835	0.905983	1.02128	0.864865		0.523558	0.209012	0.2	0.378768	0.523011	0.510638	0.49933
Tyr:TAC	1.15385	1.16952	1.18519	1.24833	1.41739	1.22246	1.41566		0.576923	0.234376	0.237037	0.47452	0.818167	0.611261	0.817306
Tyr:TAT	0.846154	0.830484	0.814815	0.751666	0.582609	0.777536	0.584343		0.423077	0.166783	0.162963	0.289866	0.33647	0.388998	0.337385
Val:GTA	0.434054	0.40565	0.407374	0.404517	0.336129	0.428571	0.307692		0.2183	0.0811679	0.0815205	0.154525	0.195729	0.214286	0.177646
Val:GTC	0.960062	0.946516	0.950539	0.982859	1.08456	1	1.07692		0.480049	0.189388	0.190209	0.372388	0.625369	0.5	0.621762
Val:GTG	1.85155	1.90414	1.96035	1.90784	2.01887	1.85714	2.07692		0.925728	0.381017	0.392247	0.721631	1.16534	0.928571	1.19911
Val:GTT	0.754335	0.743691	0.681734	0.704779	0.560447	0.714286	0.538462		0.377188	0.148806	0.136798	0.271005	0.32398	0.357143	0.310881

[truncated: 17 more sheets: DEW_C57BL6, DHW_C57BL6, NHW_C57BL6, DLW_C57BL6, NLW_C57BL6, DEW_C57BL6J, NEW_C57BL6J, DHW_C57BL6J, NHW_C57BL6J, DLW_C57BL6J, NLW_C57BL6J, DEW_C57BL6N, NEW_C57BL6N, DHW_CD1, NHW_CD1, DLW_CD1, NLW_CD1]
