# Supplementary material for: Uncovering codon usage patterns during murine embryogenesis and tissue-specific developmental diseases
Source: Front Genet. 2025 May 26;16:1554773. doi: 10.3389/fgene.2025.1554773 (PMC12146342; doi:10.3389/fgene.2025.1554773)
Supplement: Supplementary file 2 [file Table3.xlsx]

## Sheet: NEW_DEW_E10_C57BL6N
	stat	pvalues	alpha	new_pvalues	bonf_alpha			Table Legend:
Ala:GCA	0	0.1	0.05	0.1	0.05			Comparisons are shown as their acronym. For examle, healthy (normal) liver weighted samples are labelled as ‘NLW’ and diseased liver weighted samples are labelled as ‘DLW’.
GCC	9	0.1	0.05	0.1	0.05			stat' is the statistic value.
GCG	6	0.7	0.05	0.7	0.05			pvalues' are the raw pvalues.
GCT	0	0.1	0.05	0.1	0.05			alpha' are the raw alpha values.
Arg:AGA	0	0.1	0.05	0.1	0.05			new_pvalues' are the adjusted pvalues.
AGG	0.5	0.2	0.05	0.2	0.05			bonf_alpha' are the adjusted alpha values.
CGA	3	0.7	0.05	0.7	0.05
CGC	9	0.1	0.05	0.1	0.05
CGG	9	0.1	0.05	0.1	0.05
CGT	0	0.1	0.05	0.1	0.05
Asn:AAC	9	0.1	0.05	0.1	0.05				C57BL/6N
AAT	0	0.1	0.05	0.1	0.05				CD-1
Asp:GAC	9	0.1	0.05	0.1	0.05				C57BL/6J
GAT	0	0.1	0.05	0.1	0.05				C57BL/6
Cys:TGC	9	0.1	0.05	0.1	0.05
TGT	0	0.1	0.05	0.1	0.05
Gln:GAA	0	0.1	0.05	0.1	0.05			Table S3: Relative Synonymous Codon Usage (RSCU) Statistical Comparison of Tissue Weighted Mouse Samples and Their Embryonic Stages.
GAG	9	0.1	0.05	0.1	0.05
Glu:CAA	1.5	0.4	0.05	0.4	0.05
CAG	7.5	0.4	0.05	0.4	0.05
Gly:GGA	0	0.1	0.05	0.1	0.05
GGC	6	0.7	0.05	0.7	0.05
GGG	6	0.7	0.05	0.7	0.05
GGT	3	0.7	0.05	0.7	0.05
His:CAC	9	0.1	0.05	0.1	0.05
CAT	0	0.1	0.05	0.1	0.05
Ile:ATA	0	0.1	0.05	0.1	0.05
ATC	9	0.1	0.05	0.1	0.05
ATT	0	0.1	0.05	0.1	0.05
Leu:CTA	0	0.1	0.05	0.1	0.05
CTC	9	0.1	0.05	0.1	0.05
CTG	7	0.4	0.05	0.4	0.05
CTT	9	0.1	0.05	0.1	0.05
TTA	0	0.1	0.05	0.1	0.05
TTG	0	0.1	0.05	0.1	0.05
Lys:AAA	0	0.1	0.05	0.1	0.05
AAG	9	0.1	0.05	0.1	0.05
Phe:TTC	9	0.1	0.05	0.1	0.05
TTT	0	0.1	0.05	0.1	0.05
Pro:CCA	0	0.1	0.05	0.1	0.05
CCC	7	0.4	0.05	0.4	0.05
CCG	9	0.1	0.05	0.1	0.05
CCT	3	0.7	0.05	0.7	0.05
Ser:AGC	9	0.1	0.05	0.1	0.05
AGT	0	0.1	0.05	0.1	0.05
TCA	0.5	0.2	0.05	0.2	0.05
TCC	6	0.7	0.05	0.7	0.05
TCG	3.5	1	0.05	1	0.05
TCT	0	0.1	0.05	0.1	0.05
Thr:ACA	0	0.1	0.05	0.1	0.05
ACC	9	0.1	0.05	0.1	0.05
ACG	9	0.1	0.05	0.1	0.05
ACT	0	0.1	0.05	0.1	0.05
Tyr:TAC	9	0.1	0.05	0.1	0.05
TAT	0	0.1	0.05	0.1	0.05
Val:GTA	0	0.1	0.05	0.1	0.05
GTC	9	0.1	0.05	0.1	0.05
GTG	9	0.1	0.05	0.1	0.05
GTT	0	0.1	0.05	0.1	0.05

## Sheet: NEW_DEW_E12_C57BL6N
	stat	pvalues	alpha	new_pvalues	bonf_alpha
Ala:GCA	0	0.1	0.05	0.1	0.05
GCC	9	0.1	0.05	0.1	0.05
GCG	4	1	0.05	1	0.05
GCT	0	0.1	0.05	0.1	0.05
Arg:AGA	0	0.1	0.05	0.1	0.05
AGG	6.5	0.7	0.05	0.7	0.05
CGA	2.5	0.7	0.05	0.7	0.05
CGC	9	0.1	0.05	0.1	0.05
CGG	0.5	0.2	0.05	0.2	0.05
CGT	7.5	0.4	0.05	0.4	0.05
Asn:AAC	0	0.1	0.05	0.1	0.05
AAT	9	0.1	0.05	0.1	0.05
Asp:GAC	9	0.1	0.05	0.1	0.05
GAT	0	0.1	0.05	0.1	0.05
Cys:TGC	9	0.1	0.05	0.1	0.05
TGT	0	0.1	0.05	0.1	0.05
Gln:GAA	0	0.1	0.05	0.1	0.05
GAG	9	0.1	0.05	0.1	0.05
Glu:CAA	9	0.1	0.05	0.1	0.05
CAG	0	0.1	0.05	0.1	0.05
Gly:GGA	0	0.1	0.05	0.1	0.05
GGC	9	0.1	0.05	0.1	0.05
GGG	0	0.1	0.05	0.1	0.05
GGT	0	0.1	0.05	0.1	0.05
His:CAC	9	0.1	0.05	0.1	0.05
CAT	0	0.1	0.05	0.1	0.05
Ile:ATA	0	0.1	0.05	0.1	0.05
ATC	8	0.2	0.05	0.2	0.05
ATT	2	0.4	0.05	0.4	0.05
Leu:CTA	0	0.1	0.05	0.1	0.05
CTC	9	0.1	0.05	0.1	0.05
CTG	7	0.4	0.05	0.4	0.05
CTT	2	0.4	0.05	0.4	0.05
TTA	0	0.1	0.05	0.1	0.05
TTG	9	0.1	0.05	0.1	0.05
Lys:AAA	0	0.1	0.05	0.1	0.05
AAG	9	0.1	0.05	0.1	0.05
Phe:TTC	9	0.1	0.05	0.1	0.05
TTT	0	0.1	0.05	0.1	0.05
Pro:CCA	0	0.1	0.05	0.1	0.05
CCC	9	0.1	0.05	0.1	0.05
CCG	0	0.1	0.05	0.1	0.05
CCT	5.5	1	0.05	1	0.05
Ser:AGC	0	0.1	0.05	0.1	0.05
AGT	0	0.1	0.05	0.1	0.05
TCA	0	0.1	0.05	0.1	0.05
TCC	9	0.1	0.05	0.1	0.05
TCG	0	0.1	0.05	0.1	0.05
TCT	9	0.1	0.05	0.1	0.05
Thr:ACA	0	0.1	0.05	0.1	0.05
ACC	9	0.1	0.05	0.1	0.05
ACG	0	0.1	0.05	0.1	0.05
ACT	3	0.7	0.05	0.7	0.05
Tyr:TAC	9	0.1	0.05	0.1	0.05
TAT	0	0.1	0.05	0.1	0.05
Val:GTA	0	0.1	0.05	0.1	0.05
GTC	9	0.1	0.05	0.1	0.05
GTG	9	0.1	0.05	0.1	0.05
GTT	0	0.1	0.05	0.1	0.05

## Sheet: NEW_DEW_E14_C57BL6N
	stat	pvalues	alpha	new_pvalues	bonf_alpha
Ala:GCA	0	0.1	0.05	0.1	0.05
GCC	9	0.1	0.05	0.1	0.05
GCG	0	0.1	0.05	0.1	0.05
GCT	0	0.1	0.05	0.1	0.05
Arg:AGA	3	0.7	0.05	0.7	0.05
AGG	9	0.1	0.05	0.1	0.05
CGA	0	0.1	0.05	0.1	0.05
CGC	9	0.1	0.05	0.1	0.05
CGG	0	0.1	0.05	0.1	0.05
CGT	2	0.4	0.05	0.4	0.05
Asn:AAC	0	0.1	0.05	0.1	0.05
AAT	9	0.1	0.05	0.1	0.05
Asp:GAC	9	0.1	0.05	0.1	0.05
GAT	0	0.1	0.05	0.1	0.05
Cys:TGC	9	0.1	0.05	0.1	0.05
TGT	0	0.1	0.05	0.1	0.05
Gln:GAA	0	0.1	0.05	0.1	0.05
GAG	9	0.1	0.05	0.1	0.05
Glu:CAA	6	0.7	0.05	0.7	0.05
CAG	3	0.7	0.05	0.7	0.05
Gly:GGA	0	0.1	0.05	0.1	0.05
GGC	9	0.1	0.05	0.1	0.05
GGG	0	0.1	0.05	0.1	0.05
GGT	0	0.1	0.05	0.1	0.05
His:CAC	9	0.1	0.05	0.1	0.05
CAT	0	0.1	0.05	0.1	0.05
Ile:ATA	3	0.7	0.05	0.7	0.05
ATC	9	0.1	0.05	0.1	0.05
ATT	0	0.1	0.05	0.1	0.05
Leu:CTA	0	0.1	0.05	0.1	0.05
CTC	9	0.1	0.05	0.1	0.05
CTG	2	0.4	0.05	0.4	0.05
CTT	6	0.7	0.05	0.7	0.05
TTA	0	0.1	0.05	0.1	0.05
TTG	9	0.1	0.05	0.1	0.05
Lys:AAA	0	0.1	0.05	0.1	0.05
AAG	9	0.1	0.05	0.1	0.05
Phe:TTC	9	0.1	0.05	0.1	0.05
TTT	0	0.1	0.05	0.1	0.05
Pro:CCA	0	0.1	0.05	0.1	0.05
CCC	9	0.1	0.05	0.1	0.05
CCG	0	0.1	0.05	0.1	0.05
CCT	8	0.2	0.05	0.2	0.05
Ser:AGC	0	0.1	0.05	0.1	0.05
AGT	0	0.1	0.05	0.1	0.05
TCA	0	0.1	0.05	0.1	0.05
TCC	9	0.1	0.05	0.1	0.05
TCG	0	0.1	0.05	0.1	0.05
TCT	9	0.1	0.05	0.1	0.05
Thr:ACA	0	0.1	0.05	0.1	0.05
ACC	9	0.1	0.05	0.1	0.05
ACG	0	0.1	0.05	0.1	0.05
ACT	3	0.7	0.05	0.7	0.05
Tyr:TAC	9	0.1	0.05	0.1	0.05
TAT	0	0.1	0.05	0.1	0.05
Val:GTA	0	0.1	0.05	0.1	0.05
GTC	9	0.1	0.05	0.1	0.05
GTG	3	0.7	0.05	0.7	0.05
GTT	0	0.1	0.05	0.1	0.05

## Sheet: NEW_DEW_E16_C57BL6N
	stat	pvalues	alpha	new_pvalues	bonf_alpha
Ala:GCA	0	0.1	0.05	0.1	0.05
GCC	9	0.1	0.05	0.1	0.05
GCG	0	0.1	0.05	0.1	0.05
GCT	0	0.1	0.05	0.1	0.05
Arg:AGA	6	0.7	0.05	0.7	0.05
AGG	7	0.4	0.05	0.4	0.05
CGA	0	0.1	0.05	0.1	0.05
CGC	9	0.1	0.05	0.1	0.05
CGG	0	0.1	0.05	0.1	0.05
CGT	3	0.7	0.05	0.7	0.05
Asn:AAC	0	0.1	0.05	0.1	0.05
AAT	9	0.1	0.05	0.1	0.05
Asp:GAC	9	0.1	0.05	0.1	0.05
GAT	0	0.1	0.05	0.1	0.05
Cys:TGC	9	0.1	0.05	0.1	0.05
TGT	0	0.1	0.05	0.1	0.05
Gln:GAA	0	0.1	0.05	0.1	0.05
GAG	9	0.1	0.05	0.1	0.05
Glu:CAA	7.5	0.4	0.05	0.4	0.05
CAG	1.5	0.4	0.05	0.4	0.05
Gly:GGA	0	0.1	0.05	0.1	0.05
GGC	9	0.1	0.05	0.1	0.05
GGG	0	0.1	0.05	0.1	0.05
GGT	0	0.1	0.05	0.1	0.05
His:CAC	9	0.1	0.05	0.1	0.05
CAT	0	0.1	0.05	0.1	0.05
Ile:ATA	0	0.1	0.05	0.1	0.05
ATC	9	0.1	0.05	0.1	0.05
ATT	0	0.1	0.05	0.1	0.05
Leu:CTA	0	0.1	0.05	0.1	0.05
CTC	9	0.1	0.05	0.1	0.05
CTG	0	0.1	0.05	0.1	0.05
CTT	9	0.1	0.05	0.1	0.05
TTA	0	0.1	0.05	0.1	0.05
TTG	9	0.1	0.05	0.1	0.05
Lys:AAA	0	0.1	0.05	0.1	0.05
AAG	9	0.1	0.05	0.1	0.05
Phe:TTC	9	0.1	0.05	0.1	0.05
TTT	0	0.1	0.05	0.1	0.05
Pro:CCA	0	0.1	0.05	0.1	0.05
CCC	9	0.1	0.05	0.1	0.05
CCG	0	0.1	0.05	0.1	0.05
CCT	8	0.2	0.05	0.2	0.05
Ser:AGC	0	0.1	0.05	0.1	0.05
AGT	0	0.1	0.05	0.1	0.05
TCA	0	0.1	0.05	0.1	0.05
TCC	9	0.1	0.05	0.1	0.05
TCG	0	0.1	0.05	0.1	0.05
TCT	9	0.1	0.05	0.1	0.05
Thr:ACA	0	0.1	0.05	0.1	0.05
ACC	9	0.1	0.05	0.1	0.05
ACG	0	0.1	0.05	0.1	0.05
ACT	1	0.2	0.05	0.2	0.05
Tyr:TAC	9	0.1	0.05	0.1	0.05
TAT	0	0.1	0.05	0.1	0.05
Val:GTA	0	0.1	0.05	0.1	0.05
GTC	9	0.1	0.05	0.1	0.05
GTG	0	0.1	0.05	0.1	0.05
GTT	0	0.1	0.05	0.1	0.05

## Sheet: NLW_DLW_E10
	stat	pvalues	alpha	new_pvalues	bonf_alpha		Effect Size
Ala:GCA	13	0.2	0.05	0.2	0.05		-0.0428903
GCC	5	0.485714	0.05	0.485714	0.05		0.00954319
GCG	16	0.028571	0.05	0.028571	0.05		-0.0540649
GCT	0	0.028571	0.05	0.028571	0.05		0.0874313
Arg:AGA	5.5	0.685714	0.05	0.685714	0.05		0.0348601
AGG	1	0.057143	0.05	0.057143	0.05		0.102123
CGA	15.5	0.057143	0.05	0.057143	0.05		-0.0425869
CGC	15	0.057143	0.05	0.057143	0.05		-0.0351376
CGG	16	0.028571	0.05	0.028571	0.05		-0.0779302
CGT	3.5	0.342857	0.05	0.342857	0.05		0.0186298
Asn:AAC	11	0.485714	0.05	0.485714	0.05		-0.0105276
AAT	3.5	0.342857	0.05	0.342857	0.05		0.0105276
Asp:GAC	16	0.028571	0.05	0.028571	0.05		-0.0394931
GAT	0	0.028571	0.05	0.028571	0.05		0.0394931
Cys:TGC	16	0.028571	0.05	0.028571	0.05		-0.0291162
TGT	0	0.028571	0.05	0.028571	0.05		0.0291162
Gln:GAA	14	0.114286	0.05	0.114286	0.05		-0.011735
GAG	2	0.114286	0.05	0.114286	0.05		0.011735
Glu:CAA	15	0.057143	0.05	0.057143	0.05		-0.0194992
CAG	1	0.057143	0.05	0.057143	0.05		0.0194992
Gly:GGA	11	0.485714	0.05	0.485714	0.05		-0.0147789
GGC	7	0.885714	0.05	0.885714	0.05		-0.00235193
GGG	10	0.685714	0.05	0.685714	0.05		-0.011687
GGT	4	0.342857	0.05	0.342857	0.05		0.02881
His:CAC	15	0.057143	0.05	0.057143	0.05		-0.0364993
CAT	1	0.057143	0.05	0.057143	0.05		0.0364993
Ile:ATA	8	1	0.05	1	0.05		0
ATC	16	0.028571	0.05	0.028571	0.05		-0.0608119
ATT	0	0.028571	0.05	0.028571	0.05		0.0608092
Leu:CTA	8.5	1	0.05	1	0.05		-0.00211823
CTC	16	0.028571	0.05	0.028571	0.05		-0.0662095
CTG	2	0.114286	0.05	0.114286	0.05		0.0666596
CTT	16	0.028571	0.05	0.028571	0.05		-0.0752222
TTA	11	0.485714	0.05	0.485714	0.05		-0.0365924
TTG	0	0.028571	0.05	0.028571	0.05		0.113414
Lys:AAA	16	0.028571	0.05	0.028571	0.05		-0.049141
AAG	0	0.028571	0.05	0.028571	0.05		0.049141
Phe:TTC	16	0.028571	0.05	0.028571	0.05		-0.0375731
TTT	0	0.028571	0.05	0.028571	0.05		0.0375731
Pro:CCA	4	0.342857	0.05	0.342857	0.05		0.0276683
CCC	1	0.057143	0.05	0.057143	0.05		0.0494715
CCG	16	0.028571	0.05	0.028571	0.05		-0.0483743
CCT	15	0.057143	0.05	0.057143	0.05		-0.0287857
Ser:AGC	10.5	0.685714	0.05	0.685714	0.05		-0.0199702
AGT	0.5	0.057143	0.05	0.057143	0.05		0.0461909
TCA	14	0.114286	0.05	0.114286	0.05		-0.0773056
TCC	4.5	0.485714	0.05	0.485714	0.05		0.00727684
TCG	16	0.028571	0.05	0.028571	0.05		-0.0553935
TCT	0	0.028571	0.05	0.028571	0.05		0.0992041
Thr:ACA	5	0.485714	0.05	0.485714	0.05		0.0112151
ACC	16	0.028571	0.05	0.028571	0.05		-0.0537167
ACG	13	0.2	0.05	0.2	0.05		-0.0380183
ACT	0	0.028571	0.05	0.028571	0.05		0.0805297
Tyr:TAC	8	1	0.05	1	0.05		-0.00584142
TAT	8	1	0.05	1	0.05		0.00584142
Val:GTA	10.5	0.685714	0.05	0.685714	0.05		0.00579301
GTC	16	0.028571	0.05	0.028571	0.05		-0.0596503
GTG	9.5	0.885714	0.05	0.885714	0.05		-0.0164413
GTT	0	0.028571	0.05	0.028571	0.05		0.0702939

## Sheet: NLW_DLW_E11
	stat	pvalues	alpha	new_pvalues	bonf_alpha		Effect Size
Ala:GCA	11	0.84127	0.05	0.84127	0.05		-0.0285214
GCC	20	0.150794	0.05	0.150794	0.05		0.00833941
GCG	21	0.095238	0.05	0.095238	0.05		-0.03338
GCT	3	0.055556	0.05	0.055556	0.05		0.0535708
Arg:AGA	15	0.690476	0.05	0.690476	0.05		-0.0144822
AGG	4	0.095238	0.05	0.095238	0.05		0.103106
CGA	15	0.690476	0.05	0.690476	0.05		-0.0384071
CGC	10	0.690476	0.05	0.690476	0.05		-0.0182958
CGG	25	0.007937	0.05	0.007937	0.05		-0.0693553
CGT	10	0.690476	0.05	0.690476	0.05		0.0367861
Asn:AAC	20	0.150794	0.05	0.150794	0.05		-0.0130543
AAT	3	0.055556	0.05	0.055556	0.05		0.0130543
Asp:GAC	25	0.007937	0.05	0.007937	0.05		-0.0489638
GAT	0	0.007937	0.05	0.007937	0.05		0.0489638
Cys:TGC	12	1	0.05	1	0.05		-0.00243489
TGT	13	1	0.05	1	0.05		0.00243489
Gln:GAA	20	0.150794	0.05	0.150794	0.05		0.00697741
GAG	5	0.150794	0.05	0.150794	0.05		-0.00697741
Glu:CAA	21	0.095238	0.05	0.095238	0.05		-0.019925
CAG	3	0.055556	0.05	0.055556	0.05		0.019925
Gly:GGA	17.5	0.420635	0.05	0.420635	0.05		-0.0329596
GGC	12.5	1	0.05	1	0.05		0.0175068
GGG	14.5	0.84127	0.05	0.84127	0.05		-0.00797973
GGT	8	0.420635	0.05	0.420635	0.05		0.0234042
His:CAC	15.5	0.690476	0.05	0.690476	0.05		0.00298398
CAT	6.5	0.309524	0.05	0.309524	0.05		-0.00298398
Ile:ATA	11	0.84127	0.05	0.84127	0.05		0.00162454
ATC	25	0.007937	0.05	0.007937	0.05		-0.0389026
ATT	0	0.007937	0.05	0.007937	0.05		0.0372774
Leu:CTA	11	0.84127	0.05	0.84127	0.05		0.00052659
CTC	25	0.007937	0.05	0.007937	0.05		-0.0530559
CTG	4	0.095238	0.05	0.095238	0.05		0.105985
CTT	21	0.095238	0.05	0.095238	0.05		-0.0552602
TTA	15.5	0.690476	0.05	0.690476	0.05		-0.0227346
TTG	5	0.150794	0.05	0.150794	0.05		0.0228959
Lys:AAA	25	0.007937	0.05	0.007937	0.05		-0.0337007
AAG	0	0.007937	0.05	0.007937	0.05		0.0337007
Phe:TTC	24	0.015873	0.05	0.015873	0.05		-0.0263999
TTT	2	0.031746	0.05	0.031746	0.05		0.0263999
Pro:CCA	7	0.309524	0.05	0.309524	0.05		0.00288804
CCC	1	0.015873	0.05	0.015873	0.05		0.0706754
CCG	25	0.007937	0.05	0.007937	0.05		-0.0598986
CCT	16	0.547619	0.05	0.547619	0.05		-0.0138563
Ser:AGC	17	0.420635	0.05	0.420635	0.05		0.0270726
AGT	5	0.150794	0.05	0.150794	0.05		0.0039359
TCA	16.5	0.547619	0.05	0.547619	0.05		-0.0552571
TCC	11.5	1	0.05	1	0.05		-0.0233093
TCG	16	0.547619	0.05	0.547619	0.05		-0.0281299
TCT	1	0.015873	0.05	0.015873	0.05		0.0752756
Thr:ACA	8.5	0.547619	0.05	0.547619	0.05		-0.0146577
ACC	18	0.309524	0.05	0.309524	0.05		0.0190269
ACG	21	0.095238	0.05	0.095238	0.05		-0.0264725
ACT	5	0.150794	0.05	0.150794	0.05		0.021872
Tyr:TAC	16	0.547619	0.05	0.547619	0.05		-0.00736391
TAT	9	0.547619	0.05	0.547619	0.05		0.00736391
Val:GTA	11	0.84127	0.05	0.84127	0.05		-0.00211477
GTC	25	0.007937	0.05	0.007937	0.05		-0.0374174
GTG	19	0.222222	0.05	0.222222	0.05		0.012292
GTT	5	0.150794	0.05	0.150794	0.05		0.0271393

## Sheet: NLW_DLW_E12_CD1
	stat	pvalues	alpha	new_pvalues	bonf_alpha		Effect Size
Ala:GCA	16	0.028571	0.05	0.028571	0.05		-0.191816
GCC	0	0.028571	0.05	0.028571	0.05		0.0997589
GCG	16	0.028571	0.05	0.028571	0.05		-0.0611253
GCT	0	0.028571	0.05	0.028571	0.05		0.153187
Arg:AGA	16	0.028571	0.05	0.028571	0.05		-0.0706944
AGG	0	0.028571	0.05	0.028571	0.05		0.221638
CGA	16	0.028571	0.05	0.028571	0.05		-0.109185
CGC	16	0.028571	0.05	0.028571	0.05		-0.109443
CGG	16	0.028571	0.05	0.028571	0.05		-0.123717
CGT	0	0.028571	0.05	0.028571	0.05		0.191135
Asn:AAC	8	1	0.05	1	0.05		-0.000136315
AAT	8	1	0.05	1	0.05		0.000136315
Asp:GAC	16	0.028571	0.05	0.028571	0.05		-0.104565
GAT	0	0.028571	0.05	0.028571	0.05		0.104565
Cys:TGC	0	0.028571	0.05	0.028571	0.05		0.0394656
TGT	16	0.028571	0.05	0.028571	0.05		-0.0394656
Gln:GAA	0	0.028571	0.05	0.028571	0.05		0.0499515
GAG	16	0.028571	0.05	0.028571	0.05		-0.0499515
Glu:CAA	16	0.028571	0.05	0.028571	0.05		-0.0321955
CAG	0	0.028571	0.05	0.028571	0.05		0.0321955
Gly:GGA	16	0.028571	0.05	0.028571	0.05		-0.119802
GGC	0	0.028571	0.05	0.028571	0.05		0.0619458
GGG	16	0.028571	0.05	0.028571	0.05		-0.113182
GGT	0	0.028571	0.05	0.028571	0.05		0.171019
His:CAC	0	0.028571	0.05	0.028571	0.05		0.0918184
CAT	16	0.028571	0.05	0.028571	0.05		-0.0918184
Ile:ATA	0	0.028571	0.05	0.028571	0.05		0.0510667
ATC	16	0.028571	0.05	0.028571	0.05		-0.0850352
ATT	0	0.028571	0.05	0.028571	0.05		0.0339724
Leu:CTA	16	0.028571	0.05	0.028571	0.05		-0.0776211
CTC	16	0.028571	0.05	0.028571	0.05		-0.0496773
CTG	0	0.028571	0.05	0.028571	0.05		0.384912
CTT	16	0.028571	0.05	0.028571	0.05		-0.133513
TTA	16	0.028571	0.05	0.028571	0.05		-0.0447247
TTG	16	0.028571	0.05	0.028571	0.05		-0.0794945
Lys:AAA	16	0.028571	0.05	0.028571	0.05		-0.0943281
AAG	0	0.028571	0.05	0.028571	0.05		0.0943281
Phe:TTC	16	0.028571	0.05	0.028571	0.05		-0.0247029
TTT	0	0.028571	0.05	0.028571	0.05		0.0247029
Pro:CCA	16	0.028571	0.05	0.028571	0.05		-0.141249
CCC	0	0.028571	0.05	0.028571	0.05		0.193314
CCG	16	0.028571	0.05	0.028571	0.05		-0.111379
CCT	0	0.028571	0.05	0.028571	0.05		0.0593095
Ser:AGC	0	0.028571	0.05	0.028571	0.05		0.337138
AGT	16	0.028571	0.05	0.028571	0.05		-0.132349
TCA	16	0.028571	0.05	0.028571	0.05		-0.19212
TCC	16	0.028571	0.05	0.028571	0.05		-0.13874
TCG	16	0.028571	0.05	0.028571	0.05		-0.0785333
TCT	0	0.028571	0.05	0.028571	0.05		0.204484
Thr:ACA	16	0.028571	0.05	0.028571	0.05		-0.152421
ACC	0	0.028571	0.05	0.028571	0.05		0.285981
ACG	16	0.028571	0.05	0.028571	0.05		-0.0783075
ACT	16	0.028571	0.05	0.028571	0.05		-0.0555042
Tyr:TAC	0	0.028571	0.05	0.028571	0.05		0.0404061
TAT	16	0.028571	0.05	0.028571	0.05		-0.0404061
Val:GTA	16	0.028571	0.05	0.028571	0.05		-0.00927738
GTC	16	0.028571	0.05	0.028571	0.05		-0.0680885
GTG	0	0.028571	0.05	0.028571	0.05		0.125458
GTT	16	0.028571	0.05	0.028571	0.05		-0.0480919

## Sheet: NLW_DLW_E13_CD1
	stat	pvalues	alpha	new_pvalues	bonf_alpha		Effect Size
Ala:GCA	25	0.007937	0.05	0.007937	0.05		-0.185401
GCC	0	0.007937	0.05	0.007937	0.05		0.122265
GCG	25	0.007937	0.05	0.007937	0.05		-0.0809765
GCT	0	0.007937	0.05	0.007937	0.05		0.144123
Arg:AGA	25	0.007937	0.05	0.007937	0.05		-0.0999133
AGG	0	0.007937	0.05	0.007937	0.05		0.216811
CGA	25	0.007937	0.05	0.007937	0.05		-0.16934
CGC	25	0.007937	0.05	0.007937	0.05		-0.0946967
CGG	25	0.007937	0.05	0.007937	0.05		-0.113266
CGT	0	0.007937	0.05	0.007937	0.05		0.260327
Asn:AAC	12	1	0.05	1	0.05		-0.00192471
AAT	13	1	0.05	1	0.05		0.00192471
Asp:GAC	25	0.007937	0.05	0.007937	0.05		-0.0960867
GAT	0	0.007937	0.05	0.007937	0.05		0.0960867
Cys:TGC	0	0.007937	0.05	0.007937	0.05		0.0700156
TGT	25	0.007937	0.05	0.007937	0.05		-0.0700156
Gln:GAA	0	0.007937	0.05	0.007937	0.05		0.06554
GAG	25	0.007937	0.05	0.007937	0.05		-0.06554
Glu:CAA	25	0.007937	0.05	0.007937	0.05		-0.0371234
CAG	0	0.007937	0.05	0.007937	0.05		0.0371234
Gly:GGA	25	0.007937	0.05	0.007937	0.05		-0.114258
GGC	0	0.007937	0.05	0.007937	0.05		0.0680925
GGG	25	0.007937	0.05	0.007937	0.05		-0.117767
GGT	0	0.007937	0.05	0.007937	0.05		0.163906
His:CAC	0	0.007937	0.05	0.007937	0.05		0.0875253
CAT	25	0.007937	0.05	0.007937	0.05		-0.0875253
Ile:ATA	0	0.007937	0.05	0.007937	0.05		0.0280527
ATC	25	0.007937	0.05	0.007937	0.05		-0.0537526
ATT	0.5	0.015873	0.05	0.015873	0.05		0.0257047
Leu:CTA	25	0.007937	0.05	0.007937	0.05		-0.0662408
CTC	25	0.007937	0.05	0.007937	0.05		-0.05378
CTG	0	0.007937	0.05	0.007937	0.05		0.427468
CTT	25	0.007937	0.05	0.007937	0.05		-0.138716
TTA	25	0.007937	0.05	0.007937	0.05		-0.0649921
TTG	25	0.007937	0.05	0.007937	0.05		-0.104351
Lys:AAA	25	0.007937	0.05	0.007937	0.05		-0.106069
AAG	0	0.007937	0.05	0.007937	0.05		0.106069
Phe:TTC	25	0.007937	0.05	0.007937	0.05		-0.0298836
TTT	0	0.007937	0.05	0.007937	0.05		0.0298836
Pro:CCA	25	0.007937	0.05	0.007937	0.05		-0.143135
CCC	0	0.007937	0.05	0.007937	0.05		0.183743
CCG	25	0.007937	0.05	0.007937	0.05		-0.0840812
CCT	0	0.007937	0.05	0.007937	0.05		0.0434544
Ser:AGC	0	0.007937	0.05	0.007937	0.05		0.368645
AGT	25	0.007937	0.05	0.007937	0.05		-0.146409
TCA	25	0.007937	0.05	0.007937	0.05		-0.243745
TCC	25	0.007937	0.05	0.007937	0.05		-0.15192
TCG	25	0.007937	0.05	0.007937	0.05		-0.0912747
TCT	0	0.007937	0.05	0.007937	0.05		0.264407
Thr:ACA	25	0.007937	0.05	0.007937	0.05		-0.175262
ACC	0	0.007937	0.05	0.007937	0.05		0.301593
ACG	25	0.007937	0.05	0.007937	0.05		-0.0327425
ACT	25	0.007937	0.05	0.007937	0.05		-0.0938213
Tyr:TAC	0	0.007937	0.05	0.007937	0.05		0.0526678
TAT	25	0.007937	0.05	0.007937	0.05		-0.0526678
Val:GTA	25	0.007937	0.05	0.007937	0.05		-0.0407902
GTC	25	0.007937	0.05	0.007937	0.05		-0.0408389
GTG	0	0.007937	0.05	0.007937	0.05		0.135639
GTT	25	0.007937	0.05	0.007937	0.05		-0.0540294

## Sheet: NLW_DLW_E14_CD1
	stat	pvalues	alpha	new_pvalues	bonf_alpha		Effect Size
Ala:GCA	16	0.028571	0.05	0.028571	0.05		-0.205396
GCC	0	0.028571	0.05	0.028571	0.05		0.121742
GCG	16	0.028571	0.05	0.028571	0.05		-0.094219
GCT	0	0.028571	0.05	0.028571	0.05		0.177838
Arg:AGA	14	0.114286	0.05	0.114286	0.05		-0.0363278
AGG	0	0.028571	0.05	0.028571	0.05		0.205415
CGA	16	0.028571	0.05	0.028571	0.05		-0.161424
CGC	16	0.028571	0.05	0.028571	0.05		-0.117368
CGG	16	0.028571	0.05	0.028571	0.05		-0.149916
CGT	0	0.028571	0.05	0.028571	0.05		0.259615
Asn:AAC	16	0.028571	0.05	0.028571	0.05		-0.0154752
AAT	0	0.028571	0.05	0.028571	0.05		0.0154752
Asp:GAC	16	0.028571	0.05	0.028571	0.05		-0.116771
GAT	0	0.028571	0.05	0.028571	0.05		0.116771
Cys:TGC	0	0.028571	0.05	0.028571	0.05		0.0515351
TGT	16	0.028571	0.05	0.028571	0.05		-0.0515351
Gln:GAA	0	0.028571	0.05	0.028571	0.05		0.0566074
GAG	16	0.028571	0.05	0.028571	0.05		-0.0566074
Glu:CAA	16	0.028571	0.05	0.028571	0.05		-0.0436679
CAG	0	0.028571	0.05	0.028571	0.05		0.0436679
Gly:GGA	16	0.028571	0.05	0.028571	0.05		-0.104547
GGC	0	0.028571	0.05	0.028571	0.05		0.094648
GGG	16	0.028571	0.05	0.028571	0.05		-0.152918
GGT	0	0.028571	0.05	0.028571	0.05		0.162815
His:CAC	0	0.028571	0.05	0.028571	0.05		0.106794
CAT	16	0.028571	0.05	0.028571	0.05		-0.106794
Ile:ATA	0	0.028571	0.05	0.028571	0.05		0.0403571
ATC	16	0.028571	0.05	0.028571	0.05		-0.0649267
ATT	3	0.2	0.05	0.2	0.05		0.0245977
Leu:CTA	16	0.028571	0.05	0.028571	0.05		-0.0696624
CTC	16	0.028571	0.05	0.028571	0.05		-0.0822453
CTG	0	0.028571	0.05	0.028571	0.05		0.432243
CTT	16	0.028571	0.05	0.028571	0.05		-0.138086
TTA	16	0.028571	0.05	0.028571	0.05		-0.0677587
TTG	16	0.028571	0.05	0.028571	0.05		-0.0746323
Lys:AAA	16	0.028571	0.05	0.028571	0.05		-0.114179
AAG	0	0.028571	0.05	0.028571	0.05		0.114179
Phe:TTC	16	0.028571	0.05	0.028571	0.05		-0.0620859
TTT	0	0.028571	0.05	0.028571	0.05		0.0620859
Pro:CCA	16	0.028571	0.05	0.028571	0.05		-0.111488
CCC	0	0.028571	0.05	0.028571	0.05		0.166438
CCG	16	0.028571	0.05	0.028571	0.05		-0.103204
CCT	0	0.028571	0.05	0.028571	0.05		0.04828
Ser:AGC	0	0.028571	0.05	0.028571	0.05		0.3896
AGT	16	0.028571	0.05	0.028571	0.05		-0.179468
TCA	16	0.028571	0.05	0.028571	0.05		-0.255629
TCC	16	0.028571	0.05	0.028571	0.05		-0.146098
TCG	16	0.028571	0.05	0.028571	0.05		-0.120803
TCT	0	0.028571	0.05	0.028571	0.05		0.312378
Thr:ACA	16	0.028571	0.05	0.028571	0.05		-0.168749
ACC	0	0.028571	0.05	0.028571	0.05		0.267489
ACG	16	0.028571	0.05	0.028571	0.05		-0.0400522
ACT	16	0.028571	0.05	0.028571	0.05		-0.0587355
Tyr:TAC	0	0.028571	0.05	0.028571	0.05		0.0600842
TAT	16	0.028571	0.05	0.028571	0.05		-0.0600842
Val:GTA	16	0.028571	0.05	0.028571	0.05		-0.0763022
GTC	16	0.028571	0.05	0.028571	0.05		-0.0726995
GTG	0	0.028571	0.05	0.028571	0.05		0.165779
GTT	16	0.028571	0.05	0.028571	0.05		-0.016788

## Sheet: NLW_DLW_E15_CD1
	stat	pvalues	alpha	new_pvalues	bonf_alpha		Effect Size
Ala:GCA	16	0.028571	0.05	0.028571	0.05		-0.203133
GCC	0	0.028571	0.05	0.028571	0.05		0.120313
GCG	16	0.028571	0.05	0.028571	0.05		-0.0959929
GCT	0	0.028571	0.05	0.028571	0.05		0.178792
Arg:AGA	10	0.685714	0.05	0.685714	0.05		0.00277133
AGG	0	0.028571	0.05	0.028571	0.05		0.151791
CGA	16	0.028571	0.05	0.028571	0.05		-0.161462
CGC	16	0.028571	0.05	0.028571	0.05		-0.108805
CGG	16	0.028571	0.05	0.028571	0.05		-0.204884
CGT	0	0.028571	0.05	0.028571	0.05		0.320204
Asn:AAC	16	0.028571	0.05	0.028571	0.05		-0.00213305
AAT	0	0.028571	0.05	0.028571	0.05		0.00213305
Asp:GAC	16	0.028571	0.05	0.028571	0.05		-0.119581
GAT	0	0.028571	0.05	0.028571	0.05		0.119581
Cys:TGC	0	0.028571	0.05	0.028571	0.05		0.072197
TGT	16	0.028571	0.05	0.028571	0.05		-0.072197
Gln:GAA	0	0.028571	0.05	0.028571	0.05		0.0760307
GAG	16	0.028571	0.05	0.028571	0.05		-0.0760307
Glu:CAA	16	0.028571	0.05	0.028571	0.05		-0.0522118
CAG	0	0.028571	0.05	0.028571	0.05		0.0522118
Gly:GGA	16	0.028571	0.05	0.028571	0.05		-0.0851279
GGC	0	0.028571	0.05	0.028571	0.05		0.058716
GGG	16	0.028571	0.05	0.028571	0.05		-0.16189
GGT	0	0.028571	0.05	0.028571	0.05		0.188299
His:CAC	0	0.028571	0.05	0.028571	0.05		0.0684447
CAT	16	0.028571	0.05	0.028571	0.05		-0.0684447
Ile:ATA	0	0.028571	0.05	0.028571	0.05		0.0199013
ATC	16	0.028571	0.05	0.028571	0.05		-0.0796018
ATT	0	0.028571	0.05	0.028571	0.05		0.0597026
Leu:CTA	16	0.028571	0.05	0.028571	0.05		-0.0452429
CTC	16	0.028571	0.05	0.028571	0.05		-0.0877186
CTG	0	0.028571	0.05	0.028571	0.05		0.39696
CTT	16	0.028571	0.05	0.028571	0.05		-0.111296
TTA	16	0.028571	0.05	0.028571	0.05		-0.0627401
TTG	16	0.028571	0.05	0.028571	0.05		-0.090378
Lys:AAA	16	0.028571	0.05	0.028571	0.05		-0.122373
AAG	0	0.028571	0.05	0.028571	0.05		0.122373
Phe:TTC	16	0.028571	0.05	0.028571	0.05		-0.0574874
TTT	0	0.028571	0.05	0.028571	0.05		0.0574874
Pro:CCA	16	0.028571	0.05	0.028571	0.05		-0.131484
CCC	0	0.028571	0.05	0.028571	0.05		0.205078
CCG	16	0.028571	0.05	0.028571	0.05		-0.132447
CCT	0	0.028571	0.05	0.028571	0.05		0.0588485
Ser:AGC	0	0.028571	0.05	0.028571	0.05		0.444237
AGT	16	0.028571	0.05	0.028571	0.05		-0.196596
TCA	16	0.028571	0.05	0.028571	0.05		-0.257002
TCC	16	0.028571	0.05	0.028571	0.05		-0.159013
TCG	16	0.028571	0.05	0.028571	0.05		-0.126968
TCT	0	0.028571	0.05	0.028571	0.05		0.295198
Thr:ACA	16	0.028571	0.05	0.028571	0.05		-0.144922
ACC	0	0.028571	0.05	0.028571	0.05		0.295997
ACG	16	0.028571	0.05	0.028571	0.05		-0.036171
ACT	16	0.028571	0.05	0.028571	0.05		-0.115011
Tyr:TAC	3	0.2	0.05	0.2	0.05		0.018589
TAT	13	0.2	0.05	0.2	0.05		-0.018589
Val:GTA	16	0.028571	0.05	0.028571	0.05		-0.0787742
GTC	16	0.028571	0.05	0.028571	0.05		-0.0514254
GTG	0	0.028571	0.05	0.028571	0.05		0.177656
GTT	16	0.028571	0.05	0.028571	0.05		-0.04747

[truncated: 45 more sheets: NLW_DLW_E16_CD1, NLW_DLW_E17_CD1, NLW_DLW_E18_CD1, NHW_DHW_E10_CD1, NHW_DHW_E11_CD1, NHW_DHW_E12_CD1, NHW_DHW_E13_CD1, NHW_DHW_E14_CD1, NHW_DHW_E15_CD1, NHW_DHW_E16_CD1, NHW_DHW_E17_CD1, NLW_DLW_E15_C57BL6J, NEW_DEW_E12_C57BL6J, NEW_DEW_E13, NEW_DEW_E14_C57BL6J, NEW_DEW_E15_C57BL6J, NEW_DEW_E17, NEW_DEW_E18_C57BL6J, NHW_DHW_E9, NHW_DHW_E11 …]
