# Supplementary material for: Uncovering codon usage patterns during murine embryogenesis and tissue-specific developmental diseases
Source: Front Genet. 2025 May 26;16:1554773. doi: 10.3389/fgene.2025.1554773 (PMC12146342; doi:10.3389/fgene.2025.1554773)
Supplement: Supplementary file 3 [file Table9.xlsx]

## Sheet: Table S9
Human	RSCU-Genomic		Table S9: Human Genomic Relative Synonymous Codon Usage (RSCU).
Ala:GCA	1.01184
GCC	1.51805
GCG	0.351794
GCT	1.11831
Arg:AGA	1.4387
AGG	1.30746
CGA	0.689052
CGC	0.935171
CGG	1.14007
CGT	0.489538
Asn:AAC	0.993321
AAT	1.00668
Asp:GAC	1.00327
GAT	0.996733
Cys:TGC	1.01673
TGT	0.983275
Gln:CAA	0.572961
CAG	1.42704
Glu:GAA	0.924326
GAG	1.07567
Gly:GGA	1.0917
GGC	1.25253
GGG	0.968992
GGT	0.686785
His:CAC	1.10252
CAT	0.897484
Ile:ATA	0.563689
ATC	1.29067
ATT	1.14564
Leu:CTA	0.459354
CTC	1.09302
CTG	2.21021
CTT	0.869469
TTA	0.541347
TTG	0.826601
Lys:AAA	0.932376
AAG	1.06762
Met:ATG	1
Phe:TTC	1.00823
TTT	0.991773
Pro:CCA	1.19384
CCC	1.19834
CCG	0.390865
CCT	1.21695
Ser:AGC	1.36836
AGT	0.978654
TCA	0.987344
TCC	1.20303
TCG	0.282178
TCT	1.18043
Stop:TAA	0.830173
TAG	0.658181
TGA	1.51165
Thr:ACA	1.22178
ACC	1.31078
ACG	0.412348
ACT	1.05509
Trp:TGG	1
Tyr:TAC	1.05129
TAT	0.948708
Val:GTA	0.52514
GTC	0.915821
GTG	1.75466
GTT	0.804375
