# Supplementary material for: Uncovering codon usage patterns during murine embryogenesis and tissue-specific developmental diseases
Source: Front Genet. 2025 May 26;16:1554773. doi: 10.3389/fgene.2025.1554773 (PMC12146342; doi:10.3389/fgene.2025.1554773)
Supplement: Supplementary file 5 [file Table6.xlsx]

## Sheet: C57BL6_NLW_DLW
Sample	target	E_time	PC 1	PC 2	Dendrogram	KMeans	DBSCAN	Spectral		Table Legend:
SRR392611	0	E14.5	-6.87108	7.36597	0	0	-1	0		Comparisons are shown as their acronym. For examle, healthy (normal) liver weighted samples are labelled as ‘NLW’ and diseased liver weighted samples are labelled as ‘DLW’.
SRR496255	0	E14.5	-6.90107	4.43705	0	0	-1	0		Sample' lists the samples by identifier.
SRR545906	0	E14.5	-6.69688	3.68371	0	0	-1	0		target' identifies whether the sample is weighted by healthy associated genes (1) or disease associated genes (0).
SRR567502	0	E14	-5.7327	1.3	0	0	-1	0		E_time' is the corresponding embryonic stage.
SRR9166077	0	E12.5	-5.90778	-0.0716622	0	0	-1	0		PC1' is the first principal component value for each sample.
SRR9166079	0	E14.5	-6.23978	-0.967197	0	0	-1	0		PC2' is the second principal component values for each sample.
SRR9166083	0	E18.5	-5.77286	-1.19922	0	0	0	0		Dendrogram' shows the clustering for the agglomerative results.
SRR9166082	0	E17.5	-5.61967	-1.26634	0	0	0	0		Kmeans', 'DBSCAN', and 'Spectral' show the clustering results.
SRR567497	0	E14.5	-5.82425	-1.32357	0	0	0	0
SRR9166080	0	E15.5	-5.8386	-1.39915	0	0	0	0
SRR9166081	0	E16.5	-5.5369	-3.04914	0	0	0	0			C57BL/6N
SRR9166078	0	E13.5	-5.30227	-3.87187	0	0	0	0			CD-1
SRR1462347	0	E17.5	-5.35501	-4.05091	0	0	0	0			C57BL/6J
SRR1462348	0	E17.5	-5.7337	-4.57922	0	0	0	0			C57BL/6
SRR392611	1	E14.5	7.67351	4.92006	1	1	-1	1
SRR545906	1	E14.5	1.66186	4.34114	1	1	-1	1
SRR496255	1	E14.5	5.1343	3.88437	1	1	-1	1		Table S6: Healthy vs Diseased Weighted PCA and Clustering Results.
SRR567502	1	E14	9.73194	2.40459	1	1	-1	1
SRR9166082	1	E17.5	2.94164	0.96748	1	1	-1	1
SRR9166083	1	E18.5	-1.46082	0.835584	1	0	-1	0
SRR9166080	1	E15.5	5.0596	0.071036	1	1	-1	1
SRR567497	1	E14.5	11.4678	-0.206905	1	1	-1	1
SRR9166077	1	E12.5	4.48049	-0.282761	1	1	-1	1
SRR9166079	1	E14.5	5.89828	-0.406626	1	1	-1	1
SRR9166081	1	E16.5	5.50378	-1.81155	1	1	-1	1
SRR9166078	1	E13.5	6.44023	-2.8642	1	1	-1	1
SRR1462348	1	E17.5	9.86929	-3.14917	1	1	-1	1
SRR1462347	1	E17.5	8.9306	-3.7115	1	1	-1	1

## Sheet: C57BL6J_NLW_DLW
Sample	target	E_time	PC 1	PC 2	PC 3	Dendrogram	KMeans	DBSCAN	Spectral
DRR009895	0	E15	-4.15706	0.640375	5.91138	0	2	-1	0
DRR009894	0	E15	-5.56985	0.593933	2.8953	0	2	-1	0
DRR009893	0	E15	-6.32058	0.317695	0.776932	0	2	-1	0
DRR009892	0	E15	-6.40713	-0.519331	-1.32667	0	2	-1	0
DRR009891	0	E15	-6.27097	-0.875187	-2.11414	0	2	-1	0
DRR009890	0	E15	-7.2435	-0.689347	-3.03091	0	2	-1	0
DRR009889	0	E15	-5.63922	-2.07546	-1.55861	0	2	-1	0
DRR009895	1	E15	2.92232	7.13375	-0.123008	1	0	-1	2
DRR009894	1	E15	5.32989	5.10538	-1.31728	1	0	-1	2
DRR009893	1	E15	6.09204	2.2509	-0.909012	1	0	-1	2
DRR009892	1	E15	7.16753	-0.309045	-0.573133	1	1	-1	1
DRR009891	1	E15	6.52129	-2.61701	0.706888	1	1	-1	1
DRR009890	1	E15	7.55606	-3.9772	1.00165	1	1	-1	1
DRR009889	1	E15	6.01919	-4.97946	-0.339394	1	1	-1	1

## Sheet: CD1_NLW_DLW
Sample	target	E_time	PC 1	PC 2	PC 3	Dendrogram	KMeans	DBSCAN	Spectral
ERR2588564	0	E18.5	-4.33422	6.77054	-0.462232	0	0	-1	3
ERR2588563	0	E18.5	-4.54308	6.19666	0.607084	0	0	-1	3
ERR2588562	0	E18.5	-4.09583	6.66889	-0.188941	0	0	-1	3
ERR2588561	0	E18.5	-4.02207	6.46741	-0.614637	0	0	-1	3
ERR2588540	0	E17.5	-4.259	6.16748	-1.39088	0	0	-1	3
ERR2588539	0	E17.5	-4.25043	6.56976	-0.717337	0	0	-1	3
ERR2588538	0	E17.5	-3.88427	6.46449	-2.66333	0	0	-1	3
ERR2588537	0	E17.5	-3.88846	6.24459	-2.05245	0	0	-1	3
ERR2588516	0	E16.5	-4.49785	4.70537	-0.703974	0	0	-1	3
ERR2588515	0	E16.5	-4.43743	3.82723	-0.0550808	0	0	-1	3
ERR2588514	0	E16.5	-4.70758	2.83669	-0.196895	0	0	-1	3
ERR2588513	0	E16.5	-4.4261	3.87153	-0.840335	0	0	-1	3
ERR2588492	0	E15.5	-4.84707	1.60745	-1.42448	0	0	0	3
ERR2588491	0	E15.5	-4.29994	2.36265	-2.35026	0	0	-1	3
ERR2588490	0	E15.5	-4.49584	1.69532	-2.19504	0	0	0	3
ERR2588489	0	E15.5	-4.96374	2.24287	-1.66557	0	0	0	3
ERR2588468	0	E14.5	-4.86659	0.408882	0.0250471	0	2	0	1
ERR2588467	0	E14.5	-4.53758	0.386695	-0.871031	0	2	0	1
ERR2588466	0	E14.5	-5.16852	-0.244441	-2.38179	0	2	0	1
ERR2588465	0	E14.5	-5.04895	-0.0183242	-1.80877	0	2	0	1
ERR2588446	0	E13.5	-4.71811	-1.06728	-0.074976	0	2	0	1
ERR2588445	0	E13.5	-4.82773	0.564194	-0.849964	0	2	0	1
ERR2588444	0	E13.5	-4.84305	-0.496256	-0.752422	0	2	0	1
ERR2588443	0	E13.5	-4.6472	-0.488815	-0.475014	0	2	0	1
ERR2588442	0	E13.5	-4.5757	-0.494051	-0.706503	0	2	0	1
ERR2588417	0	E12.5	-4.91441	-2.24895	-0.565681	0	2	0	1
ERR2588416	0	E12.5	-4.97669	-1.79309	-0.518263	0	2	0	1
ERR2588415	0	E12.5	-4.64849	-1.96889	-0.985832	0	2	0	1
ERR2588414	0	E12.5	-4.91814	-2.14221	-0.628427	0	2	0	1
ERR2588397	0	E11.5	-4.8789	-1.02302	-0.895713	0	2	0	1
ERR2588396	0	E11.5	-2.57919	-3.11259	-2.56383	0	2	-1	1
ERR2588395	0	E11.5	-5.5382	-3.70034	-1.23927	0	2	0	1
ERR2588394	0	E11.5	-4.55239	-4.75483	-2.13279	0	2	-1	1
ERR2588393	0	E11.5	-3.83545	-3.65655	-2.0801	0	2	-1	1
ERR2588377	0	E10.5	-4.07495	-3.22496	-1.92083	0	2	0	1
ERR2588376	0	E10.5	-4.93032	-2.88937	-2.42607	0	2	0	1
ERR2588375	0	E10.5	-4.86092	-4.43078	-1.44236	0	2	-1	1
ERR2588374	0	E10.5	-4.60294	-2.74586	-0.355143	0	2	0	1
ERR2588564	1	E18.5	-0.138172	1.02717	7.34718	0	3	-1	2
ERR2588563	1	E18.5	-0.817866	0.734641	7.23652	0	3	-1	2
ERR2588562	1	E18.5	-0.258671	0.958535	7.81883	0	3	-1	2
ERR2588561	1	E18.5	0.173031	0.868288	6.54915	0	3	-1	2
ERR2588540	1	E17.5	2.47573	1.06736	5.39974	0	3	-1	2
ERR2588539	1	E17.5	1.41703	1.03849	6.24316	0	3	-1	2
ERR2588538	1	E17.5	4.77177	1.56658	2.3513	0	3	-1	0
ERR2588537	1	E17.5	2.30117	0.737826	4.27148	0	3	-1	2
ERR2588516	1	E16.5	5.58032	0.917083	3.80966	1	3	-1	0
ERR2588515	1	E16.5	4.36446	0.0140561	4.15013	1	3	-1	2
ERR2588514	1	E16.5	6.9943	0.550099	2.10657	1	1	-1	0
ERR2588513	1	E16.5	6.66382	1.01079	2.51727	1	1	-1	0
ERR2588492	1	E15.5	8.32242	0.339116	-0.175899	1	1	-1	0
ERR2588491	1	E15.5	9.55586	0.901622	-0.41537	1	1	-1	0
ERR2588490	1	E15.5	10.8739	0.569174	-1.72683	1	1	-1	0
ERR2588489	1	E15.5	9.26491	1.10728	0.0543772	1	1	-1	0
ERR2588468	1	E14.5	8.64353	-0.356331	-0.775555	1	1	-1	0
ERR2588467	1	E14.5	8.71085	-0.412956	-0.824264	1	1	-1	0
ERR2588466	1	E14.5	9.04409	-0.790468	-2.15897	1	1	-1	0
ERR2588465	1	E14.5	8.8733	-0.115919	-1.68131	1	1	-1	0
ERR2588446	1	E13.5	7.8823	-0.631605	0.0142506	1	1	-1	0
ERR2588445	1	E13.5	12.7129	0.252777	-2.47077	1	1	-1	0
ERR2588444	1	E13.5	11.7462	0.245077	-2.42797	1	1	-1	0
ERR2588443	1	E13.5	11.0264	0.00214729	-2.3214	1	1	-1	0
ERR2588442	1	E13.5	10.7908	-0.0693668	-3.12082	1	1	-1	0
ERR2588417	1	E12.5	7.62086	-1.38734	-1.43056	1	1	-1	0
ERR2588416	1	E12.5	7.42275	-1.05107	-1.14766	1	1	-1	0
ERR2588415	1	E12.5	5.27842	-1.81412	-0.863185	1	1	-1	0
ERR2588414	1	E12.5	7.1234	-1.24734	-1.04929	1	1	-1	0
ERR2588397	1	E11.5	10.9896	-0.457091	-3.66684	1	1	-1	0
ERR2588396	1	E11.5	-3.45855	-4.68195	0.900162	1	2	-1	1
ERR2588395	1	E11.5	-4.15532	-5.86867	1.63072	1	2	-1	1
ERR2588394	1	E11.5	-4.44971	-5.51456	0.660776	1	2	-1	1
ERR2588393	1	E11.5	-3.51363	-5.47661	0.666879	1	2	-1	1
ERR2588377	1	E10.5	-2.02893	-4.32503	0.455899	1	2	-1	1
ERR2588376	1	E10.5	-1.93315	-4.27557	0.35026	1	2	-1	1
ERR2588375	1	E10.5	-4.37614	-6.07197	1.91175	1	2	-1	1
ERR2588374	1	E10.5	-2.99653	-4.91823	2.37472	1	2	-1	1

## Sheet: C57BL6_NEW_DEW
Sample	target	E_time	PC 1	PC 2	PC 3	Dendrogram	KMeans	DBSCAN	Spectral
ERR4436743	0	E12.5	7.32886	-1.5339	-0.349982	0	1	0	2
ERR4436742	0	E12.5	7.22387	-1.60926	-0.318893	0	1	0	2
ERR4436741	0	E12.5	7.31441	-1.10122	-0.447684	0	1	0	2
ERR4436740	0	E12.5	7.22387	-1.60926	-0.318893	0	1	0	2
ERR4436739	0	E12.5	7.02209	-0.712013	-0.480654	0	1	0	2
ERR4436738	0	E12.5	7.02209	-0.712013	-0.480654	0	1	0	2
ERR4436737	0	E12.5	7.20381	-0.69287	-0.386281	0	1	0	2
ERR4436736	0	E12.5	7.02209	-0.712013	-0.480654	0	1	0	2
ERR4436735	0	E12.5	5.92323	-0.349399	-0.0687938	0	1	0	2
ERR4436734	0	E12.5	6.06056	-0.54016	-0.476601	0	1	0	2
ERR4436733	0	E12.5	6.06056	-0.54016	-0.476601	0	1	0	2
ERR4436732	0	E12.5	5.9882	-0.488956	-0.656293	0	1	0	2
ERR4436731	0	E12.5	8.32067	0.557376	-0.475813	0	1	0	2
ERR4436730	0	E12.5	8.69756	0.842296	-1.01661	0	1	-1	2
ERR4436729	0	E12.5	8.67292	0.682194	-0.9982	0	1	0	2
ERR4436728	0	E12.5	8.89409	0.704136	-0.917779	0	1	-1	2
ERR4436727	0	E12.5	5.59843	-1.87669	0.0433325	0	2	0	3
ERR4436726	0	E12.5	5.70085	-1.50418	0.642701	0	2	0	3
ERR4436725	0	E12.5	5.67039	-2.02033	0.13437	0	2	0	3
ERR4436724	0	E12.5	5.42052	-1.41403	0.757344	0	2	0	3
ERR4436723	0	E12.5	6.95687	-1.15071	-1.06011	0	1	0	2
ERR4436722	0	E12.5	7.25052	-0.723669	-1.08239	0	1	0	2
ERR4436721	0	E12.5	6.85076	-1.22687	-1.02868	0	1	0	2
ERR4436720	0	E12.5	7.35663	-0.647511	-1.11381	0	1	0	2
ERR4436719	0	E11.5	3.4655	-3.34523	2.09758	0	2	1	3
ERR4436718	0	E11.5	3.66506	-3.48853	2.19016	0	2	1	3
ERR4436717	0	E11.5	3.4655	-3.34523	2.09758	0	2	1	3
ERR4436716	0	E11.5	3.76803	-3.79394	1.70203	0	2	1	3
ERR4436715	0	E11.5	5.82846	-2.93821	-2.44285	0	2	-1	3
ERR4436714	0	E11.5	5.94507	-2.91541	-2.36047	0	2	-1	3
ERR4436713	0	E11.5	5.94507	-2.91541	-2.36047	0	2	-1	3
ERR4436712	0	E11.5	5.94507	-2.91541	-2.36047	0	2	-1	3
ERR4436711	0	E11.5	3.1073	-3.65851	2.32624	0	2	1	3
ERR4436710	0	E11.5	3.44382	-3.4748	2.14607	0	2	1	3
ERR4436709	0	E11.5	3.41401	-3.9127	1.61513	0	2	1	3
ERR4436708	0	E11.5	3.29536	-3.52353	2.27054	0	2	1	3
ERR4436707	0	E11.5	5.54143	-3.22221	-1.54401	0	2	-1	3
ERR4436706	0	E11.5	5.44443	-2.69072	-2.08034	0	2	-1	3
ERR4436705	0	E11.5	5.00166	-3.39224	-1.78767	0	2	-1	3
ERR4436704	0	E11.5	5.88417	-3.09476	-1.72022	0	2	-1	3
ERR4436703	0	E11.5	2.89453	-2.66501	1.27921	0	2	1	3
ERR4436702	0	E11.5	3.01028	-3.62158	2.15499	0	2	1	3
ERR4436701	0	E11.5	2.92015	-2.99264	1.93901	0	2	1	3
ERR4436700	0	E11.5	3.17194	-3.23796	1.13104	0	2	1	3
ERR4436699	0	E11.5	2.85681	-3.42625	-1.20504	0	2	-1	3
ERR4436698	0	E11.5	2.96531	-3.75173	-1.71012	0	2	-1	3
ERR4436697	0	E11.5	2.85681	-3.42625	-1.20504	0	2	-1	3
ERR4436696	0	E11.5	2.96531	-3.75173	-1.71012	0	2	-1	3
SRR2039772	0	E18	11.6498	8.63894	4.18484	0	1	-1	2
SRR2039771	0	E18	11.6498	8.63894	4.18484	0	1	-1	2
SRR2039770	0	E15.5	9.81137	7.44397	3.09531	0	1	-1	2
SRR2039769	0	E15.5	11.9573	9.65916	5.01705	0	1	-1	2
SRR7990531	0	E10.5	-1.58482	-3.69759	-2.36102	0	0	-1	0
SRR7990532	0	E10.5	-1.52492	-3.59288	-2.68428	0	0	-1	0
SRR7990533	0	E10.5	-2.47849	-3.61634	-2.98623	0	0	-1	0
SRR7990534	0	E14.5	-3.02697	-3.56997	3.51326	0	3	-1	0
SRR7990535	0	E14.5	-2.95641	-3.65133	0.541782	0	0	-1	0
SRR7990536	0	E14.5	-3.59808	-3.8553	2.68636	0	3	-1	0
SRR7990537	0	E16.5	-4.00517	-3.26078	7.2252	0	3	-1	0
SRR7990538	0	E16.5	-5.02473	-3.7849	9.85461	0	3	-1	0
SRR7990539	0	E16.5	-4.326	-4.1652	9.08478	0	3	-1	0
SRR16148381	0	E14.5	4.69805	3.31521	0.448522	0	1	-1	2
SRR16148382	0	E14.5	7.48844	5.18617	1.56712	0	1	-1	2
SRR16148383	0	E14.5	5.93964	4.17655	0.631811	0	1	-1	2
ERR4436743	1	E12.5	-3.42529	3.42459	-0.54502	0	0	2	1
ERR4436742	1	E12.5	-3.47755	3.38848	-0.248955	0	0	2	1
ERR4436741	1	E12.5	-3.45497	3.83104	-1.32992	0	0	2	1
ERR4436740	1	E12.5	-3.64	3.34082	-0.125691	0	0	2	1
ERR4436739	1	E12.5	-3.29131	2.4709	-1.33513	0	0	2	1
ERR4436738	1	E12.5	-3.29131	2.4709	-1.33513	1	0	2	1
ERR4436737	1	E12.5	-3.66352	2.45217	-0.926297	1	0	2	1
ERR4436736	1	E12.5	-3.29131	2.4709	-1.33513	1	0	2	1
ERR4436735	1	E12.5	-3.10832	3.27648	-1.19639	1	0	2	1
ERR4436734	1	E12.5	-2.55184	3.4965	-2.14633	1	0	2	1
ERR4436733	1	E12.5	-2.55184	3.4965	-2.14633	1	0	2	1
ERR4436732	1	E12.5	-3.10832	3.27648	-1.19639	1	0	2	1
ERR4436731	1	E12.5	-1.97093	3.32119	-1.55924	1	0	2	1
ERR4436730	1	E12.5	-1.80282	3.44185	-1.60902	1	0	2	1
ERR4436729	1	E12.5	-1.74054	3.24365	-1.51788	1	0	2	1
ERR4436728	1	E12.5	-1.97093	3.32119	-1.55924	1	0	2	1
ERR4436727	1	E12.5	-3.0771	2.34963	-0.939902	1	0	2	1
ERR4436726	1	E12.5	-3.43544	2.16314	-0.649544	1	0	2	1
ERR4436725	1	E12.5	-3.54321	2.41042	-0.365612	1	0	2	1
ERR4436724	1	E12.5	-3.22047	2.53627	-0.541266	1	0	2	1
ERR4436723	1	E12.5	-3.90038	1.8463	-0.600158	1	0	2	1
ERR4436722	1	E12.5	-3.90038	1.8463	-0.600158	1	0	2	1
ERR4436721	1	E12.5	-3.90038	1.8463	-0.600158	1	0	2	1
ERR4436720	1	E12.5	-3.90038	1.8463	-0.600158	1	0	2	1
ERR4436719	1	E11.5	-7.964	0.48448	0.143927	1	0	3	0
ERR4436718	1	E11.5	-7.59832	0.665823	0.198432	1	0	3	0
ERR4436717	1	E11.5	-7.65389	0.625939	0.214888	1	0	3	0
ERR4436716	1	E11.5	-7.65389	0.625939	0.214888	1	0	3	0
ERR4436715	1	E11.5	-8.5632	0.271413	0.811391	1	0	3	0
ERR4436714	1	E11.5	-8.83571	0.244376	0.712301	1	0	3	0
ERR4436713	1	E11.5	-8.83571	0.244376	0.712301	1	0	3	0
ERR4436712	1	E11.5	-8.73478	0.720321	0.950314	1	0	3	0
ERR4436711	1	E11.5	-7.35017	0.697376	0.0885771	1	0	3	0
ERR4436710	1	E11.5	-7.35017	0.697376	0.0885771	1	0	3	0
ERR4436709	1	E11.5	-7.35017	0.697376	0.0885771	1	0	3	0
ERR4436708	1	E11.5	-7.0897	0.81006	0.350274	1	0	3	0
ERR4436707	1	E11.5	-7.88761	1.25024	0.783308	1	0	3	0
ERR4436706	1	E11.5	-7.88761	1.25024	0.783308	1	0	3	0
ERR4436705	1	E11.5	-7.88761	1.25024	0.783308	1	0	3	0
ERR4436704	1	E11.5	-7.88761	1.25024	0.783308	1	0	3	0
ERR4436703	1	E11.5	-7.87055	0.846787	0.483986	1	0	3	0
ERR4436702	1	E11.5	-8.00445	0.829266	0.40859	1	0	3	0
ERR4436701	1	E11.5	-7.87055	0.846787	0.483986	1	0	3	0
ERR4436700	1	E11.5	-7.87055	0.846787	0.483986	1	0	3	0
ERR4436699	1	E11.5	-8.68496	0.397865	0.734417	1	0	3	0
ERR4436698	1	E11.5	-8.85575	0.379873	0.64572	1	0	3	0
ERR4436697	1	E11.5	-8.84863	0.333151	1.01381	1	0	3	0
ERR4436696	1	E11.5	-8.68496	0.397865	0.734417	1	0	3	0
SRR2039772	1	E18	5.52143	4.25656	-0.743611	1	1	-1	2
SRR2039771	1	E18	5.5409	4.17956	-0.71088	1	1	-1	2
SRR2039770	1	E15.5	3.3524	3.16035	-0.972695	1	1	-1	2
SRR2039769	1	E15.5	6.7423	4.54251	0.120316	1	1	-1	2
SRR7990531	1	E10.5	-5.65298	-2.29361	-3.44089	1	0	-1	0
SRR7990532	1	E10.5	-5.85176	-2.18074	-3.56823	1	0	-1	0
SRR7990533	1	E10.5	-6.72603	-2.09405	-3.01657	1	0	-1	0
SRR7990534	1	E14.5	-5.35229	-2.13845	-1.64953	1	0	-1	0
SRR7990535	1	E14.5	-6.10983	-1.96258	-2.55327	1	0	-1	0
SRR7990536	1	E14.5	-5.36676	-2.01125	-1.56296	1	0	-1	0
SRR7990537	1	E16.5	-4.36461	-2.01683	0.614185	1	0	-1	0
SRR7990538	1	E16.5	-4.5913	-2.73411	1.97221	1	0	-1	0
SRR7990539	1	E16.5	-4.35043	-2.23676	1.13906	1	0	-1	0
SRR16148381	1	E14.5	-2.28624	0.638441	-2.31206	1	0	-1	1
SRR16148382	1	E14.5	1.01494	1.69203	-1.83029	1	2	-1	2
SRR16148383	1	E14.5	-1.33446	0.980975	-2.58141	1	0	-1	1

## Sheet: C57BL6J_NEW_DEW
Samples	target	E_time	PC 1	PC 2	PC 3	PC 4	Dendrogram	KMeans	DBSCAN	Spectral
DRR009832	0	E17	-0.0968329	10.1281	7.06261	-0.609245	0	4	-1	2
DRR009831	0	E15	5.47539	-0.0325627	5.42082	-0.262051	0	2	-1	3
DRR009830	0	E14	6.50596	-1.21669	4.08339	-0.0854898	0	2	-1	3
DRR009829	0	E12	-0.0545738	-0.82836	-2.08891	0.380475	0	1	-1	0
SRR3407348	0	E13.5	4.81402	1.67697	-4.44246	-2.49964	0	3	-1	1
SRR3407350	0	E15.5	6.98023	-2.63508	-0.610881	3.26588	0	2	-1	3
SRR3407352	0	E18.5	2.70571	2.6951	-3.35019	-1.10589	0	3	-1	1
SRR3407349	0	E13.5	5.06935	1.4429	-4.2879	-2.95371	0	3	-1	1
SRR3407351	0	E15.5	8.22563	-2.31013	0.604587	2.41377	0	2	-1	3
SRR3407353	0	E18.5	1.80597	1.91749	-3.83365	-0.699311	0	3	-1	1
DRR009832	1	E17	-4.62633	5.49214	-0.28528	1.87428	0	4	-1	2
DRR009831	1	E15	-2.84221	0.0864995	-1.47068	1.35415	1	1	-1	0
DRR009830	1	E14	-2.53755	-1.73083	-1.80326	1.14607	1	1	-1	0
DRR009829	1	E12	-7.10192	3.18411	-4.25123	2.9853	1	4	-1	0
SRR3407348	1	E13.5	-5.3018	-0.282775	2.20159	-0.645676	1	0	-1	4
SRR3407350	1	E15.5	-3.67354	-2.91688	1.73916	1.58457	1	0	-1	4
SRR3407352	1	E18.5	-4.29454	-2.78814	0.234455	-1.94774	1	0	-1	4
SRR3407349	1	E13.5	-5.44559	-2.63397	1.86579	-2.293	1	0	-1	4
SRR3407351	1	E15.5	-1.71264	-4.76229	1.92264	0.608756	1	0	-1	4
SRR3407353	1	E18.5	-3.89474	-4.48564	1.28941	-2.5115	1	0	-1	4

## Sheet: C57BL6N_NEW_DEW
Sample	target	E_time	PC 1	PC 2	Dendrogram	KMeans	DBSCAN	Spectral
SRR7796794	0	E10.5	8.10706	1.3846	0	2	-1	1
SRR7796795	0	E10.5	8.11952	-0.165803	0	2	-1	1
SRR7796796	0	E10.5	7.87458	2.05287	0	2	-1	1
SRR7796797	0	E12.5	1.4585	-2.47233	0	1	-1	3
SRR7796798	0	E12.5	-1.46573	-3.22075	0	1	-1	3
SRR7796799	0	E12.5	-0.874813	-3.19168	0	1	-1	3
SRR7796800	0	E14.5	-6.65836	-3.38989	0	0	-1	0
SRR7796801	0	E14.5	-8.02706	-2.58124	0	0	-1	0
SRR7796802	0	E14.5	-7.90788	-2.40558	0	0	-1	0
SRR7796803	0	E16.5	-9.20473	-0.996228	1	0	-1	0
SRR7796804	0	E16.5	-9.3225	-0.90587	1	0	-1	0
SRR7796805	0	E16.5	-9.40184	-0.683274	1	0	-1	0
SRR7796794	1	E10.5	10.3924	-1.32477	1	2	-1	1
SRR7796795	1	E10.5	10.3921	-1.78321	1	2	-1	1
SRR7796796	1	E10.5	10.4831	-1.28792	1	2	-1	1
SRR7796797	1	E12.5	6.76003	-0.211436	1	2	-1	1
SRR7796798	1	E12.5	3.9275	0.30825	1	2	-1	1
SRR7796799	1	E12.5	4.52722	0.350106	1	2	-1	1
SRR7796800	1	E14.5	-1.11026	2.0999	1	3	-1	2
SRR7796801	1	E14.5	-2.23797	2.97553	1	3	-1	2
SRR7796802	1	E14.5	-2.34782	3.4193	1	3	-1	2
SRR7796803	1	E16.5	-3.92121	3.4676	1	3	-1	2
SRR7796804	1	E16.5	-4.28402	3.9585	1	3	-1	2
SRR7796805	1	E16.5	-5.27793	4.60334	1	3	-1	2

## Sheet: C57BL6_NHW_DHW
Sample	target	E_time	PC 1	PC 2	Dendrogram	KMeans	DBSCAN	Spectral
SRR15354393	0	E10.5	11.7633	1.60933	0	3	-1	2
SRR15354391	0	E10.5	10.0191	1.88241	0	3	-1	2
SRR15354392	0	E10.5	9.44776	1.43762	0	3	-1	2
SRR15354392	1	E10.5	5.86746	-2.90735	1	0	-1	3
SRR15354391	1	E10.5	5.55556	-3.28919	1	0	-1	3
SRR392606	0	E14.5	5.45986	4.57254	0	3	-1	2
SRR496261	0	E14.5	5.45986	4.57254	0	3	-1	2
SRR15354393	1	E10.5	5.4512	-3.16757	1	0	-1	3
SRR496261	1	E14.5	1.42733	-1.97325	1	0	-1	3
SRR392606	1	E14.5	1.42733	-1.97325	1	0	-1	3
SRR23035204	1	E9.5	-3.87977	-3.66168	1	1	-1	0
SRR17731608	1	E12.5	-3.90452	-3.31825	1	1	-1	0
SRR17731610	1	E12.5	-3.90452	-3.31825	1	1	-1	0
SRR17731609	1	E12.5	-3.92754	-2.65784	1	1	-1	0
SRR23035205	1	E9.5	-4.00345	-4.15598	1	1	-1	0
SRR23035206	1	E9.5	-4.01027	-3.64741	1	1	-1	0
SRR17731609	0	E12.5	-5.43959	5.71397	0	2	-1	1
SRR23035206	0	E9.5	-6.23277	1.18637	1	2	-1	1
SRR17731610	0	E12.5	-6.34542	5.51858	0	2	-1	1
SRR23035205	0	E9.5	-6.50404	0.73023	0	2	-1	1
SRR17731608	0	E12.5	-6.76629	5.16329	0	2	-1	1
SRR23035204	0	E9.5	-6.9606	1.68314	0	2	-1	1

## Sheet: C57BL6J_NHW_DHW
Sample	target	E_time	PC 1	PC 2	PC 3	Dendrogram	KMeans	DBSCAN	Spectral
DRR009852	0	E18	-2.29163	-1.38066	0.923066	0	2	-1	0
DRR009851	0	E17	-6.8396	-0.545387	-1.56681	0	0	-1	0
DRR009850	0	E16	-6.19818	-2.13247	-1.0076	0	2	-1	0
DRR009849	0	E15	-5.13507	-0.725193	-0.24993	0	2	-1	0
DRR009848	0	E14	-3.17287	-1.25029	0.167291	0	2	-1	0
DRR009847	0	E13	-5.21396	-0.483421	-0.524323	0	2	-1	0
DRR009846	0	E12	-4.10757	-0.475073	-0.414293	0	2	-1	0
DRR009845	0	E11	-0.723091	-0.670492	-0.0957569	0	2	-1	0
SRR1691395	0	E9.5	-3.74357	-1.62483	-1.53086	1	2	-1	0
SRR1691394	0	E9.5	-5.42028	-1.51128	-1.16157	1	2	-1	0
SRR1691393	0	E9.5	-4.19918	-1.68262	-1.28048	1	2	-1	0
SRR1391039	0	E13.5	-0.316548	-3.60041	1.99819	1	2	-1	3
SRR1391038	0	E13.5	-1.80309	-4.17755	2.62351	1	2	-1	3
SRR1391037	0	E13.5	-1.23396	-3.85033	2.44223	1	2	-1	3
SRR1391036	0	E13.5	-1.30543	-3.38111	2.09709	1	2	-1	3
SRR1391035	0	E13.5	-2.26583	-4.8278	3.63326	1	2	-1	3
SRR1391034	0	E13.5	0.393994	-3.36198	1.71882	1	2	-1	3
SRR1391033	0	E13.5	-0.685748	-3.60524	1.8947	1	2	-1	3
SRR14118948	0	E13.5	-11.7198	-4.56717	1.96926	1	0	-1	0
SRR14118949	0	E13.5	-5.62303	-4.76429	0.655838	1	2	-1	0
SRR14118950	0	E13.5	-8.90805	-4.90079	1.32119	1	2	-1	0
SRR15598832	0	E9.5	10.9136	-2.94928	-1.78694	1	1	-1	1
SRR15598833	0	E9.5	11.4321	-2.91535	-2.39005	1	1	-1	1
SRR15598834	0	E9.5	11.0443	-2.77004	-3.53469	1	1	-1	1
SRR15598835	0	E9.5	8.74337	-2.58899	0.655544	1	1	-1	1
SRR15598836	0	E9.5	10.1656	-3.17266	-0.313313	1	1	-1	1
SRR15598837	0	E9.5	13.868	-3.4383	-2.41882	1	1	-1	1
SRR15598838	0	E9.5	9.24476	-3.66196	-1.75252	2	1	-1	1
SRR15598839	0	E9.5	10.8082	-3.17757	-0.650666	2	1	-1	1
DRR009852	1	E18	4.62662	0.532955	0.386793	2	3	-1	1
DRR009851	1	E17	-0.613534	0.775603	0.295575	2	2	-1	2
DRR009850	1	E16	-0.0174338	1.00963	-0.171394	2	3	-1	2
DRR009849	1	E15	2.24752	0.497054	-0.283987	2	3	-1	1
DRR009848	1	E14	4.46608	0.408828	-0.530787	2	3	-1	1
DRR009847	1	E13	1.52779	1.22442	0.255976	2	3	-1	1
DRR009846	1	E12	3.74516	-0.177935	-0.722043	2	3	-1	1
DRR009845	1	E11	5.56732	1.97896	0.783712	2	3	-1	1
SRR1691395	1	E9.5	-8.32029	3.398	-2.94036	2	0	-1	0
SRR1691394	1	E9.5	-8.14817	3.16568	-2.5505	2	0	-1	0
SRR1691393	1	E9.5	-6.89359	3.21228	-2.71987	2	0	-1	0
SRR1391039	1	E13.5	-0.647697	1.80636	0.146469	2	3	-1	2
SRR1391038	1	E13.5	-1.92921	1.01642	0.111895	2	2	-1	2
SRR1391037	1	E13.5	-1.6944	1.12343	0.127921	2	2	-1	2
SRR1391036	1	E13.5	-0.754766	1.86552	-0.075996	2	3	-1	2
SRR1391035	1	E13.5	-1.79167	0.883881	0.774975	2	2	-1	2
SRR1391034	1	E13.5	0.0525376	1.79188	0.210728	2	3	-1	2
SRR1391033	1	E13.5	-0.647697	1.80636	0.146469	2	3	-1	2
SRR14118948	1	E13.5	-10.4332	0.830336	-2.3046	2	0	-1	0
SRR14118949	1	E13.5	-6.67965	2.11548	-1.71887	2	0	-1	0
SRR14118950	1	E13.5	-8.29605	1.70433	-2.4257	2	0	-1	0
SRR15598832	1	E9.5	3.25032	5.74312	1.43765	2	3	-1	2
SRR15598833	1	E9.5	3.9922	6.46389	1.53345	2	3	-1	2
SRR15598834	1	E9.5	4.02851	6.80376	1.55314	2	3	-1	2
SRR15598835	1	E9.5	0.8656	6.12809	1.59259	2	3	-1	2
SRR15598836	1	E9.5	2.95067	6.24082	1.47771	2	3	-1	2
SRR15598837	1	E9.5	7.45317	4.22734	1.59196	2	3	-1	1
SRR15598838	1	E9.5	1.6873	5.87751	1.36676	2	3	-1	2
SRR15598839	1	E9.5	4.69919	5.73851	1.22899	2	3	-1	2

## Sheet: CD1_NHW_DHW
Samples	target	E_time	PC 1	PC 2	PC 3	PC 4	PC 5	Dendrogram	KMeans	DBSCAN	Spectral
ERR2588552	0	E12.5	3.4886	-5.04999	-0.238381	-4.05903	0.821074	0	2	-1	0
ERR2588551	0	E12.5	-0.802831	-3.36196	0.0305661	-4.12376	2.52506	0	2	-1	0
ERR2588550	0	E12.5	2.73899	-4.79116	-0.0537164	-2.89883	0.297979	0	2	-1	0
ERR2588549	0	E12.5	3.07032	-3.83216	-0.575888	-2.79249	0.523416	0	2	-1	0
ERR2588528	0	E12.5	-2.03968	-5.71195	2.6431	-2.99297	0.207725	0	2	-1	0
ERR2588527	0	E17.5	2.18159	-3.83345	-1.73676	-3.44605	2.20854	0	2	-1	0
ERR2588526	0	E17.5	1.85827	-4.13389	0.101826	-2.95105	2.05064	0	2	-1	0
ERR2588525	0	E17.5	8.96587	-5.18684	-0.123949	-1.89965	-2.5398	0	1	-1	2
ERR2588504	0	E16.5	-0.294148	-5.10051	1.07827	-2.9498	0.231517	0	2	-1	0
ERR2588503	0	E16.5	-1.28084	-2.85653	1.27418	-1.68392	2.05027	0	2	-1	0
ERR2588502	0	E16.5	-1.95329	-5.00507	3.76412	-1.07514	-0.900016	0	2	-1	0
ERR2588501	0	E16.5	-0.772116	-4.17761	2.24557	1.25939	0.356346	0	2	-1	0
ERR2588480	0	E15.5	-2.17054	-4.34349	3.67087	3.57167	-0.705739	0	2	-1	0
ERR2588479	0	E15.5	0.639582	-3.55696	2.40583	-0.893094	-0.903648	0	2	-1	0
ERR2588478	0	E15.5	-2.69699	-4.86596	3.01946	-0.887376	0.255891	0	2	-1	0
ERR2588477	0	E15.5	-4.2957	-5.37981	4.9727	3.05102	-0.481222	0	2	-1	0
ERR2588457	0	E14.5	0.193781	-4.95949	2.91736	1.13748	-1.90341	0	2	-1	0
ERR2588456	0	E14.5	0.194234	-2.93203	1.07071	-0.330978	-0.443134	0	2	-1	0
ERR2588455	0	E14.5	0.734896	-3.96019	3.06246	0.171911	-0.363158	0	2	-1	0
ERR2588433	0	E13.5	-1.52003	-4.78165	3.25904	1.4921	-0.951733	0	2	-1	0
ERR2588432	0	E13.5	-0.888587	-4.45797	2.29171	0.283331	-0.475038	0	2	-1	0
ERR2588431	0	E13.5	3.11334	-4.53627	1.92603	-1.13015	-0.787871	0	2	-1	0
ERR2588430	0	E13.5	1.43166	-4.11927	0.674563	1.21255	-1.41426	0	2	-1	0
ERR2588409	0	E12.5	-3.06336	-4.6561	2.5314	-0.532026	0.61586	1	2	-1	0
ERR2588408	0	E12.5	-2.00546	-1.82689	-0.0994465	1.66063	2.36788	1	2	-1	1
ERR2588407	0	E12.5	3.0003	-2.87114	-1.30219	2.0164	-0.0980871	1	1	-1	2
ERR2588406	0	E12.5	6.04872	-2.64974	-2.56258	1.93729	-0.393778	1	1	-1	2
ERR2588388	0	E11.5	-1.44198	-0.272545	-1.56689	2.26284	2.71731	1	3	-1	2
ERR2588387	0	E11.5	4.26594	1.86624	-5.24494	1.17355	2.71113	1	1	-1	2
ERR2588386	0	E11.5	6.87862	-0.449491	-2.46531	2.64039	-1.09108	1	1	-1	2
ERR2588385	0	E11.5	-1.63077	-0.883638	-1.58565	2.38301	3.47259	1	3	-1	2
ERR2588373	0	E10.5	3.73575	0.202633	-3.61427	3.07381	2.80558	1	1	-1	2
ERR2588372	0	E10.5	9.68301	0.460708	-6.41471	1.02836	2.13442	1	1	-1	2
ERR2588371	0	E10.5	2.1468	-0.396029	-1.78383	3.78989	3.74144	1	1	-1	2
ERR2588370	0	E10.5	10.3104	-1.01781	-5.75766	2.39337	0.474229	1	1	-1	2
ERR1795291	0	E10.5	1.11017	-2.0765	-0.238547	8.4334	-1.7439	1	1	-1	2
ERR1795290	0	E11.5	1.62438	-2.16529	-0.0767625	8.6639	-2.07279	1	1	-1	2
ERR2588552	1	E12.5	0.279473	2.24637	-2.99295	-1.55632	-2.12693	2	3	-1	3
ERR2588551	1	E12.5	-0.744407	2.77415	-2.23915	-2.42905	-0.751225	2	3	-1	3
ERR2588550	1	E12.5	0.595906	2.23082	-1.54196	-1.51579	-2.27297	3	3	-1	3
ERR2588549	1	E12.5	0.957863	1.72771	-2.78699	-1.37707	-1.98858	3	3	-1	3
ERR2588528	1	E12.5	-2.33979	1.59752	-0.87933	-2.05231	-0.769008	3	3	-1	3
ERR2588527	1	E17.5	1.26497	1.90746	-3.03052	-1.58071	-0.842989	3	3	-1	3
ERR2588526	1	E17.5	1.22766	2.12395	-3.08313	-1.81414	-0.526363	3	3	-1	3
ERR2588525	1	E17.5	0.787791	1.05391	-0.446056	0.497421	-1.33426	3	3	-1	2
ERR2588504	1	E16.5	-0.500134	2.82114	-1.79146	-2.30567	-0.180385	3	3	-1	3
ERR2588503	1	E16.5	0.428681	2.26521	-2.14378	-1.61382	-1.08085	3	3	-1	3
ERR2588502	1	E16.5	-2.66857	1.3839	-0.235071	-1.75937	-0.671955	3	3	-1	1
ERR2588501	1	E16.5	-5.04631	1.60415	-0.388604	0.492001	0.696735	3	3	-1	1
ERR2588480	1	E15.5	-6.28802	1.51706	0.858572	0.248781	0.614487	3	3	-1	1
ERR2588479	1	E15.5	0.853274	2.55337	-2.19661	-1.69005	-0.146083	3	3	-1	3
ERR2588478	1	E15.5	-4.1268	1.76283	0.212674	-1.38975	-0.283189	3	3	-1	1
ERR2588477	1	E15.5	-7.9618	2.19387	2.0776	1.17072	0.334274	3	3	-1	1
ERR2588457	1	E14.5	-2.37229	2.40193	-1.02298	-1.10731	-0.334286	3	3	-1	1
ERR2588456	1	E14.5	-1.89351	2.79485	-1.34235	-1.62243	0.305313	3	3	-1	3
ERR2588455	1	E14.5	1.59824	1.94328	-1.78315	-0.361459	-3.13347	3	3	-1	3
ERR2588433	1	E13.5	-6.18441	1.23096	0.563941	0.247616	0.370064	3	3	-1	1
ERR2588432	1	E13.5	-1.80148	3.42041	-1.23827	-1.84147	-0.280399	3	3	-1	3
ERR2588431	1	E13.5	1.84102	2.61113	-1.51345	-0.274531	-2.51759	3	3	-1	3
ERR2588430	1	E13.5	-3.44705	1.6112	-1.91366	0.23819	-0.453902	3	3	-1	1
ERR2588409	1	E12.5	-5.24887	1.73671	0.890949	-1.06417	-0.246478	3	3	-1	1
ERR2588408	1	E12.5	-3.77015	3.11374	-0.904518	-0.508785	0.927376	3	3	-1	1
ERR2588407	1	E12.5	-2.45981	3.09912	-1.3638	-0.841337	0.243522	3	3	-1	1
ERR2588406	1	E12.5	0.591078	4.50271	-3.11233	0.212178	-1.00809	3	3	-1	3
ERR2588388	1	E11.5	-3.02615	5.19557	-0.28107	-0.3128	-0.910118	3	3	-1	1
ERR2588387	1	E11.5	-7.11062	5.03312	2.50228	0.697675	2.11765	3	3	-1	1
ERR2588386	1	E11.5	-4.11154	4.09422	0.616918	0.117004	-0.386466	3	3	-1	1
ERR2588385	1	E11.5	-2.89512	4.80308	-0.799282	-0.934198	-0.177775	3	3	-1	1
ERR2588373	1	E10.5	2.04508	6.43279	2.99624	0.343527	-0.784884	3	3	-1	3
ERR2588372	1	E10.5	8.58963	9.27181	10.1179	-0.309442	1.61302	3	0	-1	2
ERR2588371	1	E10.5	-0.636513	4.30441	-1.68692	-0.229548	-1.2385	3	3	-1	3
ERR2588370	1	E10.5	15.3471	11.5424	13.1443	-0.131716	1.09184	3	0	-1	2
ERR1795291	1	E10.5	-6.16664	3.38147	-0.381114	3.68408	0.416124	3	3	-1	1
ERR1795290	1	E11.5	-6.16664	3.38147	-0.381114	3.68408	0.416124	3	3	-1	1
