# Supplementary material for: Uncovering codon usage patterns during murine embryogenesis and tissue-specific developmental diseases
Source: Front Genet. 2025 May 26;16:1554773. doi: 10.3389/fgene.2025.1554773 (PMC12146342; doi:10.3389/fgene.2025.1554773)
Supplement: Supplementary file 6 [file Table4.xlsx]

## Sheet: C57BL6_NLW_DLW
Quad	Codon	PC1	PC2	AA	T	C	A	G		Table Legend:
PC1_pos-PC2_pos-	GCT	0.149787	0.0713129	Ala	1	1	0	1		Comparisons are shown as their acronym. For examle, healthy (normal) liver weighted samples are labelled as ‘NLW’ and diseased liver weighted samples are labelled as ‘DLW’.
PC1_neg-PC2_pos-	GCA	-0.152987	0.0437769	Ala	0	1	1	1		Quad' lists the location in space of each codon.
PC1_neg-PC2_neg-	GCG	-0.147322	-0.0607303	Ala	0	1	0	2		Codon' is the codon of interest.
PC1_pos-PC2_neg-	GCC	0.143073	-0.111723	Ala	0	2	0	1		PC1' is the first principal component loading value for each codon.
PC1_neg-PC2_pos-	AGA	-0.0834641	0.241791	Arg	0	0	2	1		PC2' is the second principal component loading values for each codon.
PC1_pos-PC2_pos-	AGG	0.126344	0.0394753	Arg	0	0	1	2		AA' is the assocated amino acid.
PC1_pos-PC2_neg-	CGT	0.139082	-0.00875253	Arg	1	1	0	1		T', 'C', 'A', 'G' are nucleotide counts of the codon of interest.
PC1_neg-PC2_neg-	CGA	-0.144156	-0.0533583	Arg	0	1	1	1
PC1_neg-PC2_neg-	CGG	-0.114485	-0.110927	Arg	0	1	0	2
PC1_neg-PC2_neg-	CGC	-0.115189	-0.177006	Arg	0	2	0	1
PC1_pos-PC2_pos-	AAT	0.0900906	0.230606	Asn	1	0	2	0			C57BL/6N
PC1_neg-PC2_neg-	AAC	-0.0900906	-0.230606	Asn	0	1	2	0			CD-1
PC1_pos-PC2_pos-	GAT	0.147912	0.0925758	Asp	1	0	1	1			C57BL/6J
PC1_neg-PC2_neg-	GAC	-0.147912	-0.0925758	Asp	0	1	1	1			C57BL/6
PC1_neg-PC2_pos-	TGT	-0.077364	0.198678	Cys	2	0	0	1
PC1_pos-PC2_neg-	TGC	0.077364	-0.198678	Cys	1	1	0	1
PC1_neg-PC2_pos-	CAA	-0.129898	0.05314	Gln	0	1	2	0		Table S4: Quadrant Specific Codon Loading Values and Nucleotide Distribution for Healthy vs Diseased Weighted Samples.
PC1_pos-PC2_neg-	CAG	0.129898	-0.05314	Gln	0	1	1	1
PC1_pos-PC2_pos-	GAA	0.120848	0.10049	Glu	0	0	2	1
PC1_neg-PC2_neg-	GAG	-0.120848	-0.10049	Glu	0	0	1	2
PC1_neg-PC2_pos-	GGA	-0.138904	0.131354	Gly	0	0	1	2
PC1_pos-PC2_pos-	GGT	0.152066	0.0100232	Gly	1	0	0	2
PC1_pos-PC2_neg-	GGC	0.141219	-0.0317196	Gly	0	1	0	2
PC1_neg-PC2_neg-	GGG	-0.146577	-0.0805508	Gly	0	0	0	3
PC1_neg-PC2_pos-	CAT	-0.149334	0.0493768	His	1	1	1	0
PC1_pos-PC2_neg-	CAC	0.149334	-0.0493768	His	0	2	1	0
PC1_pos-PC2_pos-	ATT	0.00077846	0.26224	Ile	2	0	1	0
PC1_pos-PC2_pos-	ATA	0.0962681	0.228687	Ile	1	0	2	0
PC1_neg-PC2_neg-	ATC	-0.0649653	-0.284715	Ile	1	1	1	0
PC1_neg-PC2_pos-	TTA	-0.127806	0.154267	Leu	2	0	1	0
PC1_neg-PC2_pos-	TTG	-0.141947	0.107068	Leu	2	0	0	1
PC1_neg-PC2_pos-	CTA	-0.112522	0.0919438	Leu	1	1	1	0
PC1_neg-PC2_pos-	CTT	-0.152952	0.0278273	Leu	2	1	0	0
PC1_pos-PC2_neg-	CTG	0.151319	-0.0499009	Leu	1	1	0	1
PC1_neg-PC2_neg-	CTC	-0.0827039	-0.163517	Leu	1	2	0	0
PC1_neg-PC2_pos-	AAA	-0.150671	0.043582	Lys	0	0	3	0
PC1_pos-PC2_neg-	AAG	0.150671	-0.043582	Lys	0	0	2	1
PC1_pos-PC2_pos-	TTT	0.0972928	0.244022	Phe	3	0	0	0
PC1_neg-PC2_neg-	TTC	-0.0972928	-0.244022	Phe	2	1	0	0
PC1_pos-PC2_pos-	CCT	0.127673	0.112701	Pro	1	2	0	0
PC1_neg-PC2_pos-	CCA	-0.142299	0.0816498	Pro	0	2	1	0
PC1_neg-PC2_neg-	CCG	-0.148114	-0.0475731	Pro	0	2	0	1
PC1_pos-PC2_neg-	CCC	0.144655	-0.0809499	Pro	0	3	0	0
PC1_neg-PC2_pos-	AGT	-0.141995	0.0797759	Ser	1	0	1	1
PC1_neg-PC2_pos-	TCA	-0.152966	0.0401759	Ser	1	1	1	0
PC1_pos-PC2_pos-	TCT	0.152839	0.0396667	Ser	2	1	0	0
PC1_pos-PC2_neg-	AGC	0.151969	-0.0330477	Ser	0	1	1	1
PC1_neg-PC2_neg-	TCC	-0.148378	-0.0631467	Ser	1	2	0	0
PC1_neg-PC2_neg-	TCG	-0.143088	-0.0680273	Ser	1	1	0	1
PC1_neg-PC2_pos-	ACT	-0.107922	0.183141	Thr	1	1	1	0
PC1_neg-PC2_pos-	ACA	-0.146377	0.0784204	Thr	0	1	2	0
PC1_neg-PC2_pos-	ACG	-0.12596	0.0212193	Thr	0	1	1	1
PC1_pos-PC2_neg-	ACC	0.144306	-0.096848	Thr	0	2	1	0
PC1_neg-PC2_pos-	TAT	-0.128549	0.108108	Tyr	2	0	1	0
PC1_pos-PC2_neg-	TAC	0.128549	-0.108108	Tyr	1	1	1	0
PC1_neg-PC2_pos-	GTT	-0.0726096	0.259094	Val	2	0	0	1
PC1_neg-PC2_neg-	GTA	-0.140038	-0.0044664	Val	1	0	1	1
PC1_pos-PC2_neg-	GTG	0.151239	-0.0309161	Val	1	0	0	2
PC1_neg-PC2_neg-	GTC	-0.128866	-0.158271	Val	1	1	0	1

## Sheet: C57BL6J_NLW_DLW
Quad	Codon	PC1	PC2	PC3	AA	T	C	A	G
PC1_neg-PC2_neg-PC3_neg-	CTA	-0.123763	-0.140023	-0.0932148	Leu	1	1	1	0
PC1_neg-PC2_neg-PC3_neg-	GTT	-0.148676	-0.104358	-0.113883	Val	2	0	0	1
PC1_neg-PC2_neg-PC3_neg-	AAT	-0.100476	-0.225097	-0.097326	Asn	1	0	2	0
PC1_neg-PC2_neg-PC3_neg-	TCA	-0.163061	-0.00130101	-0.0279517	Ser	1	1	1	0
PC1_neg-PC2_neg-PC3_neg-	TGT	-0.159736	-0.036434	-0.0359633	Cys	2	0	0	1
PC1_neg-PC2_neg-PC3_neg-	CCT	-0.121765	-0.110928	-0.20201	Pro	1	2	0	0
PC1_neg-PC2_neg-PC3_neg-	ACT	-0.150977	-0.0984451	-0.0859388	Thr	1	1	1	0
PC1_neg-PC2_neg-PC3_neg-	ATA	-0.0896388	-0.113092	-0.225756	Ile	1	0	2	0
PC1_neg-PC2_neg-PC3_neg-	GGG	-0.136656	-0.167569	-0.0227654	Gly	0	0	0	3
PC1_neg-PC2_neg-PC3_pos-	TTC	-0.0902802	-0.0898486	0.32327	Phe	2	1	0	0
PC1_neg-PC2_neg-PC3_pos-	AGT	-0.151365	-0.0622765	0.0926823	Ser	1	0	1	1
PC1_neg-PC2_neg-PC3_pos-	GAC	-0.157745	-0.00780409	0.0643856	Asp	0	1	1	1
PC1_neg-PC2_neg-PC3_pos-	CTC	-0.114096	-0.215209	0.0584419	Leu	1	2	0	0
PC1_neg-PC2_neg-PC3_pos-	CGA	-0.116703	-0.159517	0.143313	Arg	0	1	1	1
PC1_neg-PC2_neg-PC3_pos-	GCG	-0.0802125	-0.184607	0.00836192	Ala	0	1	0	2
PC1_neg-PC2_neg-PC3_pos-	CCG	-0.0500727	-0.240892	0.192134	Pro	0	2	0	1
PC1_neg-PC2_neg-PC3_pos-	TTA	-0.156703	-0.0445255	0.122617	Leu	2	0	1	0
PC1_neg-PC2_pos-PC3_neg-	GCA	-0.161785	0.0375127	-0.0317587	Ala	0	1	1	1
PC1_neg-PC2_pos-PC3_neg-	CAT	-0.154462	0.0717922	-0.0846011	His	1	1	1	0
PC1_neg-PC2_pos-PC3_neg-	GGA	-0.130165	0.189967	-0.0560325	Gly	0	0	1	2
PC1_neg-PC2_pos-PC3_neg-	TAT	-0.0849235	0.184397	-0.279233	Tyr	2	0	1	0
PC1_neg-PC2_pos-PC3_neg-	AGA	-0.112842	0.22288	-0.0283382	Arg	0	0	2	1
PC1_neg-PC2_pos-PC3_neg-	CTT	-0.141475	0.128694	-0.103763	Leu	2	1	0	0
PC1_neg-PC2_pos-PC3_neg-	CCA	-0.111461	0.221329	-0.0169021	Pro	0	2	1	0
PC1_neg-PC2_pos-PC3_neg-	TTG	-0.15731	0.0143703	-0.083973	Leu	2	0	0	1
PC1_neg-PC2_pos-PC3_pos-	GTA	-0.14682	0.0747887	0.128596	Val	1	0	1	1
PC1_neg-PC2_pos-PC3_pos-	ACA	-0.15836	0.0227878	0.0185638	Thr	0	1	2	0
PC1_neg-PC2_pos-PC3_pos-	CAA	-0.154017	0.0879373	0.0788205	Gln	0	1	2	0
PC1_neg-PC2_pos-PC3_pos-	AAA	-0.144828	0.111224	0.123358	Lys	0	0	3	0
PC1_neg-PC2_pos-PC3_pos-	ATT	-0.0484761	0.163997	0.231246	Ile	2	0	1	0
PC1_neg-PC2_pos-PC3_pos-	GAA	-0.09492	0.134585	0.145528	Glu	0	0	2	1
PC1_pos-PC2_neg-PC3_neg-	AGC	0.150735	-0.100656	-0.0816823	Ser	0	1	1	1
PC1_pos-PC2_neg-PC3_neg-	AAG	0.144828	-0.111224	-0.123358	Lys	0	0	2	1
PC1_pos-PC2_neg-PC3_neg-	GAG	0.09492	-0.134585	-0.145528	Glu	0	0	1	2
PC1_pos-PC2_neg-PC3_neg-	CAG	0.154017	-0.0879373	-0.0788205	Gln	0	1	1	1
PC1_pos-PC2_neg-PC3_neg-	ACG	0.163903	-0.000957674	-0.039096	Thr	0	1	1	1
PC1_pos-PC2_neg-PC3_neg-	CGT	0.152282	-0.0270209	-0.122089	Arg	1	1	0	1
PC1_pos-PC2_neg-PC3_neg-	TCT	0.054478	-0.173176	-0.0674458	Ser	2	1	0	0
PC1_pos-PC2_neg-PC3_neg-	GTG	0.162873	-0.0283127	-0.0139765	Val	1	0	0	2
PC1_pos-PC2_neg-PC3_neg-	CGG	0.0186865	-0.280562	-0.00230029	Arg	0	1	0	2
PC1_pos-PC2_neg-PC3_pos-	CCC	0.159667	-0.0607933	0.0510437	Pro	0	3	0	0
PC1_pos-PC2_neg-PC3_pos-	CAC	0.154462	-0.0717922	0.0846011	His	0	2	1	0
PC1_pos-PC2_neg-PC3_pos-	TAC	0.0849235	-0.184397	0.279233	Tyr	1	1	1	0
PC1_pos-PC2_neg-PC3_pos-	GGC	0.159936	-0.0208308	0.0941717	Gly	0	1	0	2
PC1_pos-PC2_neg-PC3_pos-	ATC	0.117293	-0.0143043	0.0407295	Ile	1	1	1	0
PC1_pos-PC2_neg-PC3_pos-	CGC	0.130567	-0.120544	0.0460966	Arg	0	2	0	1
PC1_pos-PC2_neg-PC3_pos-	GCC	0.1564	-0.0538261	0.111556	Ala	0	2	0	1
PC1_pos-PC2_pos-PC3_neg-	TTT	0.0902802	0.0898486	-0.32327	Phe	3	0	0	0
PC1_pos-PC2_pos-PC3_neg-	GGT	0.152946	0.0322074	-0.0594407	Gly	1	0	0	2
PC1_pos-PC2_pos-PC3_neg-	GCT	0.0996138	0.079336	-0.274263	Ala	1	1	0	1
PC1_pos-PC2_pos-PC3_neg-	GAT	0.157745	0.00780409	-0.0643856	Asp	1	0	1	1
PC1_pos-PC2_pos-PC3_pos-	AGG	0.0484435	0.0417751	0.0790747	Arg	0	0	1	2
PC1_pos-PC2_pos-PC3_pos-	ACC	0.158324	0.0655207	0.0680746	Thr	0	2	1	0
PC1_pos-PC2_pos-PC3_pos-	AAC	0.100476	0.225097	0.097326	Asn	0	1	2	0
PC1_pos-PC2_pos-PC3_pos-	CTG	0.162549	0.0390984	0.0444476	Leu	1	1	0	1
PC1_pos-PC2_pos-PC3_pos-	GTC	0.0884305	0.213331	0.139562	Val	1	1	0	1
PC1_pos-PC2_pos-PC3_pos-	TCC	0.0965209	0.248855	0.00515419	Ser	1	2	0	0
PC1_pos-PC2_pos-PC3_pos-	TGC	0.159736	0.036434	0.0359633	Cys	1	1	0	1
PC1_pos-PC2_pos-PC3_pos-	TCG	0.0806427	0.107225	0.197296	Ser	1	1	0	1

## Sheet: CD1_NLW_DLW
Quad	Codon	PC1	PC2	PC3	AA	T	C	G	A
PC1_neg-PC2_neg-PC3_neg-	CTC	-0.0930978	-0.089312	-0.28331	Leu	1	2	0	0
PC1_neg-PC2_neg-PC3_neg-	GCG	-0.152481	-0.0601711	-0.115553	Ala	0	1	2	0
PC1_neg-PC2_neg-PC3_neg-	CGG	-0.132444	-0.0207278	-0.190137	Arg	0	1	2	0
PC1_neg-PC2_neg-PC3_neg-	CGA	-0.136381	-0.0515079	-0.18394	Arg	0	1	1	1
PC1_neg-PC2_neg-PC3_neg-	GGG	-0.151745	-0.0548043	-0.118367	Gly	0	0	3	0
PC1_neg-PC2_neg-PC3_neg-	CGC	-0.107936	-0.186925	-0.135211	Arg	0	2	1	0
PC1_neg-PC2_neg-PC3_neg-	GAG	-0.156121	-0.0703167	-0.0580619	Glu	0	0	2	1
PC1_neg-PC2_neg-PC3_neg-	ATC	-0.116269	-0.026393	-0.221254	Ile	1	1	0	1
PC1_neg-PC2_neg-PC3_pos-	ACG	-0.078813	-0.246161	0.00663482	Thr	0	1	1	1
PC1_neg-PC2_neg-PC3_pos-	CAT	-0.136772	-0.151525	0.0799866	His	1	1	0	1
PC1_neg-PC2_neg-PC3_pos-	GGA	-0.136501	-0.00368061	0.204931	Gly	0	0	2	1
PC1_neg-PC2_neg-PC3_pos-	TAT	-0.0788076	-0.0897142	0.269799	Tyr	2	0	0	1
PC1_neg-PC2_neg-PC3_pos-	GTT	-0.0873804	-0.237767	0.0530591	Val	2	0	1	0
PC1_neg-PC2_neg-PC3_pos-	ACT	-0.140586	-0.00634529	0.0581712	Thr	1	1	0	1
PC1_neg-PC2_neg-PC3_pos-	CTT	-0.149413	-0.00862365	0.125454	Leu	2	1	0	0
PC1_neg-PC2_neg-PC3_pos-	TTA	-0.146991	-0.0401457	0.028373	Leu	2	0	0	1
PC1_neg-PC2_neg-PC3_pos-	CTA	-0.0909443	-0.1944	0.0774825	Leu	1	1	0	1
PC1_neg-PC2_neg-PC3_pos-	TTG	-0.137053	-0.0960839	0.093668	Leu	2	0	1	0
PC1_neg-PC2_neg-PC3_pos-	ACA	-0.146579	-0.12763	0.0832205	Thr	0	1	0	2
PC1_neg-PC2_pos-PC3_neg-	CCG	-0.144791	0.0675545	-0.139775	Pro	0	2	1	0
PC1_neg-PC2_pos-PC3_neg-	TTC	-0.0818708	0.189578	-0.225052	Phe	2	1	0	0
PC1_neg-PC2_pos-PC3_neg-	TCA	-0.158741	0.0807019	-0.0181989	Ser	1	1	0	1
PC1_neg-PC2_pos-PC3_neg-	TGT	-0.134729	0.0985663	-0.0209093	Cys	2	0	1	0
PC1_neg-PC2_pos-PC3_neg-	GAC	-0.157703	0.05526	-0.0852107	Asp	0	1	1	1
PC1_neg-PC2_pos-PC3_neg-	TCG	-0.153791	0.0799934	-0.0392451	Ser	1	1	1	0
PC1_neg-PC2_pos-PC3_pos-	GTA	-0.140804	0.0765726	0.0264982	Val	1	0	1	1
PC1_neg-PC2_pos-PC3_pos-	CCA	-0.128718	0.074077	0.215982	Pro	0	2	0	1
PC1_neg-PC2_pos-PC3_pos-	AGA	-0.0137673	0.0160734	0.367399	Arg	0	0	1	2
PC1_neg-PC2_pos-PC3_pos-	GTC	-0.0919657	0.216326	0.00878964	Val	1	1	1	0
PC1_neg-PC2_pos-PC3_pos-	CAA	-0.0653141	0.267823	0.102861	Gln	0	1	0	2
PC1_neg-PC2_pos-PC3_pos-	GCA	-0.165981	0.0088871	0.0472089	Ala	0	1	1	1
PC1_neg-PC2_pos-PC3_pos-	AGT	-0.156967	0.0426559	0.0124257	Ser	1	0	1	1
PC1_neg-PC2_pos-PC3_pos-	AAA	-0.144937	0.146992	0.0313774	Lys	0	0	0	3
PC1_neg-PC2_pos-PC3_pos-	TCC	-0.146003	0.0438466	0.136538	Ser	1	2	0	0
PC1_neg-PC2_pos-PC3_pos-	AAC	-0.0265908	0.27103	0.0864809	Asn	0	1	0	2
PC1_pos-PC2_neg-PC3_neg-	CCT	0.122421	-0.118916	-0.0667611	Pro	1	2	0	0
PC1_pos-PC2_neg-PC3_neg-	CGT	0.151263	-0.114967	-0.0176105	Arg	1	1	1	0
PC1_pos-PC2_neg-PC3_neg-	CCC	0.156866	-0.0640444	-0.0704711	Pro	0	3	0	0
PC1_pos-PC2_neg-PC3_neg-	AAG	0.144937	-0.146992	-0.0313774	Lys	0	0	1	2
PC1_pos-PC2_neg-PC3_neg-	AAT	0.0265908	-0.27103	-0.0864809	Asn	1	0	0	2
PC1_pos-PC2_neg-PC3_neg-	AGC	0.160438	-0.0800383	-0.0466657	Ser	0	1	1	1
PC1_pos-PC2_neg-PC3_neg-	CAG	0.0653141	-0.267823	-0.102861	Gln	0	1	1	1
PC1_pos-PC2_neg-PC3_pos-	GAT	0.157703	-0.05526	0.0852107	Asp	1	0	1	1
PC1_pos-PC2_neg-PC3_pos-	TGC	0.134729	-0.0985663	0.0209093	Cys	1	1	1	0
PC1_pos-PC2_neg-PC3_pos-	GGT	0.15056	-0.0944325	0.0245885	Gly	1	0	2	0
PC1_pos-PC2_neg-PC3_pos-	TTT	0.0818708	-0.189578	0.225052	Phe	3	0	0	0
PC1_pos-PC2_neg-PC3_pos-	TCT	0.164244	-0.041205	0.0151155	Ser	2	1	0	0
PC1_pos-PC2_pos-PC3_neg-	GGC	0.110131	0.199492	-0.0924687	Gly	0	1	2	0
PC1_pos-PC2_pos-PC3_neg-	ACC	0.146546	0.142243	-0.0643224	Thr	0	2	0	1
PC1_pos-PC2_pos-PC3_neg-	CTG	0.159266	0.0969467	-0.0167132	Leu	1	1	1	0
PC1_pos-PC2_pos-PC3_neg-	TAC	0.0788076	0.0897142	-0.269799	Tyr	1	1	0	1
PC1_pos-PC2_pos-PC3_neg-	GCC	0.157586	0.0241207	-0.110297	Ala	0	2	1	0
PC1_pos-PC2_pos-PC3_neg-	GTG	0.159444	0.0460967	-0.0528509	Val	1	0	2	0
PC1_pos-PC2_pos-PC3_neg-	CAC	0.136772	0.151525	-0.0799866	His	0	2	0	1
PC1_pos-PC2_pos-PC3_pos-	GAA	0.156121	0.0703167	0.0580619	Glu	0	0	1	2
PC1_pos-PC2_pos-PC3_pos-	ATT	0.0897182	0.0183314	0.148495	Ile	2	0	0	1
PC1_pos-PC2_pos-PC3_pos-	ATA	0.104608	0.0257675	0.221155	Ile	1	0	0	2
PC1_pos-PC2_pos-PC3_pos-	AGG	0.0930437	0.245318	0.0494718	Arg	0	0	2	1
PC1_pos-PC2_pos-PC3_pos-	GCT	0.161071	0.00934109	0.0992058	Ala	1	1	1	0

## Sheet: C57BL6_NEW_DEW
Quad	Codon	PC1	PC2	PC3	AA	T	C	G	A
PC1_neg-PC2_neg-PC3_neg-	CTA	-0.110587	-0.0845331	-0.0762897	Leu	1	1	0	1
PC1_neg-PC2_neg-PC3_neg-	CCA	-0.124371	-0.00763084	-0.201264	Pro	0	2	0	1
PC1_neg-PC2_neg-PC3_neg-	TCA	-0.142429	-0.0258449	-0.103384	Ser	1	1	0	1
PC1_neg-PC2_neg-PC3_neg-	AAA	-0.156803	-0.0209081	-0.0833941	Lys	0	0	0	3
PC1_neg-PC2_neg-PC3_neg-	CAT	-0.158625	-0.0260795	-0.0633293	His	1	1	0	1
PC1_neg-PC2_neg-PC3_neg-	ACG	-0.0831765	-0.202242	-0.109914	Thr	0	1	1	1
PC1_neg-PC2_neg-PC3_neg-	TTA	-0.135065	-0.0856249	-0.0455503	Leu	2	0	0	1
PC1_neg-PC2_neg-PC3_neg-	TTT	-0.159922	-0.0632227	-0.0584453	Phe	3	0	0	0
PC1_neg-PC2_neg-PC3_neg-	ACA	-0.156469	-0.00973805	-0.10967	Thr	0	1	0	2
PC1_neg-PC2_neg-PC3_pos-	AGA	-0.136227	-0.134605	0.0846631	Arg	0	0	1	2
PC1_neg-PC2_neg-PC3_pos-	ACT	-0.137825	-0.0926972	0.0734284	Thr	1	1	0	1
PC1_neg-PC2_neg-PC3_pos-	GAA	-0.151513	-0.128275	0.0384939	Glu	0	0	1	2
PC1_neg-PC2_neg-PC3_pos-	GTT	-0.157022	-0.067391	0.0679222	Val	2	0	1	0
PC1_neg-PC2_neg-PC3_pos-	CAA	-0.123363	-0.04546	0.208426	Gln	0	1	0	2
PC1_neg-PC2_neg-PC3_pos-	GGA	-0.00692986	-0.297256	0.0530267	Gly	0	0	2	1
PC1_neg-PC2_neg-PC3_pos-	GGT	-0.140092	-0.0471493	0.207524	Gly	1	0	2	0
PC1_neg-PC2_pos-PC3_neg-	AAT	-0.126909	0.0911378	-0.0563489	Asn	1	0	0	2
PC1_neg-PC2_pos-PC3_neg-	GAT	-0.164423	0.0281392	-0.0286422	Asp	1	0	1	1
PC1_neg-PC2_pos-PC3_neg-	ATT	-0.157686	0.0119648	-0.0312902	Ile	2	0	0	1
PC1_neg-PC2_pos-PC3_neg-	ATA	-0.143046	0.133451	-0.0128308	Ile	1	0	0	2
PC1_neg-PC2_pos-PC3_neg-	CTG	-0.0217734	0.277161	-0.0980108	Leu	1	1	1	0
PC1_neg-PC2_pos-PC3_neg-	TGT	-0.157212	0.0472107	-0.0416041	Cys	2	0	1	0
PC1_neg-PC2_pos-PC3_neg-	GTA	-0.152935	0.070629	-0.109473	Val	1	0	1	1
PC1_neg-PC2_pos-PC3_neg-	TTG	-0.102147	0.202093	-0.0676058	Leu	2	0	1	0
PC1_neg-PC2_pos-PC3_neg-	TAT	-0.160688	0.0112104	-0.0535171	Tyr	2	0	0	1
PC1_neg-PC2_pos-PC3_neg-	AGT	-0.163555	0.000820143	-0.0262694	Ser	1	0	1	1
PC1_neg-PC2_pos-PC3_neg-	GCA	-0.142095	0.0120881	-0.115542	Ala	0	1	1	1
PC1_neg-PC2_pos-PC3_pos-	TCT	-0.0635587	0.162118	0.292807	Ser	2	1	0	0
PC1_neg-PC2_pos-PC3_pos-	CGT	-0.0930695	0.212353	0.156283	Arg	1	1	1	0
PC1_neg-PC2_pos-PC3_pos-	AGG	-0.0637627	0.130996	0.0210993	Arg	0	0	2	1
PC1_neg-PC2_pos-PC3_pos-	GCT	-0.154786	0.0176316	0.0831705	Ala	1	1	1	0
PC1_pos-PC2_neg-PC3_neg-	GCG	0.0635313	-0.1091	-0.250963	Ala	0	1	2	0
PC1_pos-PC2_neg-PC3_neg-	TCG	0.0735209	-0.153476	-0.245373	Ser	1	1	1	0
PC1_pos-PC2_neg-PC3_neg-	CCG	0.0545118	-0.220811	-0.271397	Pro	0	2	1	0
PC1_pos-PC2_neg-PC3_neg-	CGG	0.0217165	-0.161831	-0.255059	Arg	0	1	2	0
PC1_pos-PC2_neg-PC3_neg-	CGA	0.0771366	-0.287486	-0.0214833	Arg	0	1	1	1
PC1_pos-PC2_neg-PC3_neg-	AGC	0.127392	-0.200222	-0.026274	Ser	0	1	1	1
PC1_pos-PC2_neg-PC3_pos-	TAC	0.160744	-0.0165336	0.0506644	Tyr	1	1	0	1
PC1_pos-PC2_neg-PC3_pos-	TGC	0.157313	-0.0440558	0.0435568	Cys	1	1	1	0
PC1_pos-PC2_neg-PC3_pos-	GTC	0.154371	-0.0115426	0.072948	Val	1	1	1	0
PC1_pos-PC2_neg-PC3_pos-	ATC	0.160934	-0.0567128	0.0325031	Ile	1	1	0	1
PC1_pos-PC2_neg-PC3_pos-	GAC	0.164414	-0.0281439	0.0294248	Asp	0	1	1	1
PC1_pos-PC2_neg-PC3_pos-	AAC	0.126255	-0.0906506	0.0611095	Asn	0	1	0	2
PC1_pos-PC2_neg-PC3_pos-	CCT	0.000746229	-0.148186	0.322871	Pro	1	2	0	0
PC1_pos-PC2_neg-PC3_pos-	CTT	0.0375073	-0.299872	0.101648	Leu	2	1	0	0
PC1_pos-PC2_pos-PC3_neg-	GGC	0.108271	0.217957	-0.143011	Gly	0	1	2	0
PC1_pos-PC2_pos-PC3_neg-	GGG	0.055625	0.108255	-0.360405	Gly	0	0	3	0
PC1_pos-PC2_pos-PC3_neg-	CGC	0.150815	0.101001	-0.0656778	Arg	0	2	1	0
PC1_pos-PC2_pos-PC3_neg-	CAG	0.122831	0.0519586	-0.211896	Gln	0	1	1	1
PC1_pos-PC2_pos-PC3_neg-	GAG	0.155868	0.094799	-0.0517281	Glu	0	0	2	1
PC1_pos-PC2_pos-PC3_neg-	GTG	0.140654	0.0426913	-0.106233	Val	1	0	2	0
PC1_pos-PC2_pos-PC3_neg-	CCC	0.040563	0.291236	-0.0227335	Pro	0	3	0	0
PC1_pos-PC2_pos-PC3_pos-	TCC	0.112665	0.166081	0.0282934	Ser	1	2	0	0
PC1_pos-PC2_pos-PC3_pos-	GCC	0.163123	0.0111934	0.0286069	Ala	0	2	1	0
PC1_pos-PC2_pos-PC3_pos-	CTC	0.16026	0.0151613	0.0783563	Leu	1	2	0	0
PC1_pos-PC2_pos-PC3_pos-	AAG	0.157005	0.0122447	0.0796166	Lys	0	0	1	2
PC1_pos-PC2_pos-PC3_pos-	TTC	0.162131	0.0312662	0.0374378	Phe	2	1	0	0
PC1_pos-PC2_pos-PC3_pos-	CAC	0.159224	0.00594457	0.0525147	His	0	2	0	1
PC1_pos-PC2_pos-PC3_pos-	ACC	0.163141	0.0287915	0.0402685	Thr	0	2	0	1

## Sheet: C57BL6J_NEW_DEW
Quad	Codon	PC1	PC2	PC3	PC4	AA	T	C	A	G
PC1_neg-PC2_neg-PC3_neg-PC4_neg-	TCG	-0.00581246	-0.0048302	-0.178295	-0.333552	Ser	1	1	0	1
PC1_neg-PC2_neg-PC3_neg-PC4_neg-	TTT	-0.201679	-0.00228542	-0.071305	-0.0266012	Phe	3	0	0	0
PC1_neg-PC2_neg-PC3_neg-PC4_neg-	CCG	-0.0378314	-0.0578033	-0.260326	-0.153309	Pro	0	2	0	1
PC1_neg-PC2_neg-PC3_neg-PC4_neg-	CGG	-0.0790192	-0.0603216	-0.230236	-0.12307	Arg	0	1	0	2
PC1_neg-PC2_neg-PC3_neg-PC4_neg-	ACG	-0.0168888	-0.113603	-0.0388928	-0.0434037	Thr	0	1	1	1
PC1_neg-PC2_neg-PC3_neg-PC4_neg-	CAT	-0.201834	-0.0638527	-0.0126374	-0.0462236	His	1	1	1	0
PC1_neg-PC2_neg-PC3_neg-PC4_neg-	TGT	-0.201974	-0.0283208	-0.0533703	-0.0459319	Cys	2	0	0	1
PC1_neg-PC2_neg-PC3_neg-PC4_pos-	GGG	-0.0925695	-0.145968	-0.214382	0.078466	Gly	0	0	0	3
PC1_neg-PC2_neg-PC3_neg-PC4_pos-	AGT	-0.18133	-0.0479917	-0.0227626	0.186109	Ser	1	0	1	1
PC1_neg-PC2_neg-PC3_neg-PC4_pos-	TTA	-0.183262	-0.032469	-0.019626	0.0332192	Leu	2	0	1	0
PC1_neg-PC2_neg-PC3_neg-PC4_pos-	AGG	-0.0413342	-0.0901289	-0.0506539	0.391862	Arg	0	0	1	2
PC1_neg-PC2_neg-PC3_pos-PC4_neg-	TCC	-0.0465873	-0.156446	0.237435	-0.0210569	Ser	1	2	0	0
PC1_neg-PC2_neg-PC3_pos-PC4_neg-	AAC	-0.0443333	-0.178188	0.10486	-0.256933	Asn	0	1	2	0
PC1_neg-PC2_neg-PC3_pos-PC4_neg-	CTG	-0.104901	-0.204254	0.0586288	-0.051937	Leu	1	1	0	1
PC1_neg-PC2_neg-PC3_pos-PC4_neg-	ACT	-0.164193	-0.0238356	0.0827752	-0.243446	Thr	1	1	1	0
PC1_neg-PC2_neg-PC3_pos-PC4_neg-	ATT	-0.183745	-0.0313329	0.0878258	-0.0655003	Ile	2	0	1	0
PC1_neg-PC2_neg-PC3_pos-PC4_pos-	GTA	-0.195738	-0.0286245	0.0174428	0.0776642	Val	1	0	1	1
PC1_neg-PC2_neg-PC3_pos-PC4_pos-	GGC	-0.0281138	-0.254447	0.0478373	0.0758802	Gly	0	1	0	2
PC1_neg-PC2_pos-PC3_neg-PC4_neg-	TAT	-0.178429	0.0325195	-0.104607	-0.00159937	Tyr	2	0	1	0
PC1_neg-PC2_pos-PC3_neg-PC4_neg-	GAA	-0.0661621	0.229545	-0.0289475	-0.0443329	Glu	0	0	2	1
PC1_neg-PC2_pos-PC3_neg-PC4_pos-	ACA	-0.163758	0.0676197	-0.0938246	0.11799	Thr	0	1	2	0
PC1_neg-PC2_pos-PC3_neg-PC4_pos-	TCA	-0.0324892	0.16471	-0.18571	0.0626962	Ser	1	1	1	0
PC1_neg-PC2_pos-PC3_neg-PC4_pos-	GCA	-0.0822413	0.0170282	-0.126237	0.245183	Ala	0	1	1	1
PC1_neg-PC2_pos-PC3_neg-PC4_pos-	AGA	-0.135044	0.174218	-0.0669656	0.0657436	Arg	0	0	2	1
PC1_neg-PC2_pos-PC3_neg-PC4_pos-	CCA	-0.170716	0.0282918	-0.101832	0.0320997	Pro	0	2	1	0
PC1_neg-PC2_pos-PC3_pos-PC4_neg-	GAT	-0.198561	0.00816957	0.00885879	-0.0995467	Asp	1	0	1	1
PC1_neg-PC2_pos-PC3_pos-PC4_neg-	GTT	-0.148537	0.0858881	0.126406	-0.051138	Val	2	0	0	1
PC1_neg-PC2_pos-PC3_pos-PC4_neg-	AAA	-0.051353	0.250523	0.0384417	-0.133969	Lys	0	0	3	0
PC1_neg-PC2_pos-PC3_pos-PC4_neg-	GCT	-0.124989	0.0342271	0.222657	-0.0835845	Ala	1	1	0	1
PC1_neg-PC2_pos-PC3_pos-PC4_pos-	CAA	-0.0690864	0.131555	0.203753	0.00389144	Gln	0	1	2	0
PC1_pos-PC2_neg-PC3_neg-PC4_neg-	GTG	0.0642014	-0.171688	-0.158319	-0.119149	Val	1	0	0	2
PC1_pos-PC2_neg-PC3_neg-PC4_neg-	GCC	0.191464	-0.055369	-0.0857818	-0.0148656	Ala	0	2	0	1
PC1_pos-PC2_neg-PC3_neg-PC4_neg-	CAG	0.0579914	-0.162477	-0.169565	-0.128886	Gln	0	1	1	1
PC1_pos-PC2_neg-PC3_neg-PC4_neg-	GCG	0.0584885	-0.070525	-0.232925	-0.1781	Ala	0	1	0	2
PC1_pos-PC2_neg-PC3_neg-PC4_neg-	AAG	0.0484826	-0.242914	-0.0696209	-0.0460581	Lys	0	0	2	1
PC1_pos-PC2_neg-PC3_neg-PC4_neg-	ATC	0.15092	-0.102303	-0.124552	-0.0609164	Ile	1	1	1	0
PC1_pos-PC2_neg-PC3_neg-PC4_neg-	GAG	0.0703007	-0.257605	-0.0144623	-0.0681184	Glu	0	0	1	2
PC1_pos-PC2_neg-PC3_neg-PC4_pos-	TTG	0.0300492	-0.00245063	-0.223717	0.00279514	Leu	2	0	0	1
PC1_pos-PC2_neg-PC3_neg-PC4_pos-	GAC	0.199152	-0.0194321	-0.0193701	0.0828672	Asp	0	1	1	1
PC1_pos-PC2_neg-PC3_pos-PC4_neg-	TAC	0.179032	-0.0421685	0.106004	-0.0256486	Tyr	1	1	1	0
PC1_pos-PC2_neg-PC3_pos-PC4_neg-	CGT	0.0182697	-0.0279462	0.247521	-0.116534	Arg	1	1	0	1
PC1_pos-PC2_neg-PC3_pos-PC4_neg-	CGC	0.122729	-0.174684	0.0955852	-0.0725721	Arg	0	2	0	1
PC1_pos-PC2_neg-PC3_pos-PC4_pos-	CCC	0.0420797	-0.248077	0.112278	0.0850429	Pro	0	3	0	0
PC1_pos-PC2_neg-PC3_pos-PC4_pos-	TTC	0.201476	-0.00442653	0.0740821	0.00964027	Phe	2	1	0	0
PC1_pos-PC2_neg-PC3_pos-PC4_pos-	ACC	0.207218	-0.0388269	0.00275872	0.0304742	Thr	0	2	1	0
PC1_pos-PC2_pos-PC3_neg-PC4_neg-	CGA	0.0552768	0.18016	-0.185088	-0.148674	Arg	0	1	1	1
PC1_pos-PC2_pos-PC3_neg-PC4_neg-	GGA	0.111109	0.201445	-0.1295	-0.0219145	Gly	0	0	1	2
PC1_pos-PC2_pos-PC3_neg-PC4_neg-	AGC	0.14847	0.0402494	-0.171898	-0.102095	Ser	0	1	1	1
PC1_pos-PC2_pos-PC3_neg-PC4_pos-	AAT	0.0590193	0.140372	-0.161569	0.195864	Asn	1	0	2	0
PC1_pos-PC2_pos-PC3_neg-PC4_pos-	CTC	0.195377	0.0540462	-0.0149537	0.0971412	Leu	1	2	0	0
PC1_pos-PC2_pos-PC3_neg-PC4_pos-	CTA	0.0606588	0.186859	-0.0528474	0.0939141	Leu	1	1	1	0
PC1_pos-PC2_pos-PC3_pos-PC4_neg-	GGT	0.0117198	0.146612	0.19974	-0.248539	Gly	1	0	0	2
PC1_pos-PC2_pos-PC3_pos-PC4_neg-	CTT	0.0313827	0.192281	0.0118237	-0.297507	Leu	2	1	0	0
PC1_pos-PC2_pos-PC3_pos-PC4_neg-	GTC	0.200514	0.0427128	0.032701	-0.0448362	Val	1	1	0	1
PC1_pos-PC2_pos-PC3_pos-PC4_neg-	CCT	0.11919	0.167482	0.114621	-0.047569	Pro	1	2	0	0
PC1_pos-PC2_pos-PC3_pos-PC4_pos-	TGC	0.202768	0.0211907	0.0490273	0.0349823	Cys	1	1	0	1
PC1_pos-PC2_pos-PC3_pos-PC4_pos-	CAC	0.202481	0.0589712	0.00874116	0.0394093	His	0	2	1	0
PC1_pos-PC2_pos-PC3_pos-PC4_pos-	ATA	0.00312522	0.225797	0.0444751	0.00691486	Ile	1	0	2	0
PC1_pos-PC2_pos-PC3_pos-PC4_pos-	TCT	0.0628738	0.00765253	0.226673	0.160249	Ser	2	1	0	0

## Sheet: C57BL6N_NEW_DEW
Quad	Codon	PC1	PC2	AA	T	C	G	A
PC1_neg-PC2_neg-	TCT	-0.12838	-0.17571	Ser	2	1	0	0
PC1_neg-PC2_neg-	TCC	-0.140619	-0.094778	Ser	1	2	0	0
PC1_neg-PC2_neg-	GCC	-0.142865	-0.0637708	Ala	0	2	1	0
PC1_neg-PC2_neg-	CGT	-0.10153	-0.0562647	Arg	1	1	1	0
PC1_neg-PC2_neg-	ACC	-0.143578	-0.0776716	Thr	0	2	0	1
PC1_neg-PC2_neg-	CCT	-0.0804252	-0.140218	Pro	1	2	0	0
PC1_neg-PC2_neg-	CCC	-0.143865	-0.0482641	Pro	0	3	0	0
PC1_neg-PC2_neg-	CTC	-0.141553	-0.0441748	Leu	1	2	0	0
PC1_neg-PC2_neg-	GAC	-0.145384	-0.0056081	Asp	0	1	1	1
PC1_neg-PC2_neg-	AAG	-0.145107	-0.00582637	Lys	0	0	1	2
PC1_neg-PC2_neg-	TTC	-0.146184	-0.00519199	Phe	2	1	0	0
PC1_neg-PC2_neg-	GTC	-0.14017	-0.0923794	Val	1	1	1	0
PC1_neg-PC2_neg-	GAG	-0.146558	-0.0119269	Glu	0	0	2	1
PC1_neg-PC2_pos-	ATC	-0.141881	0.07689	Ile	1	1	0	1
PC1_neg-PC2_pos-	TAC	-0.141539	0.0296037	Tyr	1	1	0	1
PC1_neg-PC2_pos-	AGG	-0.0573653	0.00626813	Arg	0	0	2	1
PC1_neg-PC2_pos-	GGC	-0.145627	0.0292722	Gly	0	1	2	0
PC1_neg-PC2_pos-	TGC	-0.143927	0.0530845	Cys	1	1	1	0
PC1_neg-PC2_pos-	CGC	-0.145832	0.0361667	Arg	0	2	1	0
PC1_neg-PC2_pos-	CAG	-0.104404	0.249366	Gln	0	1	1	1
PC1_neg-PC2_pos-	AAC	-0.0581582	0.366098	Asn	0	1	0	2
PC1_neg-PC2_pos-	CTG	-0.106324	0.155506	Leu	1	1	1	0
PC1_neg-PC2_pos-	CAC	-0.145692	0.0218547	His	0	2	0	1
PC1_neg-PC2_pos-	GTG	-0.128029	0.155245	Val	1	0	2	0
PC1_pos-PC2_neg-	GCA	0.144651	-0.015755	Ala	0	1	1	1
PC1_pos-PC2_neg-	CAT	0.145692	-0.0218547	His	1	1	0	1
PC1_pos-PC2_neg-	GGA	0.143205	-0.0687467	Gly	0	0	2	1
PC1_pos-PC2_neg-	TGT	0.143927	-0.0530845	Cys	2	0	1	0
PC1_pos-PC2_neg-	TTG	0.0232897	-0.368696	Leu	2	0	1	0
PC1_pos-PC2_neg-	TAT	0.141539	-0.0296037	Tyr	2	0	0	1
PC1_pos-PC2_neg-	CAA	0.104404	-0.249366	Gln	0	1	0	2
PC1_pos-PC2_neg-	AAT	0.0581582	-0.366098	Asn	1	0	0	2
PC1_pos-PC2_neg-	ACT	0.13646	-0.0795459	Thr	1	1	0	1
PC1_pos-PC2_neg-	ATT	0.138518	-0.0872568	Ile	2	0	0	1
PC1_pos-PC2_neg-	CGA	0.142339	-0.0532649	Arg	0	1	1	1
PC1_pos-PC2_neg-	AGA	0.131141	-0.0143938	Arg	0	0	1	2
PC1_pos-PC2_neg-	CTT	0.127158	-0.117661	Leu	2	1	0	0
PC1_pos-PC2_neg-	GGT	0.140124	-0.0605803	Gly	1	0	2	0
PC1_pos-PC2_pos-	AAA	0.145107	0.00582637	Lys	0	0	0	3
PC1_pos-PC2_pos-	AGT	0.127673	0.132482	Ser	1	0	1	1
PC1_pos-PC2_pos-	TCA	0.145756	0.00100859	Ser	1	1	0	1
PC1_pos-PC2_pos-	GTT	0.144461	0.00663284	Val	2	0	1	0
PC1_pos-PC2_pos-	GAA	0.146558	0.0119269	Glu	0	0	1	2
PC1_pos-PC2_pos-	GAT	0.145384	0.0056081	Asp	1	0	1	1
PC1_pos-PC2_pos-	AGC	0.0234844	0.33609	Ser	0	1	1	1
PC1_pos-PC2_pos-	ATA	0.0756398	0.0165605	Ile	1	0	0	2
PC1_pos-PC2_pos-	CCA	0.143297	0.0350794	Pro	0	2	0	1
PC1_pos-PC2_pos-	GGG	0.0711274	0.23308	Gly	0	0	3	0
PC1_pos-PC2_pos-	TTA	0.141235	0.0925957	Leu	2	0	0	1
PC1_pos-PC2_pos-	TCG	0.135743	0.0161477	Ser	1	1	1	0
PC1_pos-PC2_pos-	ACA	0.139286	0.110672	Thr	0	1	0	2
PC1_pos-PC2_pos-	GTA	0.139824	0.0131294	Val	1	0	1	1
PC1_pos-PC2_pos-	ACG	0.135571	0.138667	Thr	0	1	1	1
PC1_pos-PC2_pos-	GCG	0.1059	0.20051	Ala	0	1	2	0
PC1_pos-PC2_pos-	CCG	0.137193	0.0938289	Pro	0	2	1	0
PC1_pos-PC2_pos-	CGG	0.141316	0.0188205	Arg	0	1	2	0
PC1_pos-PC2_pos-	GCT	0.139639	0.0602865	Ala	1	1	1	0
PC1_pos-PC2_pos-	CTA	0.144354	0.0386266	Leu	1	1	0	1
PC1_pos-PC2_pos-	TTT	0.146184	0.00519199	Phe	3	0	0	0

## Sheet: C57BL6_NHW_DHW
Quad	Codon	PC1	PC2	AA	T	C	A	G
PC1_neg-PC2_neg-	TCG	-0.0818612	-0.152761	Ser	1	1	0	1
PC1_neg-PC2_neg-	AGC	-0.125662	-0.171374	Ser	0	1	1	1
PC1_neg-PC2_neg-	GTC	-0.0140749	-0.323428	Val	1	1	0	1
PC1_neg-PC2_neg-	TTC	-0.140838	-0.0580537	Phe	2	1	0	0
PC1_neg-PC2_neg-	GAC	-0.146557	-0.0190106	Asp	0	1	1	1
PC1_neg-PC2_neg-	AAC	-0.143407	-0.0608481	Asn	0	1	2	0
PC1_neg-PC2_neg-	GAG	-0.146101	-0.00129382	Glu	0	0	1	2
PC1_neg-PC2_neg-	TGC	-0.11547	-0.165498	Cys	1	1	0	1
PC1_neg-PC2_neg-	CGG	-0.140505	-0.00728951	Arg	0	1	0	2
PC1_neg-PC2_neg-	TAC	-0.132921	-0.158207	Tyr	1	1	1	0
PC1_neg-PC2_neg-	CAC	-0.11413	-0.230774	His	0	2	1	0
PC1_neg-PC2_neg-	GCG	-0.142007	-0.0402839	Ala	0	1	0	2
PC1_neg-PC2_pos-	ATC	-0.145735	0.0151889	Ile	1	1	1	0
PC1_neg-PC2_pos-	GTG	-0.145712	0.0282474	Val	1	0	0	2
PC1_neg-PC2_pos-	CTG	-0.145931	0.0139539	Leu	1	1	0	1
PC1_neg-PC2_pos-	CTC	-0.130152	0.1098	Leu	1	2	0	0
PC1_neg-PC2_pos-	CAG	-0.142995	0.057219	Gln	0	1	1	1
PC1_neg-PC2_pos-	ACG	-0.123649	0.0237339	Thr	0	1	1	1
PC1_neg-PC2_pos-	ACC	-0.146423	0.00689171	Thr	0	2	1	0
PC1_neg-PC2_pos-	CGC	-0.142644	0.0737163	Arg	0	2	0	1
PC1_neg-PC2_pos-	GGG	-0.119874	0.164454	Gly	0	0	0	3
PC1_neg-PC2_pos-	GCC	-0.142014	0.0648526	Ala	0	2	0	1
PC1_neg-PC2_pos-	GGC	-0.125146	0.163833	Gly	0	1	0	2
PC1_neg-PC2_pos-	CCC	-0.134311	0.159091	Pro	0	3	0	0
PC1_neg-PC2_pos-	CCG	-0.133626	0.0308887	Pro	0	2	0	1
PC1_neg-PC2_pos-	AAG	-0.143906	0.0621072	Lys	0	0	2	1
PC1_neg-PC2_pos-	TCC	-0.141387	0.0581978	Ser	1	2	0	0
PC1_pos-PC2_neg-	ACA	0.138443	-0.107235	Thr	0	1	2	0
PC1_pos-PC2_neg-	TTA	0.140607	-0.0549424	Leu	2	0	1	0
PC1_pos-PC2_neg-	GGT	0.0934155	-0.167849	Gly	1	0	0	2
PC1_pos-PC2_neg-	GCT	0.137426	-0.0901137	Ala	1	1	0	1
PC1_pos-PC2_neg-	AGG	0.00318752	-0.22179	Arg	0	0	1	2
PC1_pos-PC2_neg-	CCA	0.144568	-0.0313704	Pro	0	2	1	0
PC1_pos-PC2_neg-	CTT	0.142703	-0.0597018	Leu	2	1	0	0
PC1_pos-PC2_neg-	AGA	0.142792	-0.0741443	Arg	0	0	2	1
PC1_pos-PC2_neg-	CAA	0.142995	-0.057219	Gln	0	1	2	0
PC1_pos-PC2_neg-	ATA	0.142495	-0.0512935	Ile	1	0	2	0
PC1_pos-PC2_neg-	AGT	0.141401	-0.00716862	Ser	1	0	1	1
PC1_pos-PC2_neg-	GGA	0.133019	-0.150691	Gly	0	0	1	2
PC1_pos-PC2_neg-	AAA	0.143906	-0.0621072	Lys	0	0	3	0
PC1_pos-PC2_neg-	CCT	0.0904019	-0.263455	Pro	1	2	0	0
PC1_pos-PC2_neg-	CTA	0.141055	-0.0847069	Leu	1	1	1	0
PC1_pos-PC2_neg-	TCA	0.139331	-0.0784311	Ser	1	1	1	0
PC1_pos-PC2_pos-	AAT	0.143407	0.0608481	Asn	1	0	2	0
PC1_pos-PC2_pos-	ATT	0.142149	0.0270256	Ile	2	0	1	0
PC1_pos-PC2_pos-	GAT	0.146557	0.0190106	Asp	1	0	1	1
PC1_pos-PC2_pos-	ACT	0.137868	0.10762	Thr	1	1	1	0
PC1_pos-PC2_pos-	GAA	0.146101	0.00129382	Glu	0	0	2	1
PC1_pos-PC2_pos-	GTT	0.146191	0.0163255	Val	2	0	0	1
PC1_pos-PC2_pos-	TAT	0.132921	0.158207	Tyr	2	0	1	0
PC1_pos-PC2_pos-	TTT	0.140838	0.0580537	Phe	3	0	0	0
PC1_pos-PC2_pos-	TGT	0.11547	0.165498	Cys	2	0	0	1
PC1_pos-PC2_pos-	CAT	0.11413	0.230774	His	1	1	1	0
PC1_pos-PC2_pos-	CGT	0.0256802	0.288859	Arg	1	1	0	1
PC1_pos-PC2_pos-	CGA	0.0959994	0.180563	Arg	0	1	1	1
PC1_pos-PC2_pos-	GTA	0.139365	0.0112809	Val	1	0	1	1
PC1_pos-PC2_pos-	TTG	0.0319445	0.297342	Leu	2	0	0	1
PC1_pos-PC2_pos-	GCA	0.145039	0.030552	Ala	0	1	1	1
PC1_pos-PC2_pos-	TCT	0.105304	0.23915	Ser	2	1	0	0

## Sheet: C57BL6J_NHW_DHW
Quad	Codon	PC1	PC2	PC3	AA	T	C	A	G
PC1_neg-PC2_neg-PC3_neg-	ATA	-0.14094	-0.0745093	-0.133862	Ile	1	0	2	0
PC1_neg-PC2_neg-PC3_neg-	TTA	-0.129376	-0.0680456	-0.200085	Leu	2	0	1	0
PC1_neg-PC2_neg-PC3_neg-	ACA	-0.111092	-0.173158	-0.144297	Thr	0	1	2	0
PC1_neg-PC2_neg-PC3_neg-	AGG	-0.00355271	-0.178096	-0.332204	Arg	0	0	1	2
PC1_neg-PC2_neg-PC3_neg-	AAA	-0.152211	-0.0978937	-0.0540676	Lys	0	0	3	0
PC1_neg-PC2_neg-PC3_neg-	TCA	-0.117447	-0.11961	-0.229174	Ser	1	1	1	0
PC1_neg-PC2_neg-PC3_neg-	AGA	-0.14462	-0.124551	-0.0594661	Arg	0	0	2	1
PC1_neg-PC2_neg-PC3_neg-	CCA	-0.151005	-0.0405285	-0.0133759	Pro	0	2	1	0
PC1_neg-PC2_neg-PC3_pos-	CAA	-0.149329	-0.077067	0.06669	Gln	0	1	2	0
PC1_neg-PC2_neg-PC3_pos-	CCT	-0.0867381	-0.240184	0.160038	Pro	1	2	0	0
PC1_neg-PC2_neg-PC3_pos-	CTT	-0.149184	-0.083354	0.0897253	Leu	2	1	0	0
PC1_neg-PC2_neg-PC3_pos-	CTA	-0.125481	-0.136462	0.0747209	Leu	1	1	1	0
PC1_neg-PC2_neg-PC3_pos-	GCT	-0.138575	-0.116964	0.0836713	Ala	1	1	0	1
PC1_neg-PC2_neg-PC3_pos-	GGT	-0.107696	-0.166603	0.257261	Gly	1	0	0	2
PC1_neg-PC2_neg-PC3_pos-	AGT	-0.147863	-0.0202673	0.078261	Ser	1	0	1	1
PC1_neg-PC2_neg-PC3_pos-	GGA	-0.124128	-0.189768	0.0264658	Gly	0	0	1	2
PC1_neg-PC2_pos-PC3_neg-	TTG	-0.082021	0.187098	-0.116615	Leu	2	0	0	1
PC1_neg-PC2_pos-PC3_neg-	GTA	-0.127984	0.0351957	-0.174001	Val	1	0	1	1
PC1_neg-PC2_pos-PC3_neg-	TTT	-0.146839	0.0694831	-0.158383	Phe	3	0	0	0
PC1_neg-PC2_pos-PC3_neg-	TAT	-0.125618	0.170212	-0.0363713	Tyr	2	0	1	0
PC1_neg-PC2_pos-PC3_neg-	ATT	-0.136758	0.068747	-0.0252894	Ile	2	0	1	0
PC1_neg-PC2_pos-PC3_neg-	AAT	-0.151543	0.0830749	-0.072108	Asn	1	0	2	0
PC1_neg-PC2_pos-PC3_neg-	GAT	-0.161417	0.0456393	-0.0201958	Asp	1	0	1	1
PC1_neg-PC2_pos-PC3_pos-	CGA	-0.0766703	0.168929	0.211159	Arg	0	1	1	1
PC1_neg-PC2_pos-PC3_pos-	CGT	-0.00642336	0.228892	0.0838964	Arg	1	1	0	1
PC1_neg-PC2_pos-PC3_pos-	CAT	-0.111111	0.186467	0.0183095	His	1	1	1	0
PC1_neg-PC2_pos-PC3_pos-	TGT	-0.1328	0.104904	0.00341554	Cys	2	0	0	1
PC1_neg-PC2_pos-PC3_pos-	GCA	-0.154499	0.0677442	0.051504	Ala	0	1	1	1
PC1_neg-PC2_pos-PC3_pos-	GTT	-0.158797	0.0482179	0.0525264	Val	2	0	0	1
PC1_neg-PC2_pos-PC3_pos-	GAA	-0.16247	0.0454345	0.0333553	Glu	0	0	2	1
PC1_neg-PC2_pos-PC3_pos-	ACT	-0.124222	0.170295	0.0474518	Thr	1	1	1	0
PC1_neg-PC2_pos-PC3_pos-	TCT	-0.0792955	0.224027	0.0504272	Ser	2	1	0	0
PC1_pos-PC2_neg-PC3_neg-	CAC	0.112498	-0.202802	-0.0328649	His	0	2	1	0
PC1_pos-PC2_neg-PC3_neg-	TGC	0.132983	-0.118308	-0.0143636	Cys	1	1	0	1
PC1_pos-PC2_neg-PC3_neg-	ACC	0.160542	-0.00339952	-0.0520675	Thr	0	2	1	0
PC1_pos-PC2_neg-PC3_neg-	GAG	0.162353	-0.0499863	-0.0363977	Glu	0	0	1	2
PC1_pos-PC2_neg-PC3_neg-	TCG	0.101521	-0.0907013	-0.179195	Ser	1	1	0	1
PC1_pos-PC2_neg-PC3_neg-	GCG	0.144418	-0.0643201	-0.180282	Ala	0	1	0	2
PC1_pos-PC2_neg-PC3_pos-	CGG	0.118831	-0.115093	0.0411382	Arg	0	1	0	2
PC1_pos-PC2_neg-PC3_pos-	AGC	0.0867779	-0.231325	0.0210275	Ser	0	1	1	1
PC1_pos-PC2_neg-PC3_pos-	GTC	0.0956283	-0.203731	0.126551	Val	1	1	0	1
PC1_pos-PC2_neg-PC3_pos-	TTC	0.145588	-0.0780393	0.150317	Phe	2	1	0	0
PC1_pos-PC2_neg-PC3_pos-	GAC	0.160694	-0.051501	0.016978	Asp	0	1	1	1
PC1_pos-PC2_neg-PC3_pos-	TAC	0.124692	-0.187719	0.028254	Tyr	1	1	1	0
PC1_pos-PC2_neg-PC3_pos-	AAC	0.149052	-0.091645	0.068679	Asn	0	1	2	0
PC1_pos-PC2_neg-PC3_pos-	ACG	0.00963705	-0.0374788	0.412975	Thr	0	1	1	1
PC1_pos-PC2_pos-PC3_neg-	CTG	0.162219	0.00972571	-0.0145571	Leu	1	1	0	1
PC1_pos-PC2_pos-PC3_neg-	CAG	0.151189	0.0770181	-0.0737532	Gln	0	1	1	1
PC1_pos-PC2_pos-PC3_neg-	GCC	0.149979	0.0873075	-0.0204176	Ala	0	2	0	1
PC1_pos-PC2_pos-PC3_neg-	GGC	0.118481	0.190042	-0.149874	Gly	0	1	0	2
PC1_pos-PC2_pos-PC3_neg-	CCC	0.103669	0.226347	-0.00603303	Pro	0	3	0	0
PC1_pos-PC2_pos-PC3_neg-	CCG	0.136759	0.0573139	-0.238596	Pro	0	2	0	1
PC1_pos-PC2_pos-PC3_neg-	GTG	0.16	0.0182223	-0.0332542	Val	1	0	0	2
PC1_pos-PC2_pos-PC3_neg-	GGG	0.114897	0.183377	-0.16466	Gly	0	0	0	3
PC1_pos-PC2_pos-PC3_pos-	CGC	0.139305	0.113462	0.0895868	Arg	0	2	0	1
PC1_pos-PC2_pos-PC3_pos-	CTC	0.0679992	0.153505	0.251944	Leu	1	2	0	0
PC1_pos-PC2_pos-PC3_pos-	AAG	0.151895	0.0970657	0.0546363	Lys	0	0	2	1
PC1_pos-PC2_pos-PC3_pos-	ATC	0.157372	0.00389762	0.0942015	Ile	1	1	1	0
PC1_pos-PC2_pos-PC3_pos-	TCC	0.134389	0.0722795	0.0638478	Ser	1	2	0	0

## Sheet: CD1_NHW_DHW
Quad	Codon	PC1	PC2	PC3	PC4	PC5	AA	T	C	A	G
PC1_neg-PC2_neg-PC3_neg-PC4_neg-PC5_neg	ACG	-0.0211394	-0.213778	-0.0896214	-0.00176632	-0.142675	Thr	0	1	1	1
PC1_neg-PC2_neg-PC3_neg-PC4_neg-PC5_pos	ATA	-0.150521	-0.0111149	-0.159558	-0.0822589	0.221761	Ile	1	0	2	0
PC1_neg-PC2_neg-PC3_neg-PC4_neg-PC5_pos	TCA	-0.16042	-0.0363846	-0.14383	-0.141053	0.0225214	Ser	1	1	1	0
PC1_neg-PC2_neg-PC3_neg-PC4_pos-PC5_neg	TCG	-0.0842971	-0.115096	-0.129652	0.147388	-0.0406262	Ser	1	1	0	1
PC1_neg-PC2_neg-PC3_neg-PC4_pos-PC5_neg	CTA	-0.0610286	-0.224224	-0.0213606	0.0427836	-0.0854269	Leu	1	1	1	0
PC1_neg-PC2_neg-PC3_neg-PC4_pos-PC5_pos	AAA	-0.198238	-0.0973286	-0.0343235	0.128628	0.0855498	Lys	0	0	3	0
PC1_neg-PC2_neg-PC3_neg-PC4_pos-PC5_pos	CGA	-0.111341	-0.0699302	-0.0768989	0.263642	0.00110701	Arg	0	1	1	1
PC1_neg-PC2_neg-PC3_pos-PC4_neg-PC5_neg	CCT	-0.000379233	-0.248259	0.0428164	-0.0918661	-0.0853594	Pro	1	2	0	0
PC1_neg-PC2_neg-PC3_pos-PC4_neg-PC5_neg	GGT	-0.0507476	-0.231257	0.068397	-0.0726805	-0.178066	Gly	1	0	0	2
PC1_neg-PC2_neg-PC3_pos-PC4_neg-PC5_neg	GCT	-0.0348556	-0.162154	0.202338	-0.179938	-0.043585	Ala	1	1	0	1
PC1_neg-PC2_neg-PC3_pos-PC4_neg-PC5_pos	AGA	-0.111246	-0.0620488	0.220534	-0.0755894	0.18786	Arg	0	0	2	1
PC1_neg-PC2_neg-PC3_pos-PC4_pos-PC5_pos	CTT	-0.145128	-0.145522	0.0506689	0.15921	0.0159573	Leu	2	1	0	0
PC1_neg-PC2_neg-PC3_pos-PC4_pos-PC5_pos	GAA	-0.217682	-0.000292073	0.092312	0.0858208	0.00650391	Glu	0	0	2	1
PC1_neg-PC2_neg-PC3_pos-PC4_pos-PC5_pos	CAA	-0.149493	-0.184079	0.0176515	0.0283197	0.0624494	Gln	0	1	2	0
PC1_neg-PC2_neg-PC3_pos-PC4_pos-PC5_pos	GGA	-0.00570535	-0.12279	0.264256	0.0179135	0.105614	Gly	0	0	1	2
PC1_neg-PC2_pos-PC3_neg-PC4_neg-PC5_neg	TTT	-0.181893	0.121023	-0.0865589	-0.046462	-0.0876652	Phe	3	0	0	0
PC1_neg-PC2_pos-PC3_neg-PC4_neg-PC5_neg	GCA	-0.171067	0.0543446	-0.189189	-0.0566345	-0.072183	Ala	0	1	1	1
PC1_neg-PC2_pos-PC3_neg-PC4_neg-PC5_neg	TAT	-0.192394	0.0443589	-0.144735	-0.0758862	-0.100334	Tyr	2	0	1	0
PC1_neg-PC2_pos-PC3_neg-PC4_neg-PC5_neg	AAT	-0.191825	0.0922486	-0.105732	-0.0228184	-0.185316	Asn	1	0	2	0
PC1_neg-PC2_pos-PC3_neg-PC4_neg-PC5_pos	ACA	-0.065758	0.0119634	-0.0711742	-0.186817	0.423947	Thr	0	1	2	0
PC1_neg-PC2_pos-PC3_neg-PC4_neg-PC5_pos	GTA	-0.153329	0.0967162	-0.0474281	-0.11659	0.0174966	Val	1	0	1	1
PC1_neg-PC2_pos-PC3_neg-PC4_neg-PC5_pos	CCA	-0.108847	0.0371124	-0.175444	-0.0974211	0.266007	Pro	0	2	1	0
PC1_neg-PC2_pos-PC3_neg-PC4_pos-PC5_pos	TTA	-0.150816	0.0306638	-0.0905398	0.107791	0.0287879	Leu	2	0	1	0
PC1_neg-PC2_pos-PC3_pos-PC4_neg-PC5_neg	CGT	-0.0101908	0.0715671	0.180619	-0.0856955	-0.27426	Arg	1	1	0	1
PC1_neg-PC2_pos-PC3_pos-PC4_neg-PC5_neg	ATT	-0.156772	0.0497825	0.137811	-0.00626154	-0.138589	Ile	2	0	1	0
PC1_neg-PC2_pos-PC3_pos-PC4_neg-PC5_pos	TGT	-0.0135613	0.18909	0.112388	-0.0182505	0.0633831	Cys	2	0	0	1
PC1_neg-PC2_pos-PC3_pos-PC4_neg-PC5_pos	GTT	-0.0860847	0.0377802	0.254273	-0.0725839	0.121016	Val	2	0	0	1
PC1_neg-PC2_pos-PC3_pos-PC4_pos-PC5_neg	GAT	-0.217173	0.0470109	0.0250618	0.0306232	-0.0792192	Asp	1	0	1	1
PC1_neg-PC2_pos-PC3_pos-PC4_pos-PC5_neg	CAT	-0.0874968	0.190384	0.124829	0.0757413	-0.183633	His	1	1	1	0
PC1_neg-PC2_pos-PC3_pos-PC4_pos-PC5_neg	AGT	-0.150689	0.018351	0.0578959	0.00725076	-0.0393527	Ser	1	0	1	1
PC1_neg-PC2_pos-PC3_pos-PC4_pos-PC5_neg	ACT	-0.0235778	0.139598	0.254364	0.031809	-0.00101419	Thr	1	1	1	0
PC1_neg-PC2_pos-PC3_pos-PC4_pos-PC5_pos	TTG	-0.0697885	0.218493	0.0980953	0.0623603	0.0552837	Leu	2	0	0	1
PC1_pos-PC2_neg-PC3_neg-PC4_neg-PC5_neg	CGG	0.150045	-0.0234888	-0.165164	-0.0756264	-0.0866018	Arg	0	1	0	2
PC1_pos-PC2_neg-PC3_neg-PC4_neg-PC5_neg	CTG	0.166734	-0.0167342	-0.0897192	-0.250378	-0.00500853	Leu	1	1	0	1
PC1_pos-PC2_neg-PC3_neg-PC4_neg-PC5_pos	CAC	0.0874968	-0.190384	-0.124829	-0.0757413	0.183633	His	0	2	1	0
PC1_pos-PC2_neg-PC3_neg-PC4_neg-PC5_pos	GAC	0.217173	-0.0470109	-0.0250618	-0.0306232	0.0792192	Asp	0	1	1	1
PC1_pos-PC2_neg-PC3_neg-PC4_pos-PC5_neg	TGC	0.0135613	-0.18909	-0.112388	0.0182505	-0.0633831	Cys	1	1	0	1
PC1_pos-PC2_neg-PC3_neg-PC4_pos-PC5_neg	ACC	0.0865324	-0.085233	-0.219315	0.0992353	-0.247527	Thr	0	2	1	0
PC1_pos-PC2_neg-PC3_neg-PC4_pos-PC5_pos	GCG	0.0249547	-0.00509631	-0.114436	0.33409	0.205497	Ala	0	1	0	2
PC1_pos-PC2_neg-PC3_neg-PC4_pos-PC5_pos	AGC	0.0502768	-0.173119	-0.0055355	0.264759	0.0547235	Ser	0	1	1	1
PC1_pos-PC2_neg-PC3_pos-PC4_neg-PC5_neg	GTC	0.0847019	-0.21186	0.0639359	-0.0601285	-0.00532521	Val	1	1	0	1
PC1_pos-PC2_neg-PC3_pos-PC4_pos-PC5_neg	ATC	0.2124	-0.0247457	0.0248465	0.063749	-0.0694201	Ile	1	1	1	0
PC1_pos-PC2_neg-PC3_pos-PC4_pos-PC5_neg	CTC	0.0834099	-0.0296939	0.107819	0.222329	-0.108572	Leu	1	2	0	0
PC1_pos-PC2_neg-PC3_pos-PC4_pos-PC5_pos	TAC	0.192394	-0.0443589	0.144735	0.0758862	0.100334	Tyr	1	1	1	0
PC1_pos-PC2_neg-PC3_pos-PC4_pos-PC5_pos	AAC	0.191825	-0.0922486	0.105732	0.0228184	0.185316	Asn	0	1	2	0
PC1_pos-PC2_neg-PC3_pos-PC4_pos-PC5_pos	TTC	0.181893	-0.121023	0.0865589	0.046462	0.0876652	Phe	2	1	0	0
PC1_pos-PC2_pos-PC3_neg-PC4_neg-PC5_neg	TCC	0.094491	0.0158552	-0.221038	-0.195197	-0.0939939	Ser	1	2	0	0
PC1_pos-PC2_pos-PC3_neg-PC4_neg-PC5_neg	GAG	0.217682	0.000292073	-0.092312	-0.0858208	-0.00650391	Glu	0	0	1	2
PC1_pos-PC2_pos-PC3_neg-PC4_neg-PC5_neg	CAG	0.149493	0.184079	-0.0176515	-0.0283197	-0.0624494	Gln	0	1	1	1
PC1_pos-PC2_pos-PC3_neg-PC4_neg-PC5_pos	AGG	0.009686	0.0490491	-0.0929133	-0.331697	0.0651036	Arg	0	0	1	2
PC1_pos-PC2_pos-PC3_neg-PC4_pos-PC5_neg	CGC	0.128864	0.101797	-0.0422266	0.205912	-0.0695648	Arg	0	2	0	1
PC1_pos-PC2_pos-PC3_neg-PC4_pos-PC5_neg	GCC	0.16103	0.170184	-0.0505404	0.0832815	-0.00664701	Ala	0	2	0	1
PC1_pos-PC2_pos-PC3_neg-PC4_pos-PC5_neg	GTG	0.120915	0.0325737	-0.215025	0.172706	-0.107343	Val	1	0	0	2
PC1_pos-PC2_pos-PC3_neg-PC4_pos-PC5_pos	GGG	0.0335713	0.213678	-0.158254	0.0033031	0.11591	Gly	0	0	0	3
PC1_pos-PC2_pos-PC3_neg-PC4_pos-PC5_pos	GGC	0.048146	0.225084	-0.121231	0.0919255	0.0952693	Gly	0	1	0	2
PC1_pos-PC2_pos-PC3_neg-PC4_pos-PC5_pos	CCG	0.00140506	0.131696	-0.0679348	0.278096	0.223361	Pro	0	2	0	1
PC1_pos-PC2_pos-PC3_pos-PC4_neg-PC5_neg	AAG	0.198238	0.0973286	0.0343235	-0.128628	-0.0855498	Lys	0	0	2	1
PC1_pos-PC2_pos-PC3_pos-PC4_neg-PC5_pos	TCT	0.0702042	0.158145	0.23009	-0.0407775	0.0372342	Ser	2	1	0	0
PC1_pos-PC2_pos-PC3_pos-PC4_pos-PC5_neg	CCC	0.0462406	0.244934	0.05418	0.0152293	-0.119346	Pro	0	3	0	0
