# Supplementary material for: Uncovering codon usage patterns during murine embryogenesis and tissue-specific developmental diseases
Source: Front Genet. 2025 May 26;16:1554773. doi: 10.3389/fgene.2025.1554773 (PMC12146342; doi:10.3389/fgene.2025.1554773)
Supplement: Supplementary file 7 [file Table1.xlsx]

## Sheet: Tissue-specific genes
Healthy Liver (3111)	Diseased Liver (600)	Healthy Heart (3152)	Diseased Heart (700)	Healthy Eye (4772)	Diseased Eye (918)		Table S1: Associated Healthy and Diseased Tissue-Specific Genes.
2310061I04Rik	Abca1	1600012H06Rik	Abcc8	0610010K14Rik	Abca3
2410004B18Rik	Abcb4	1700012B09Rik	Abcc9	1110065P20Rik	Abcb1a
2510002D24Rik	Abcd3	1700086L19Rik	Abcd3	1190005I06Rik	Abcd3
2810459M11Rik	Abcg2	2310061I04Rik	Abcg2	1700012B09Rik	Abhd5
A2m	Acad9	2510002D24Rik	Acad9	1700025G04Rik	Acad9
Aadac	Acadl	4921524J17Rik	Acadl	1700086L19Rik	Acadm
Aadat	Acadm	4930447C04Rik	Acadm	1810009A15Rik	Acbd5
Aard	Acadvl	4930555G01Rik	Acadvl	1810037I17Rik	Acox1
Aars1	Acox1	4932438H23Rik	Ace2	2310022B05Rik	Acsbg1
Aass	Adam17	6330403K07Rik	Acox1	2310057M21Rik	Acta1
Aatf	Adamts1	Aadac	Acta1	2410002F23Rik	Acvr1
Abat	Adamtsl2	Aard	Actn4	2410004B18Rik	Acvr2a
Abca1	Adar	Aass	Acvr1	2510009E07Rik	Acvr2b
Abca7	Adcy3	Abcc5	Acvr2a	2610042L04Rik	Acvrl1
Abca8b	Adcy5	Abcc8	Acvr2b	2900026A02Rik	Adamts1
Abcb4	Add2	Abcc9	Adam17	4833439L19Rik	Adamts10
Abcb6	Adh7	Abcd3	Adamts1	4930447C04Rik	Adamts17
Abcb7	Adk	Abcf1	Adamts10	4930555G01Rik	Adamts19
Abcb8	Agpat2	Abcf2	Adamts19	4931406C07Rik	Adamtsl2
Abcb10	Ahr	Abcg1	Adamtsl2	4932438H23Rik	Adar
Abcb11	Aire	Abcg2	Adar	5031439G07Rik	Adarb1
Abcc3	Akt1	Abi3	Adarb1	6330403K07Rik	Adcy3
Abcd2	Akt2	Abl1	Adcy3	9330159F19Rik	Adcy5
Abcd3	Aldh1a2	Ablim1	Adcy5	A2m	Add2
Abcf1	Aldh7a1	Ablim3	Add2	Aacs	Adgrv1
Abcf2	Alpl	Abra	Adgrg6	Aadac	Adh7
Abcg1	Amacr	Abracl	Adk	Aak1	Adk
Abcg2	Ank1	Acaa2	Aff3	Aamdc	Adora2a
Abcg4	Anks6	Acad8	Agl	Abat	Aff3
Abi2	Apaf1	Acad9	Agrn	Abca2	Agl
Abl2	Apob	Acadl	Ahr	Abca3	Agrn
Abr	App	Acadm	Aire	Abca13	Agtpbp1
Abracl	Aprt	Acadsb	Akt1	Abcb1a	Ahr
Abtb1	Arg1	Acadvl	Aldh1a2	Abcb6	Aire
Acaa1a	Asb4	Acat2	Aldh7a1	Abcb7	Akt1
Acaa2	Asl	Acd	Alpl	Abcc4	Akt2
Acaca	Aspa	Ace	Ank1	Abcc5	Aldh1a2
Acad8	Aspm	Ace2	Ank2	Abcd2	Aldh7a1
Acad9	Ass1	Acer2	Ano5	Abcd3	Alms1
Acadl	Atm	Ache	Apaf1	Abcf1	Alx4
Acadm	Atp6v1b1	Ackr3	Apba2	Abcf2	Amelx
Acadsb	Atp6v1b2	Ackr4	Apela	Abcg1	Amer1
Acadvl	Atp7a	Acly	App	Abcg4	Ank2
Acat1	Atp7b	Aco1	Ar	Abhd2	Ankfy1
Acat2	Atp8a2	Aco2	Arhgdia	Abhd4	Ankrd11
Acat3	Atp8b1	Acot2	Arid1a	Abhd5	Ap3d1
Acbd4	Atrx	Acox1	Arid1b	Abhd14a	Apba2
Acd	Atxn1	Acox2	Arx	Abi2	Apc
Ache	Atxn7	Acp1	Asb4	Abl1	App
Ackr1	Avp	Acsl1	Ass1	Ablim3	Aprt
Ackr3	Axin2	Acsl3	Asxl1	Abr	Arg1
Acly	B2m	Acsl4	Atf6	Abracl	Arhgef10
Aco1	B4galt1	Acsl5	Atp1a2	Abtb1	Arid1a
Aco2	Bace1	Acta1	Atp1a3	Abtb2	Arid1b
Acot1	Bcat2	Acta2	Atp2a2	Acaa1a	Arsg
Acot2	Bcl2	Actc1	Atxn7	Acaa2	Arx
Acot3	Bcor	Actn2	Auts2	Acaca	Asah1
Acot4	Bcs1l	Actn4	Avp	Acad8	Asl
Acot7	Blm	Actr10	Avpr2	Acad9	Aspa
Acot12	Bmp4	Acvr1	Axin2	Acadm	Ass1
Acox1	Bmpr1a	Acvr2a	B9d1	Acadsb	Atcay
Acox2	Bmpr2	Acvr2b	Baz1b	Acat2	Atf2
Acp1	Brca1	Adam10	Bcat2	Acat3	Atf6
Acp5	Btbd9	Adam11	Bcl2	Acbd5	Atg5
Acsl1	Btk	Adam15	Bcs1l	Ache	Atg7
Acsl3	Bub1b	Adam17	Bmp4	Acin1	Atg16l1
Acsl4	C3	Adam19	Bmp5	Ackr1	Atm
Acsl5	C4b	Adamts1	Bmp7	Ackr2	Atp1a2
Acss1	Car2	Adamts4	Bmp10	Ackr4	Atp1a3
Acss2	Casp3	Adamts5	Bmpr1a	Acly	Atp6v1b1
Acta2	Casz1	Adamts9	Bmpr2	Aco1	Atp6v1b2
Actc1	Cat	Adamts10	Brca1	Aco2	Atp8a2
Actl6a	Cbs	Adamts15	Brca2	Acot1	Atp13a2
Actrt2	Cby1	Adamts19	Brpf1	Acot2	Atr
Adam8	Ccm2	Adamtsl2	Bub1b	Acot7	Atrip
Adam10	Ccn1	Adap2	Cacna1a	Acox1	Atxn2
Adam17	Ccr1	Adar	Cacna1c	Acp1	Atxn7
Adamts1	Ccr2	Adarb1	Cacna1g	Acsbg1	Auts2
Adamts16	Ccr5	Adarb2	Cacna1s	Acsl1	Avp
Adamtsl2	Cd2ap	Adat1	Cacna2d2	Acsl3	Avpr1a
Adamtsl5	Cd38	Adcy1	Camk2a	Acsl4	Avpr2
Adar	Cdc42	Adcy2	Cap2	Acsl6	Axin2
Adat1	Cdh2	Adcy3	Car2	Acss2	B3glct
Adcy3	Cdh5	Adcy4	Car8	Acta1	Baz1b
Adcy4	Cdk4	Adcy5	Casp3	Acta2	Bbs4
Adcy5	Cdkn1a	Adcy6	Casp8	Actc1	Bcat2
Adcy6	Cdkn1c	Adcy8	Casq2	Actl6a	Bcl2
Adcy7	Cebpa	Adcy9	Casz1	Actl6b	Bcor
Adcy9	Cebpb	Adcyap1r1	Cat	Actr10	Bcs1l
Add2	Cenpf	Add2	Cav1	Acvr1	Becn1
Adgra3	Chkb	Adgra2	Cav3	Acvr1b	Bicc1
Adgre1	Chrd	Adgra3	Cbs	Acvr2a	Bmal1
Adgrg1	Cited2	Adgre1	Cby1	Acvr2b	Bmp4
Adh1	Clcn2	Adgrf5	Cc2d2a	Acvrl1	Bmp7
Adh5	Clcn3	Adgrg6	Ccdc39	Adam10	Bmpr1a
Adh7	Cldn14	Adgrl2	Ccl2	Adam11	Bmpr2
Adi1	Clp1	Adgrl4	Ccm2	Adam23	Brd4
Adipor1	Cmas	Adh5	Ccn1	Adamts1	Brpf1
Adipor2	Coasy	Adipor1	Cd2ap	Adamts5	Bsn
Adk	Col1a1	Adipor2	Cd38	Adamts9	Btbd9
Adm	Col4a1	Adk	Cdc14a	Adamts10	Bub1b
Adra2a	Col6a1	Adm	Cdc42	Adamts15	C1qtnf5
Adra2b	Col6a3	Adora1	Cdh2	Adamts16	Cacna1s
Adrb2	Col11a1	Adora3	Cdh5	Adamts17	Cacng8
Adsl	Col18a1	Adrb1	Cdk4	Adamts18	Capn3
Adss1	Comt	Adrb2	Cdk13	Adamts19	Car2
Adss2	Copb2	Adss1	Cdkn1a	Adamtsl2	Casp3
Aff1	Coro1a	Aebp1	Cdkn1c	Adamtsl5	Casq2
Aff4	Cox6a1	Afap1l1	Cdon	Adar	Casr
Afm	Cpox	Aff1	Cebpb	Adarb1	Casz1
Afp	Cps1	Aff2	Cenpf	Adarb2	Cat
Agfg2	Cpt1a	Aff3	Cfh	Adat1	Cavin1
Ago1	Crb1	Aff4	Chat	Adcy1	Cbs
Ago2	Crebbp	Agl	Chd2	Adcy2	Ccl2
Ago3	Crkl	Agpat3	Chd7	Adcy3	Ccn1
Ago4	Cryaa	Agrn	Chkb	Adcy5	Ccr5
Agpat2	Csf1	Agtr1a	Chrd	Adcy6	Ccr7
Agpat3	Csf2	Agtr2	Chrm3	Adcy8	Cd2ap
Agpat5	Csf2ra	Ahcy	Chrnb2	Adcy9	Cd38
Agt	Csf2rb	Ahnak	Cited2	Adcyap1	Cd86
Agtr1a	Csf3r	Ahr	Clcn1	Add2	Cd200
Agxt2	Csnk2a2	Ahsg	Clcn2	Adgra3	Cdc14a
Ahctf1	Cstb	Aifm3	Clcn3	Adgre1	Cdc73
Ahcy	Ctf1	Aimp1	Clcn5	Adgrg1	Cdh2
Ahcyl1	Cth	Aire	Clcn6	Adgrl1	Cdh5
Ahr	Ctnnb1	Ak1	Clcn7	Adgrv1	Cdk4
Ahsg	Ctse	Ak2	Cldn14	Adh1	Cdk5r1
Ahsp	Cx3cr1	Ak3	Cln3	Adh5	Cdk5rap2
Aimp1	Cxcr4	Ak4	Cmas	Adh7	Cdkn1a
Aip	Cybb	Akap8	Col1a1	Adipor1	Cdkn1c
Aire	Cys1	Akap13	Col1a2	Adipor2	Cdkn2a
Ak2	Daam1	Akr1a1	Col2a1	Adk	Cdon
Ak3	Dag1	Akr1d1	Col3a1	Adnp	Cebpa
Ak4	Dbt	Akt1	Col4a1	Adnp2	Cenpj
Akap8	Dcn	Akt3	Col5a1	Adora2a	Cerkl
Akr1a1	Des	Alcam	Col5a2	Adora2b	Chat
Akr1b1	Disc1	Aldh1a1	Col6a1	Adra2a	Chd2
Akr1c6	Dlx5	Aldh1a2	Col6a3	Adra2c	Chd7
Akr1c13	Dmd	Aldh4a1	Col8a2	Adrb2	Chkb
Akr1d1	Dmpk	Aldh7a1	Col9a1	Adrb3	Chrd
Akt1	Dnaaf2	Aldh18a1	Col11a1	Adsl	Chrm3
Akt2	Dnm2	Aldoa	Col13a1	Afdn	Chrna4
Alad	Dnmt3b	Aldob	Col18a1	Aff1	Chrna7
Alas1	Dph1	Aldoc	Comt	Aff3	Chrnb2
Alas2	Dpp4	Alg2	Coq8a	Aff4	Cic
Alb	Dvl2	Alk	Coq9	Agap1	Ciita
Albfm1	Dyrk1a	Alpk3	Coro1a	Agk	Cited2
Alcam	E2f1	Alpl	Cox6a1	Agl	Clcn1
Aldh1a1	E2f4	Ambp	Cox7a1	Ago1	Clcn2
Aldh1a2	E2f5	Ampd3	Cpe	Ago2	Clcn6
Aldh1a3	Ebp	Amz2	Crb1	Ago3	Clcn7
Aldh1a7	Ednrb	Angpt1	Crebbp	Agpat3	Cldn14
Aldh1b1	Efna5	Angpt2	Crkl	Agpat5	Clip2
Aldh1l1	Efnb1	Angptl1	Crtap	Agr2	Cln3
Aldh2	Egr1	Angptl2	Cryaa	Agrn	Cln5
Aldh3a2	Elk3	Angptl4	Cryab	Agtpbp1	Cln6
Aldh4a1	Eln	Ank1	Csf1	Agtr1a	Cmas
Aldh7a1	Elp2	Ank2	Csf2	Agtr2	Cntn1
Aldh8a1	Eml1	Ank3	Csrp3	Ahctf1	Cntnap2
Aldh18a1	Eng	Ankrd1	Cstb	Ahcy	Col1a1
Aldoa	Ep300	Ankrd17	Ctf1	Ahr	Col1a2
Aldob	Epas1	Ano1	Cth	Ahsg	Col2a1
Aldoc	Epb42	Ano5	Ctnna1	Aifm2	Col3a1
Alg2	Epcam	Anp32a	Ctnna2	Aimp1	Col4a1
Alg3	Ercc2	Anxa3	Ctnnb1	Aip	Col4a5
Alg8	Ercc3	Anxa5	Cxcr4	Aire	Col5a1
Alk	Erg	Anxa9	Cybb	Ajuba	Col6a1
Alkbh5	Esrrb	Anxa11	Dag1	Ak2	Col6a3
Alox5ap	Ezh2	Aoc3	Dbt	Ak3	Col9a1
Alox12	F9	Aopep	Dchs1	Ak4	Col17a1
Alox15	F11	Ap2b1	Dcn	Akap6	Col18a1
Alpl	F12	Ap2m1	Ddc	Akap8	Comt
Alx3	Fah	Apaf1	Des	Akap9	Cox6a1
Amacr	Fancc	Apba2	Dhh	Akap10	Cpe
Ambp	Fbxo11	Apbb1	Disc1	Akap11	Cplx2
Amd1	Fcgr2b	Apcdd1	Dlx5	Akap12	Cpt1a
Amd2	Fech	Apela	Dmd	Akap13	Crb1
Amfr	Fermt1	Apln	Dmpk	Akna	Crebbp
Ampd3	Fermt3	Aplnr	Dnah11	Akr1a1	Crh
Angpt1	Fgf9	Aplp2	Dock1	Akr1b1	Crkl
Angpt2	Fgf10	Apobec2	Dot1l	Akr1e1	Crx
Angptl3	Fgf13	Apobec3	Dph1	Akt1	Cryaa
Angptl4	Fgfr1	Apoe	Dpp4	Akt2	Cryab
Ank1	Fgfr2	Apold1	Drd2	Akt3	Cryba1
Ankrd13c	Fgfr3	App	Dsp	Alcam	Crybb2
Ankrd17	Fgfrl1	Aqp1	Dvl2	Aldh1a1	Cryga
Anks6	Fgg	Ar	Dync2h1	Aldh1a2	Crygb
Anp32a	Fhl1	Arf3	Dyrk1a	Aldh1a3	Crygc
Anp32e	Fli1	Arf6	E2f1	Aldh1l1	Crygd
Anpep	Flt3	Arg2	E2f4	Aldh6a1	Cryge
Anxa11	Flt4	Arhgap5	E2f5	Aldh7a1	Csnk2a2
Aoc3	Foxc1	Arhgap8	Ece1	Aldh9a1	Csrp3
Ap2a1	Foxf1	Arhgap11a	Ednra	Aldh18a1	Cstb
Ap2b1	Foxm1	Arhgap31	Ednrb	Aldoa	Ctnna1
Ap2m1	Foxo3	Arhgdia	Efna5	Aldoart2	Ctnna2
Apaf1	Fxn	Arhgef1	Efnb1	Aldoc	Ctnnb1
Apbb1ip	Fzd4	Arhgef3	Efnb3	Alg2	Ctsc
Apcs	Fzd9	Arhgef25	Eftud2	Alg3	Ctsd
Apeh	G6pc1	Arid1a	Egfr	Alk	Ctse
Apex1	Gabrd	Arid1b	Egr1	Alkbh8	Ctsl
Apoa1	Gad2	Arid3a	Elk3	Alms1	Cxcr4
Apoa2	Gadd45a	Arid5a	Eln	Alx3	Cyb5r4
Apoa4	Galnt1	Arl13b	Emp2	Alx4	Cyp1b1
Apob	Gars	Armh3	En1	Alyref	Cyp4v3
Apobec3	Gata1	Armh4	Eng	Alyref2	Cyp19a1
Apoc1	Gata3	Arnt	Enpp1	Amd1	Daam1
Apoc2	Gata4	Arrdc1	Ep300	Amd2	Dag1
Apoc4	Gba1	Art1	Epas1	Amelx	Dbt
Apoe	Gcgr	Art4	Epb42	Amer1	Dcn
Apof	Gch1	Art5	Epha2	Amer2	Dcx
Apoh	Gck	Arvcf	Ephb4	Amer3	Ddc
Apol8	Gclc	Arx	Erbb2	Amfr	Des
Apom	Gdf1	Asb2	Erg	Amz2	Dhcr7
Apoo	Gdi1	Asb4	Esrrb	Anapc2	Dhh
App	Gdnf	Ascl2	Evc	Anapc11	Dicer1
Aprt	Gfi1	Ash2l	Evc2	Anapc13	Dkc1
Aqp1	Ghr	Asph	Ext1	Angpt2	Dlg3
Aqp8	Gja1	Ass1	Ext2	Ank2	Dlg4
Arf3	Gjb1	Asxl1	Eya1	Ankef1	Dlgap4
Arf6	Gjb2	Asxl2	Eya4	Ankfy1	Dlx5
Arfgap2	Glb1	Asxl3	Ezh2	Ankrd10	Dlx6
Arg1	Gldc	Ate1	Fbln5	Ankrd11	Dmd
Arhgap5	Glrb	Atf1	Fbn1	Ankrd22	Dnmt3b
Arhgap11a	Gnai2	Atf3	Fbn2	Ankrd33	Dock7
Arhgap24	Gnmt	Atf4	Fbxo11	Ankrd33b	Dot1l
Arid5b	Gnpat	Atf6	Fech	Ankrd54	Drd2
Arl5a	Got2	Atf6b	Fgf8	Anks3	Drd3
Arl11	Gp1ba	Atf7ip	Fgf9	Ano1	Dsg2
Arnt	Gpc3	Atf7ip2	Fgf10	Ano3	Dsp
Arrb1	Gpi1	Atic	Fgf13	Ano6	Dvl2
Arrb2	Gpr12	Atmin	Fgf14	Ano8	Dync1h1
Arrdc3	Grb10	Atoh1	Fgfr1	Ano10	Dyrk1a
Art4	Grhpr	Atoh8	Fgfr2	Anp32a	E2f1
Asap2	Grn	Atp1a1	Fgfr3	Anp32e	E2f4
Asb4	Gstm1	Atp1a2	Fgfrl1	Anpep	E2f5
Ascl2	Gtf2i	Atp1a3	Fhl1	Aoc3	Ebf1
Asf1b	Gtf2ird1	Atp1b1	Flcn	Ap2b1	Ece1
Asl	Gucy1a1	Atp1b3	Fli1	Ap2m1	Ecel1
Asns	Gusb	Atp2a2	Flna	Ap3b2	Eda
Aspa	Hand1	Atp2b1	Flnb	Ap3d1	Edar
Aspm	Hbb-b1	Atp2b2	Flnc	Ap3m2	Ednra
Ass1	Hdac3	Atp2b3	Flt4	Ap4e1	Ednrb
Atad5	Hdc	Atp2b4	Foxc1	Apba2	Eef1a2
Atf4	Hesx1	Atp5f1a	Foxe1	Apbb1	Efna5
Atf5	Hey2	Atp5f1b	Foxe3	Apbb2	Efnb1
Atf6b	Hgd	Atp5f1c	Foxf1	Apc	Efnb3
Atf7ip	Hgf	Atp5f1d	Foxh1	Apc2	Eftud2
Atf7ip2	Hif1a	Atp5mc2	Foxi1	Apex1	Egfr
Atic	Hivep2	Atp5mc3	Foxj1	Aph1a	Egr1
Atl2	Hk2	Atp5mg	Foxm1	Aplp1	Eif2ak3
Atm	Hmbs	Atp5pb	Frmd7	Apobec3	Eif2b4
Atmin	Hmga1	Atp5pd	Fst	Apod	Eif2b5
Atp1a1	Hmgcs2	Atp5pf	Fstl1	Apoe	Elk3
Atp1b2	Hmox1	Atp5po	Fuca1	App	Eln
Atp1b3	Hnf1a	Atp6v0a1	Fxn	Appl2	Elovl4
Atp2b1	Hnf4a	Atp6v0e	Fzd4	Aprt	Elp2
Atp2b2	Hoxb8	Atp6v1a	Gaa	Aqp1	Emg1
Atp2b4	Hpd	Atxn3	Gad2	Araf	En1
Atp5f1a	Hprt1	Atxn7	Gadd45a	Arc	En2
Atp5f1b	Hras	Aurkb	Galnt1	Arf3	Enpp1
Atp5f1c	Hsd11b1	Auts2	Galnt3	Arf4	Ep300
Atp5f1d	Hsd17b4	Avp	Gars	Arfgap2	Epb41
Atp5if1	Hsp90b1	Avpr2	Gata1	Arfgef3	Epcam
Atp5mc1	Hspb8	Axin1	Gata3	Arg1	Ephb4
Atp5mc2	Hspg2	Axin2	Gata4	Arg2	Erbb2
Atp5mc3	Htt	AY074887	Gata5	Arhgap5	Ercc2
Atp5me	Id3	B3galnt1	Gba1	Arhgap11a	Ercc3
Atp5mf	Id4	B3galt5	Gch1	Arhgap12	Ercc5
Atp5pb	Idh2	B4galt5	Gck	Arhgap21	Erg
Atp5pd	Ifng	B9d1	Gclc	Arhgap23	Esrrb
Atp5pf	Ifngr1	Bace2	Gdf5	Arhgap27	Ext1
Atp5po	Ifngr2	Bach1	Gdi1	Arhgap31	Ext2
Atp6v0c	Ift88	Bag4	Gfap	Arhgap35	Eya1
Atp6v0e	Ighmbp2	Baiap2	Gja1	Arhgap36	Ezh2
Atp6v1b1	Igsf1	Bak1	Gja5	Arhgap44	Fah
Atp6v1b2	Ihh	Bambi	Gna11	Arhgef7	Fam161a
Atp6v1c1	Ikzf3	Barhl1	Gnai2	Arhgef10	Fat1
Atp6v1e1	Il1r1	Barx2	Gnao1	Arhgef25	Fbn1
Atp6v1f	Il2	Bax	Gnas	Arid1a	Fbn2
Atp7a	Il2rg	Baz1b	Got2	Arid1b	Fem1b
Atp7b	Il4	Bbx	Gpi1	Arid3a	Fgd4
Atp8a1	Il4ra	Bcas3	Gpnmb	Arid3b	Fgf8
Atp8a2	Il6st	Bcat2	Grb10	Arid5a	Fgf9
Atp8b1	Il10	Bckdha	Grhl3	Arid5b	Fgf10
Atp9a	Inpp5d	Bckdhb	Gria1	Arl4c	Fgf13
Atp9b	Insr	Bcl2	Grin1	Arl6ip1	Fgf14
Atrx	Iqgap2	Bcl2a1a	Gtf2i	Arl8a	Fgfr1
Atxn1	Itga2b	Bcl2l1	Gtf2ird1	Arl8b	Fgfr2
Atxn7	Itga7	Bcl2l10	Gucy1a1	Arnt	Fgfr3
Aunip	Itgb1	Bcl10	Gusb	Arnt2	Fgfrl1
Aurka	Itgb2	Bco1	Gyg1	Arpc1b	Fhl1
Aurkaip1	Itgb3	Bcs1l	Hand1	Arpc2	Fktn
Aurkb	Jag1	Bdnf	Hapln1	Arpp21	Flcn
Avp	Jak2	Bfar	Hbb-b1	Arr3	Flg
Axin2	Jun	Bgn	Hcn1	Arrb1	Fli1
Axl	Junb	Bhlhe22	Hdac3	Arrb2	Flnc
AY074887	Kat6a	Bhlhe41	Hdc	Arrdc3	Flt4
B2m	Kcnq1	Bicral	Hepacam	Arsg	Fmr1
B3galnt1	Kdm6a	Bid	Hey2	Arsi	Foxc1
B4galnt1	Kif3b	Bin1	Hgd	Art1	Foxe3
B4galt1	Kit	Birc5	Hgf	Art4	Foxf1
B4galt3	Klf1	Bmi1	Hif1a	Art5	Foxg1
B4galt6	Klf15	Bmp1	Hivep2	Arvcf	Foxi1
Bace1	Kmt2a	Bmp2	Hk2	Arx	Foxj1
Bace2	Kras	Bmp3	Hmgcs2	Arxes1	Foxl2
Bach1	Krit1	Bmp4	Hnf4a	Arxes2	Foxm1
Bach2	Krt18	Bmp5	Hoxa1	Asah1	Foxn1
Bambi	L2hgdh	Bmp6	Hoxa3	Asb5	Foxo3
Bax	Lamb2	Bmp7	Hprt1	Ascl1	Foxp3
Bbc3	Lamb3	Bmp10	Hras	Asf1b	Fras1
Bbox1	Lat	Bmper	Hsd11b1	Asl	Frem1
BC061237	Lcat	Bmpr1a	Hsf2bp	Asns	Frem2
Bcap29	Ldb1	Bmpr1b	Hspb8	Aspa	Frem3
Bcar1	Ldb3	Bmpr2	Hspg2	Asph	Fst
Bcat1	Lemd2	Bmx	Htr2c	Aspn	Fstl1
Bcat2	Lepr	Bnc1	Htt	Ass1	Fus
Bche	Lgals3	Bnip3	Id3	Astn1	Fxn
Bckdhb	Lifr	Bnip3l	Idh2	Atat1	Fzd4
Bcl2	Lipa	Borcs5	Ifngr2	Atcay	Fzd9
Bcl2a1a	Litaf	Bphl	Ift74	Ate1	Gaa
Bcl2l1	Lmna	Brca1	Ift88	Atf2	Gabra1
Bcl2l10	Lpin1	Brca2	Ift140	Atf3	Gabrb3
Bcl6	Lpl	Brd8	Ift172	Atf4	Gabrd
Bcl9l	Lrat	Brk1	Ighmbp2	Atf5	Gabrg1
Bcl11a	Lrp1	Brpf1	Ikbkb	Atf6	Gabrg2
Bco1	Lrp4	Brwd1	Ilk	Atf6b	Gad2
Bco2	Lrp5	Bsg	Insr	Atf7	Gadd45a
Bcor	Lrp6	Btf3l4	Invs	Atf7ip	Galns
Bcs1l	Lrrk1	Btg3	Iqgap2	Atg3	Galnt1
Bdh1	Lss	Btn1a1	Itga6	Atg4b	Gas2
Bdh2	Ltbp3	Bub1	Itga7	Atg4c	Gata3
Bdp1	Ly6a	Bub1b	Itgb1	Atg4d	Gba1
Bex1	Lyn	Bves	Itgb2	Atg5	Gbe1
Bex2	Macroh2a1	C1qtnf1	Itgb3	Atg7	Gch1
Bex3	Mafa	C2cd2	Itgb4	Atg12	Gck
Bex4	Mafb	C2cd3	Jag1	Atg16l1	Gcm2
Bhlhe41	Magel2	Cabin1	Jun	Atic	Gdi1
Bhmt	Man2b1	Cacna1a	Jup	Atm	Gdnf
Bhmt2	Manba	Cacna1b	Kcna1	Atmin	Gfap
Bid	Map2k1	Cacna1c	Kcnab2	Atoh7	Gfi1
Bin2	Map2k7	Cacna1d	Kcne1	Atoh8	Ghr
Birc5	Mapk1	Cacna1e	Kcnh2	Atp1a1	Gja1
Blm	Mbd5	Cacna1g	Kcnh6	Atp1a2	Gja3
Blvrb	Mboat7	Cacna1h	Kcnj1	Atp1a3	Gja8
Bmp4	Mdk	Cacna1s	Kcnj8	Atp1b1	Gjb2
Bmp6	Mecom	Cacna2d1	Kcnj10	Atp1b3	Gldc
Bmpr1a	Mecp2	Cacna2d2	Kcnq1	Atp2b1	Gli3
Bmpr1b	Med1	Cacna2d3	Kdm6a	Atp2b2	Glis2
Bmpr2	Mest	Cacnb1	Kif1b	Atp2b3	Glis3
Bnip3l	Met	Cacnb2	Kif3a	Atp5f1a	Glul
Bok	Mgat2	Cacnb3	Kif7	Atp5f1b	Glyr1
Bpgm	Mks1	Cacnb4	Kit	Atp5f1c	Gm2a
Brca1	Mlxipl	Cacng1	Kmt2d	Atp5f1d	Gmppa
Brd7	Mmachc	Cacng4	Kras	Atp5if1	Gnai2
Bri3bp	Mmp14	Cacng6	Krit1	Atp5mc2	Gnao1
Brwd1	Mmut	Cadm3	L1cam	Atp5mc3	Gnas
Bsg	Mnt	Calca	L2hgdh	Atp5mf	Gnpat
Btbd9	Mpl	Calcb	Lama2	Atp5mg	Gns
Btbd17	Mta2	Cald1	Lamp2	Atp5pb	Got2
Btf3	Mthfd1l	Calm1	Lca5	Atp5pd	Gp1bb
Btf3l4	Mthfr	Calm2	Lcat	Atp5pf	Gpi1
Btg2	Mtss1	Calm3	Ldb3	Atp5po	Gpnmb
Btg3	Myb	Calr	Lemd2	Atp6ap1	Gpr143
Btk	Mybl2	Calu	Lgr4	Atp6ap2	Gprasp2
Btnl10	Mybpc3	Camk2a	Lgr5	Atp6v0a1	Grb10
Btrc	Myc	Camk2d	Lhx3	Atp6v0c	Grhl3
Bub1	Myo7a	Camk2g	Limk1	Atp6v0e	Gria1
Bub1b	Myot	Cap2	Lmna	Atp6v0e2	Grin1
C1galt1	Nbn	Capn6	Lmo4	Atp6v1a	Grip1
C1qtnf12	Ncf1	Capzb	Lmod2	Atp6v1b1	Grm1
C1s1	Ncoa6	Car2	Lmod3	Atp6v1b2	Gstm1
C2	Ncor2	Car3	Lox	Atp6v1c1	Gtf2i
C2cd2	Ndn	Car4	Lpl	Atp6v1d	Gtf2ird1
C2cd3	Ndrg1	Car8	Lrp2	Atp6v1e1	Gucy1a1
C3	Ndst1	Car9	Lrp4	Atp6v1g1	Gusb
C4b	Ndufa1	Car10	Lrp5	Atp6v1h	Hap1
C8a	Nf1	Car11	Lrrc10	Atp8a1	Hcrt
C8g	Nf2	Car12	Lrrk1	Atp8a2	Hdac3
C9	Nfe2l1	Car15	Lss	Atp9a	Hepacam
C130073F10Rik	Nfix	Card6	Ltbp3	Atp13a2	Hesx1
Cacng4	Nfkbia	Carm1	Lum	Atr	Hexb
Cacybp	Nkx2-5	Cars1	Lztr1	Atrip	Hey2
Cad	Nme7	Casc3	Macroh2a1	Atxn2	Hgd
Cadm3	Nos1	Cask	Mafb	Atxn7	Hgf
Calm1	Notch2	Casp3	Magel2	Atxn7l3b	Hgsnat
Calm2	Notch3	Casp4	Man2b1	Atxn10	Hic1
Calm3	Nphs2	Casp6	Manba	Aurka	Hif1a
Calr	Npnt	Casp8	Map2k1	Aurkaip1	Hjv
Camk1d	Nr0b1	Casp9	Map2k7	Aurkb	Hk2
Camsap2	Nr1d2	Casq2	Map3k14	Auts2	Hmga1
Canx	Nr2f1	Casz1	Map3k20	Avl9	Hmox1
Capn1	Nr2f2	Cat	Mapk1	Avp	Hmx1
Car1	Nr3c1	Cav1	Matr3	Avpr1a	Hnrnpf
Car2	Nrg1	Cav3	Mbd5	Avpr1b	Hprt1
Car3	Nsd2	Cavin2	Mbnl1	Avpr2	Hr
Car9	Nsdhl	Cavin3	Mdk	Axin1	Hras
Car10	Ntf3	Cavin4	Mecom	Axin2	Hsd11b1
Car12	Ntrk1	Cbfb	Mecp2	Axl	Hsd17b4
Car15	Nupr1	Cbll1	Megf8	Azi2	Hsf2bp
Cars1	Oat	Cbr1	Men1	Azin2	Hsf4
Cartpt	Opa1	Cbr2	Mest	B3galnt1	Hspb8
Casp3	Optn	Cbr3	Met	B3galt2	Hspd1
Casp9	Ostm1	Cbs	Mgat2	B3galt5	Hspg2
Casz1	Otc	Cbx1	Mid1	B3gat1	Htr4
Cat	Pafah1b1	Cbx5	Mitf	B3gat3	Htt
Cbfa2t3	Pah	Cby1	Mkks	B3glct	Id3
Cbfb	Pak3	Cc2d2a	Mks1	B3gnt5	Id4
Cblc	Pank4	Ccbe1	Mlxipl	B4galnt1	Idh2
Cbr1	Parp1	Ccdc9b	Mmachc	B4galt2	Ids
Cbr3	Pbx1	Ccdc39	Mmp14	B4galt3	Ifngr2
Cbs	Pcca	Ccdc80	Mmut	B4galt6	Ift140
Cbx1	Pcnt	Ccdc117	Mrap	B4galt7	Ihh
Cby1	Pcsk5	Cck	Msrb3	Bace2	Ikzf4
Ccdc43	Pdcd10	Ccl2	Msx1	Bach1	Il33
Ccdc47	Pdgfra	Ccl7	Msx2	Bach2	Ilk
Ccdc126	Pdgfrb	Ccl8	Mthfd1l	Bahcc1	Impg2
Ccdc134	Pds5a	Ccl11	Mthfr	Bak1	Insl3
Ccl6	Pdx1	Ccm2	Mtss1	Bambi	Invs
Ccl9	Peg12	Ccm2l	Musk	Barhl2	Irf6
Ccl11	Pepd	Ccn1	Myb	Barx2	Irf8
Ccl20	Per2	Ccn2	Mybpc3	Bax	Itga6
Ccm2	Pfkm	Ccn4	Myc	Baz1b	Itgb1
Ccn1	Pgrmc1	Ccna2	Myh6	Baz2a	Itgb2
Ccn2	Phex	Ccnb1	Myh9	Baz2b	Itgb4
Ccna1	Phf6	Ccnd1	Myocd	Bbox1	Itm2b
Ccna2	Phyh	Ccnd2	Myot	Bbs4	Itsn2
Ccnb1	Pik3r1	Ccnd3	Nbn	Bbs7	Jag1
Ccnd1	Pitx2	Ccnl2	Ncor2	Bbs9	Jak2
Ccnd2	Pkd1	Ccnt1	Ndn	BC005537	Jun
Ccnd3	Pkd2	Cct8	Ndufs4	BC031181	Junb
Ccndbp1	Pkhd1	Cd2ap	Nexn	Bcas2	Jup
Ccnf	Pklr	Cd9	Nf1	Bcat1	Kat6b
Ccnl2	Plod1	Cd27	Nf2	Bcat2	Kcne1
Ccr1	Plp1	Cd34	Nfe2l1	Bckdha	Kcnh2
Ccr2	Pmm2	Cd38	Nfil3	Bckdhb	Kcnh6
Ccr5	Pmp22	Cd44	Nfix	Bcl2	Kera
Cct8	Pnp	Cd68	Nhs	Bcl7a	Kif1a
Cd2ap	Pnpla1	Cd80	Nkx2-5	Bcl9	Kif1b
Cd5l	Polr3h	Cd81	Nkx3-1	Bcl9l	Kit
Cd19	Ppil1	Cd96	Nme7	Bcl10	Klhl40
Cd34	Ppox	Cd99l2	Nog	Bclaf1	Kmt2a
Cd38	Ppp1r3c	Cd248	Nos3	Bclaf3	Kmt2d
Cd44	Ppt1	Cda	Notch2	Bco1	Kras
Cd47	Prdm16	Cdc14a	Notch3	Bcor	Krit1
Cd48	Prkar1a	Cdc25a	Nphp3	Bcs1l	Krt2
Cd55b	Prkci	Cdc42	Npnt	Bdh1	Krt4
Cd59a	Prkcq	Cdc42ep4	Nppa	Bdkrb2	Krt5
Cd68	Prkdc	Cdc45	Npr2	Bdnf	Krt10
Cd79a	Prlr	Cdca7	Npr3	Bdp1	Krt13
Cd79b	Prnp	Cdh1	Nr0b1	Becn1	Krt14
Cd81	Prox1	Cdh2	Nr1d2	Begain	Krt16
Cd82	Prpf3	Cdh3	Nr1h4	Bex2	Krt18
Cd99l2	Prpf8	Cdh5	Nr2f1	Bfsp1	Krt71
Cd177	Prpf31	Cdh6	Nr2f2	Bfsp2	L1cam
Cd200r1	Psap	Cdh8	Nr3c1	Bhlhb9	Lama5
Cd248	Psmc4	Cdh10	Nr4a2	Bhlhe22	Lamp2
Cdc25a	Pten	Cdh11	Nr5a1	Bhlhe41	Lca5
Cdc25b	Ptgs1	Cdh13	Nrg1	Bicc1	Lcat
Cdc42	Ptprc	Cdh20	Nrp1	Bicd2	Ldb1
Cdc42ep4	Pygl	Cdhr1	Nrp2	Bicdl1	Ldb3
Cdc45	Qsox1	Cdk1	Nsd2	Bicral	Lepr
Cdca2	Rab27b	Cdk4	Nsdhl	Bin1	Lgi1
Cdca3	Rag1	Cdk5	Ntf3	Bin3	Lgr4
Cdca4	Rag2	Cdk6	Oat	Birc5	Lgr5
Cdca5	Rasa3	Cdk13	Opa1	Birc7	Lhx3
Cdca7	Recql4	Cdk14	Optn	Blk	Lifr
Cdca7l	Reep6	Cdkn1a	Pafah1b1	Bltp1	Limk1
Cdca8	Relb	Cdkn1b	Papss2	Bltp2	Litaf
Cdh1	Reln	Cdkn1c	Parp1	Bmal1	Lmna
Cdh2	Robo1	Cdo1	Pax3	Bmerb1	Lmo4
Cdh3	Runx2	Cdon	Pax6	Bmi1	Lmod3
Cdh5	Runx3	Ceacam1	Pax8	Bmp2	Lmx1b
Cdh6	Rxra	Cebpb	Pbx1	Bmp3	Lpl
Cdh11	Ryr2	Celf1	Pcnt	Bmp4	Lrfn2
Cdh13	Scarb2	Celf2	Pcsk1	Bmp6	Lrp4
Cdh17	Sdhb	Cemip2	Pcsk5	Bmp7	Lrp5
Cdh20	Sdhc	Cenpf	Pdcd10	Bmpr1a	Lrp6
Cdhr5	Sdhd	Cenpu	Pdgfra	Bmpr1b	Lrrtm1
Cdk1	Selenon	Cep20	Pdgfrb	Bmpr2	Lss
Cdk2	Serpina6	Cep164	Pdlim3	Bmx	Ltbp3
Cdk4	Serpinc1	Cerk	Pdss2	Bmyc	Lyn
Cdk5rap1	Serpinf1	Ces1d	Peg12	Bnip3l	Lztfl1
Cdk5rap3	Serpinf2	Ces2g	Per2	Bnip5	Lztr1
Cdk14	Setd1a	Cfap126	Pfkm	Boc	Macroh2a1
Cdk16	Sh2b3	Cfap298	Pgrmc1	Bpifa2	Madd
Cdk18	Sh3pxd2b	Cfap410	Phc1	Bptf	Maf
Cdkn1a	Shh	Cfdp1	Phka1	Brap	Mafa
Cdkn1b	Sipa1	Cfh	Phyh	Brd2	Mafb
Cdkn1c	Sirt1	Cfl1	Piga	Brd3	Man2b1
Cdkn2c	Sirt3	Cfl2	Pink1	Brd4	Maoa
Cdkn2d	Sirt6	Cflar	Pitx1	Brd7	Map2k1
Cdo1	Slc2a2	Cgnl1	Pitx2	Brdt	Map2k7
Cdr2	Slc2a4	Cgref1	Pkd1	Brme1	Map3k14
Cebpa	Slc4a1	Chaf1b	Pkd2	Brpf1	Map6
Cebpb	Slc6a4	Chat	Pklr	Brpf3	Mapk1
Cebpd	Slc6a5	Chchd2	Plau	Brsk2	Mapt
Cebpe	Slc6a9	Chchd10	Plcb1	Brwd1	Mast1
Cebpg	Slc7a8	Chd2	Plod1	Bsg	Mbd2
Cela2a	Slc17a5	Chd7	Plp1	Bsn	Mbnl1
Celf1	Slc20a2	Chdh	Plxnd1	Bspry	Mc3r
Cenpf	Slc24a5	Chkb	Pnp	Btbd8	Mcm9
Cenpo	Slc25a13	Chodl	Polr3h	Btbd9	Mdk
Cenpu	Slc26a7	Chrd	Pomt1	Btbd17	Mdm4
Cerk	Slc29a1	Chrm2	Postn	Btf3	Mecom
Cers2	Slc32a1	Chrm3	Ppara	Btf3l4	Mecp2
Ces1c	Slc35c1	Chrnb2	Ppargc1a	Btg1	Med1
Ces1d	Slc37a4	Chst2	Ppm1g	Btg2	Megf8
Ces1e	Slc39a4	Chst8	Ppox	Btg3	Mest
Ces2b	Slc39a8	Chst11	Ppp1r14c	Bub1	Met
Ces2e	Slc40a1	Chst15	Ppp3r1	Bub1b	Mgat2
Ces2g	Slit2	Chsy1	Ppt1	C1qtnf4	Mid1
Cetn3	Smad3	Chtop	Prdm1	C1qtnf5	Mip
Cfap298	Smad4	Cited1	Prdm16	C2cd2	Mitf
Cfap410	Smarca4	Cited2	Prickle1	C2cd2l	Mkks
Cfb	Smarcad1	Cited4	Prkar1a	C2cd3	Mkrn3
Cfp	Smarcb1	Ckb	Prkci	C5ar1	Mnt
Chaf1b	Smpd1	Ckm	Prmt1	C130073F10Rik	Mstn
Champ1	Smpx	Ckmt2	Prnp	Cab39	Msx1
Chchd3	Snca	Clca1	Prox1	Cab39l	Msx2
Chd1l	Snrpb	Clca3a1	Prpf3	Cables1	Mta2
Chek1	Sod1	Clca3a2	Prpf8	Cabp4	Mthfd1l
Chek2	Sod2	Clca3b	Prpf31	Cacna1b	Mthfr
Chil3	Sord	Clcn1	Psap	Cacna1s	Mtss1
Chkb	Sox9	Clcn2	Psen1	Cacnb2	Musk
Chmp2a	Sox17	Clcn3	Ptch1	Cacnb3	Myb
Chrd	Sp4	Clcn4	Pten	Cacng1	Mybl2
Chrm4	Spast	Clcn5	Ptger4	Cacng3	Mybpc1
Chrnb3	Spi1	Clcn6	Ptgs1	Cacng4	Myc
Chst11	Spred2	Clcn7	Pthlh	Cacng5	Myh6
Chst13	Spta1	Cldn5	Ptprc	Cacng6	Myh9
Chst14	Sptbn1	Cldn8	Pygm	Cacng7	Myo5a
Chsy1	Sptlc2	Cldn11	Qsox1	Cacng8	Myo7a
Ciao1	Src	Cldn14	Rab18	Cad	Myo9a
Ciao2a	Srgap3	Clec1a	Rab39b	Cadm1	Mypn
Ciapin1	Stim1	Clec2d	Rac2	Cadm3	Myt1l
Cisd1	Stk11	Clic1	Rassf5	Cadps	Nbea
Cish	Sucla2	Clint1	Rbm20	Calb1	Ncf1
Cited1	Sycp3	Clip1	Rbm24	Calb2	Ncoa6
Cited2	Syne1	Cln3	Rbpj	Calcb	Ncor2
Cited4	Tbc1d24	Clns1a	Relb	Calm1	Ndn
Ciz1	Tbp	Clstn2	Reln	Calm2	Ndp
Ckb	Tbx20	Clu	Rho	Calm3	Ndrg1
Clca3a1	Tcf4	Clvs1	Ripk4	Calu	Ndufa1
Clca3a2	Tfr2	Cmas	Rnf213	Camk1	Ndufs4
Clcf1	Tfrc	Cmklr1	Robo1	Camk1d	Nectin1
Clcn2	Tgfb1	Cmpk1	Ror2	Camk1g	Nefl
Clcn3	Tgfb2	Cmya5	Runx2	Camk2b	Neurod1
Cldn13	Tgfbr1	Cnga2	Runx3	Camk2d	Nexmif
Cldn14	Tgfbr2	Cnih1	Rxra	Camk2g	Nf2
Clec1b	Tgm2	Cnn1	Ryr2	Camk4	Nfil3
Clec2d	Thbs1	Cnn2	S1pr2	Camkk1	Nfix
Clec2e	Thra	Cnnm2	Sall1	Camkk2	Nfkbiz
Clec4f	Timd4	Cnot1	Sall4	Camsap1	Nhs
Clec12a	Timp3	Cnot6	Satb1	Camsap2	Nisch
Clint1	Tinf2	Cnot8	Sbf2	Camta1	Nlgn3
Clk1	Tlr7	Cnot9	Scgb1a1	Cap1	Nlrp3
Clp1	Tnf	Cnppd1	Scn1a	Capg	Nme7
Clpb	Tnfrsf1a	Coa5	Scn1b	Capn2	Nmnat1
Cltb	Tnfrsf1b	Col1a1	Scn2a	Capn3	Nog
Clu	Tnnc1	Col1a2	Scn3b	Caprin1	Notch2
Cluh	Tor1a	Col2a1	Scn4a	Caprin2	Notch3
Clybl	Tpi1	Col3a1	Scn5a	Car1	Npnt
Cmas	Traf6	Col4a1	Scn8a	Car2	Npr2
Cmklr1	Trappc10	Col4a6	Scn11a	Car10	Npr3
Cmpk1	Trf	Col5a1	Scnn1b	Car11	Nr0b1
Cmpk2	Trim37	Col5a2	Scnn1g	Car12	Nr1d2
Cnbp	Trp53	Col5a3	Sco1	Car14	Nr1h3
Cnih1	Trp53bp2	Col6a1	Sdhb	Car15	Nr1h4
Cnnm2	Trp73	Col6a2	Sdhc	Carm1	Nr2e3
Cnot1	Trpm3	Col6a3	Sdhd	Carns1	Nr2f1
Cnot3	Tsc1	Col8a1	Selenon	Cars1	Nr2f2
Cnot6	Ttpa	Col8a2	Senp1	Cartpt	Nr3c1
Cnot9	Ttr	Col9a1	Serpinf1	Cask	Nr5a1
Cntf	Tubb5	Col11a1	Serpinh1	Casp3	Nrcam
Cntfr	Txnip	Col12a1	Sgca	Casp6	Nrg1
Coasy	Ube3b	Col13a1	Sh3pxd2b	Casq2	Nrl
Col1a1	Ucp2	Col18a1	Shh	Casr	Nrp1
Col4a1	Uox	Col19a1	Shox2	Casz1	Nrp2
Col6a1	Uqcrfs1	Col23a1	Sim1	Cat	Nrxn1
Col6a2	Uros	Colec11	Sirt1	Cavin1	Nrxn2
Col6a3	Vangl1	Comt	Six2	Cavin2	Nsd1
Col6a4	Vdr	Copg1	Slc1a1	Cbfa2t2	Nsd2
Col11a1	Vegfc	Cops2	Slc2a4	Cbfa2t3	Nsdhl
Col18a1	Vhl	Coq2	Slc4a1	Cbfb	Nsmf
Colec10	Vldlr	Coq3	Slc6a1	Cblb	Ntf3
Comt	Vrk3	Coq4	Slc6a5	Cblc	Nupr1
Comtd1	Vwf	Coq5	Slc9a9	Cbln2	Oat
Cop1	Wasl	Coq6	Slc10a7	Cbln3	Oca2
Copb2	Wdfy3	Coq7	Slc17a5	Cbln4	Ofd1
Copg1	Wnt5a	Coq8a	Slc25a13	Cbr1	Opa1
Cops2	Wt1	Coq8b	Slc32a1	Cbr3	Opa3
Cops5	Wwtr1	Coq9	Slit2	Cbs	Ophn1
Cops6	Xbp1	Coq10a	Slit3	Cbx1	Oprm1
Cops8	Yap1	Coq10b	Smad3	Cbx3	Optn
Coq7	Yars1	Corin	Smad9	Cbx5	Pafah1b1
Coq10a	Ywhae	Coro1a	Smarca4	Ccar2	Pak3
Coro1a	Yy1	Coro1b	Smarcad1	Ccdc43	Pals1
Coro1b	Zap70	Coro6	Smarcb1	Ccdc47	Park7
Cox4i1	Zeb2	Cox4i1	Smn1	Ccdc88a	Parp1
Cox4i2	Zic3	Cox4i2	Smoc1	Ccdc91	Pax2
Cox5a		Cox5a	Smpd3	Ccdc141	Pax6
Cox5b		Cox5b	Smpx	Ccdc148	Pax8
Cox5b-ps		Cox5b-ps	Snai2	Ccdc163	Pbx1
Cox6a1		Cox6a1	Snap29	Ccdc184	Pcare
Cox6b1		Cox6a2	Sod1	Ccdc188	Pcdh15
Cox6c		Cox6b1	Sod2	Ccer1	Pclo
Cox7a2		Cox6c	Sox9	Ccl2	Pcnt
Cox7b		Cox7a1	Sox11	Ccl6	Pdcd1
Cox7c		Cox7a2	Sox17	Ccl12	Pde6b
Cox8a		Cox7b	Sp4	Ccn1	Pdgfra
Cpb2		Cox7c	Spast	Ccn2	Pdgfrb
Cpd		Cox8b	Spi1	Ccn3	Pds5a
Cpn1		Cpd	Spr	Ccna2	Pdx1
Cpox		Cpe	Spred2	Ccnb1	Peg12
Cps1		Cpeb4	Sptbn1	Ccnc	Per1
Cpt1a		Cpne5	Sptlc2	Ccnd1	Per2
Cpt2		Cpt1b	Sqstm1	Ccnd2	Pfkm
Cpxm1		Cpt1c	Srf	Ccnd3	Pgrmc1
Cpz		Cpt2	Srgap3	Ccne1	Phc1
Cr1l		Cpxm1	Stim1	Ccnk	Phf6
Crabp2		Cpz	Stk11	Ccnl2	Phox2a
Crat		Crabp1	Stx11	Ccnq	Pik3ca
Crb1		Crabp2	Sucla2	Ccnt1	Pik3r1
Creb3l3		Cracd	Sufu	Ccnt2	Pink1
Crebbp		Cradd	Sycp3	Ccpg1	Pitx1
Creg1		Crat	Tacr1	Ccr5	Pitx2
Crk		Crb1	Tardbp	Ccr6	Pitx3
Crkl		Creb3	Tbr1	Ccr7	Pkd1
Crlf1		Creb3l1	Tbx1	Ccr9	Pkd2
Crlf3		Crebbp	Tbx3	Ccrl2	Pklr
Crls1		Crim1	Tbx5	Ccser2	Plcb1
Cry2		Crip2	Tbx20	Cct8	Plec
Cryaa		Crk	Tbx22	Ccz1	Plod1
Cryzl1		Crkl	Tcap	Cd2ap	Pmfbp1
Cs		Crls1	Tcf4	Cd24a	Pmp22
Cse1l		Crtap	Tcf20	Cd38	Pnp
Csf1		Crtc2	Tfap2a	Cd44	Polb
Csf1r		Cry2	Tff1	Cd59a	Polr3h
Csf2		Cryaa	Tgfb1	Cd63	Pomt1
Csf2ra		Cryab	Tgfb2	Cd81	Porcn
Csf2rb		Crybg1	Tgfbi	Cd86	Pou4f3
Csf3		Cryzl1	Tgfbr1	Cd164	Pparg
Csf3r		Cs	Tgfbr2	Cd200	Ppargc1a
Csgalnact1		Csf1	Tgm2	Cd200r1	Ppil1
Csl		Csf1r	Thbd	Cd200r2	Ppip5k2
Csnk2a1		Csf2	Thbs1	Cd247	Ppp1r13l
Csnk2a2		Csl	Thra	Cd248	Ppp4c
Csnk2b		Csmd3	Thrb	Cda	Ppt1
Cspp1		Csnk1a1	Tinf2	Cdc7	Pqbp1
Csrp1		Csnk1d	Tlx3	Cdc14a	Prdm1
Csrp2		Csnk1g3	Tnf	Cdc40	Prdm16
Cstb		Csnk2a1	Tnfrsf1a	Cdc42ep1	Prickle1
Ctf1		Csnk2b	Tnfrsf1b	Cdc42ep4	Prkar1a
Cth		Cspp1	Tnnc1	Cdc73	Prkci
Ctla2a		Csrp1	Tnni2	Cdca2	Prkdc
Ctnnb1		Csrp2	Tnnt1	Cdca4	Prkn
Ctnnd1		Csrp3	Tnnt2	Cdca7	Prmt1
Ctps1		Cst3	Tor1a	Cdca7l	Prmt5
Ctps2		Cstb	Tpi1	Cdcp1	Prnp
Ctse		Ctbp2	Trappc10	Cdh1	Prom1
Ctsg		Ctf1	Trhr	Cdh2	Prox1
Ctsh		Cth	Trp53	Cdh3	Prpf3
Cttn		Cthrc1	Trp53bp2	Cdh4	Prpf8
Cttnbp2nl		Ctla2a	Trp53inp1	Cdh5	Prpf31
Cux1		Ctnna1	Trp63	Cdh6	Prss56
Cx3cr1		Ctnna2	Trps1	Cdh8	Psap
Cxadr		Ctnna3	Tsc1	Cdh10	Psen1
Cxcl1		Ctnnb1	Tsc2	Cdh11	Psme4
Cxcl2		Ctnnbip1	Ttn	Cdh13	Ptch1
Cxcl5		Ctnnd1	Tubb3	Cdh15	Pten
Cxcl10		Ctps1	Tubb4a	Cdh20	Ptger4
Cxcl12		Ctsa	Twist1	Cdhr1	Ptgs1
Cxcl15		Ctsh	Txnip	Cdin1	Pts
Cxcr2		Cux1	Uaca	Cdk1	Pygl
Cxcr4		Cxadr	Ube3b	Cdk2ap1	Pygm
Cyba		Cxcl2	Ucp2	Cdk4	Rab18
Cybb		Cxcl12	Uqcrfs1	Cdk5	Rab27b
Cyc1		Cxcr2	Vangl2	Cdk5r1	Rai1
Cycs		Cxcr4	Vegfa	Cdk5r2	Rapsn
Cyp1a2		Cxxc4	Vegfc	Cdk5rap2	Rasa3
Cyp2a5		Cybb	Vhl	Cdk5rap3	Rbm24
Cyp2c29		Cyc1	Vldlr	Cdk6	Rbpj
Cyp2c37		Cyp2c70	Vwf	Cdk14	Reep1
Cyp2c50		Cyp2f2	Was	Cdk17	Relb
Cyp2d9		Cyp3a11	Wdfy3	Cdkn1a	Reln
Cyp2d10		Cyp4f13	Wnk4	Cdkn1b	Ret
Cyp2r1		Cyp17a1	Wnt5a	Cdkn1c	Rfx3
Cyp3a11		Cyp26a1	Wt1	Cdkn2a	Rho
Cyp3a16		Cyp26b1	Wwtr1	Cdkn2b	Ripk4
Cyp4a10		Cyp39a1	Xbp1	Cdkn2c	Rlbp1
Cyp4a14		D16Ertd472e	Xirp1	Cdkn2d	Robo1
Cyp4f13		Dach1	Yap1	Cdo1	Rp2
Cyp7a1		Dact1	Ywhae	Cdon	Rpgr
Cyp26a1		Dag1	Yy1	Cdr2	Rpl5
Cyp51		Dap3	Zdhhc13	Cds1	Rps6ka3
Cys1		Dapk1	Zdhhc17	Cebpa	Rubcn
Daam1		Dapk3	Zeb2	Celf1	Runx2
Daam2		Dars1	Zfp106	Celf2	Runx3
Dact1		Dazap1	Zfp423	Celf3	Rxra
Dad1		Dbt	Zfpm2	Celf4	S1pr2
Dag1		Dchs1		Celf5	Sall1
Daglb		Dclk2		Celsr3	Sall4
Dap3		Dcn		Cemip2	Satb1
Dapp1		Dcp2		Cend1	Sbf1
Dars1		Dcps		Cenpj	Scamp5
Dars2		Dct		Cenpk	Scarb2
Dazap1		Dctn2		Cenpt	Scg5
Dazap2		Ddah1		Cenpu	Sclt1
Dbr1		Ddah2		Cenpw	Scn3b
Dbt		Ddc		Cep78	Sdhb
Dcaf8		Ddo		Cep120	Sdhc
Dck		Ddost		Cep164	Sdhd
Dcn		Ddx3x		Cep170b	Serpinf1
Dcp2		Ddx5		Cep295nl	Serpinh1
Dctd		Ddx52		Cer1	Serpini1
Dcun1d5		Ddx54		Cerk	Sf3b1
Ddb1		Degs1		Cerkl	Sh3pxd2b
Ddhd1		Dennd2b		Cert1	Sh3rf2
Ddit3		Des		Ces2g	Shh
Ddost		Desi2		Cetn3	Shox2
Ddrgk1		Dgcr2		Cfap20	Sim1
Ddx3x		Dgcr8		Cfap36	Sirt1
Ddx5		Dgkg		Cfap90	Sirt6
Deaf1		Dgkq		Cfap251	Six1
Degs1		Dglucy		Cfap298	Six2
Dek		Dhfr		Cfap410	Six3
Dennd2c		Dhh		Cfdp1	Slc1a1
Dennd4a		Dhrs3		Cfl2	Slc6a1
Des		Dhrs7		Cga	Slc6a2
Desi2		Dhx36		Cgrrf1	Slc6a5
Dgat1		Dio3		Chaf1b	Slc6a8
Dgat2		Dip2a		Chat	Slc6a9
Dgkq		Diras2		Chchd3	Slc7a8
Dgkz		Disc1		Chd2	Slc7a11
Dhcr24		Dkk1		Chd4	Slc7a14
Dhfr		Dkk2		Chd7	Slc12a5
Dhodh		Dkk3		Chdh	Slc17a5
Dhrs3		Dkk4		Chga	Slc24a1
Dhrs11		Dlat		Chgb	Slc25a12
Dio3		Dld		Chic1	Slc26a7
Dip2a		Dlg1		Chka	Slc27a4
Diras2		Dlk1		Chkb	Slc29a1
Disc1		Dll1		Chmp3	Slc32a1
Dixdc1		Dll4		Chodl	Slc39a4
Dkk1		Dlst		Chpt1	Slc45a2
Dkk2		Dlx1		Chrd	Slit2
Dkk3		Dlx2		Chrm1	Slit3
Dkk4		Dlx3		Chrm2	Slitrk1
Dlat		Dlx5		Chrm3	Slitrk6
Dld		Dmd		Chrm4	Slurp1
Dlgap5		Dmpk		Chrm5	Smad9
Dlk1		Dmrtc1a		Chrna3	Smarca4
Dlk2		Dmrtc2		Chrna4	Smarcad1
Dll1		Dmtf1l		Chrna6	Smarcb1
Dlst		Dnah11		Chrna7	Smn1
Dlx2		Dnajb5		Chrnb2	Smoc1
Dlx3		Dnajb9		Chrnb3	Smpd1
Dlx5		Dnal4		Chrnb4	Smpd3
Dmd		Dnm3		Chrng	Smpx
Dmpk		Dnmt3a		Chst1	Snai2
Dmrtc1a		Dnmt3l		Chst2	Snap25
Dmtn		Dock1		Chst14	Snap29
Dnaaf2		Dock6		Chst15	Snca
Dnaja4		Dok4		Ciao1	Snrpb
Dnajc12		Donson		Ciapin1	Snrpn
Dnajc16		Dop1b		Cic	Sod1
Dnajc22		Dot1l		Ciita	Sod2
Dnm2		Dpf1		Cimip1	Sos1
Dnmt1		Dpf2		Cimip2c	Sox7
Dnmt3a		Dpf3		Cirbp	Sox9
Dnmt3b		Dph1		Cish	Sox11
Dnmt3l		Dpp4		Cit	Sox17
Dolpp1		Dpysl3		Cited1	Sp4
Donson		Dpysl4		Cited2	Spast
Dpf2		Drd1		Cited4	Spata7
Dpf3		Drd2		Ckb	Specc1l
Dph1		Drgx		Ckm	Spi1
Dph2		Dscam		Ckmt1	Spr
Dpm1		Dsp		Cks1b	Spred2
Dpp4		Dstn		Clcn1	Spry2
Dpp8		Dtna		Clcn2	Sptlc2
Dppa2		Dtx1		Clcn6	Sqstm1
Dppa4		Dusp1		Clcn7	Src
Dpy30		Dusp5		Cldn1	Srgap3
Drg1		Dusp9		Cldn4	Srsf2
Dscam		Dusp10		Cldn5	Stat3
Dtd1		Dusp14		Cldn8	Stx1a
Dtna		Dusp16		Cldn14	Sucla2
Dtx2		Dvl2		Cldn17	Sufu
Dtymk		Dvl3		Clec11a	Syn1
Dusp1		Dync1i1		Clic6	Syn2
Dusp7		Dync2h1		Clip2	Tacr1
Dusp9		Dync2li1		Clk1	Tacr3
Dusp10		Dynll1		Clk2	Tardbp
Dusp16		Dyrk1a		Clk3	Tbc1d24
Dvl1		E2f1		Cln3	Tbp
Dvl2		E2f2		Cln5	Tbr1
Dvl3		E2f3		Cln6	Tbx1
Dynll1		E2f4		Clpb	Tbx3
Dynlt1b		E2f5		Clstn1	Tbx5
Dyrk1a		E2f6		Cltb	Tbx20
Dyrk3		Ebf3		Clu	Tbx21
E2f1		Ece1		Clybl	Tbx22
E2f2		Ece2		Cmas	Tcf4
E2f3		Echdc2		Cmklr1	Tcf20
E2f4		Echs1		Cmtm5	Tfap2a
E2f5		Eci2		Cmtr1	Tfap2b
E2f6		Ecm1		Cnbp	Tff1
Ebag9		Ecm2		Cndp1	Tgfb1
Ebp		Ecrg4		Cnih1	Tgfb2
Ech1		Ecscr		Cnih2	Tgfbi
Echdc2		Edil3		Cnih3	Tgfbr1
Echs1		Edn1		Cnmd	Tgfbr2
Eci2		Edn2		Cnn2	Tgif1
Ecm1		Ednra		Cnnm2	Thbs1
Edn1		Ednrb		Cnot1	Thra
Edn2		Eeig1		Cnot4	Thrb
Ednrb		Efhd2		Cnot6	Timp3
Eed		Efna1		Cnot9	Tlcd3b
Eef2k		Efna2		Cnr1	Tlr2
Efcab14		Efna3		Cnr2	Tlx3
Efl1		Efna5		Cntf	Tnni2
Efna1		Efnb1		Cntfr	Tph2
Efna5		Efnb2		Cntn1	Tpi1
Efnb1		Efnb3		Cntn2	Tpp1
Egr1		Eftud2		Cntn3	Traf6
Ehbp1l1		Egfl7		Cntn4	Trappc10
Ehd3		Egfr		Cntnap2	Trex1
Ehhadh		Egr1		Coa5	Trim37
Ehmt2		Ehd3		Col1a1	Trp53
Eif2ak1		Ehmt2		Col1a2	Trp53bp2
Eif2ak4		Eif2ak4		Col2a1	Trp53inp1
Eif2b1		Eif5a		Col3a1	Trp63
Eif2s1		Elavl1		Col4a1	Trp73
Eif4e		Elf4		Col4a2	Trpm3
Eif5a		Elk1		Col4a5	Trps1
Eif6		Elk3		Col4a6	Trpv3
Eipr1		Ell2		Col5a1	Trpv4
Elavl1		Eln		Col6a1	Tsc1
Elf1		Elovl5		Col6a2	Tsc2
Elf2		Emcn		Col6a3	Ttn
Elf4		Emilin1		Col9a1	Ttr
Elk1		Emilin2		Col9a2	Tub
Elk3		Eml2		Col9a3	Tubb3
Ell		Emp1		Col12a1	Tubb4a
Elmo3		Emp2		Col15a1	Tubb5
Eln		Emp3		Col17a1	Twist1
Eloc		En1		Col18a1	Txnip
Elovl2		Enah		Col22a1	Tyr
Elovl5		Enc1		Col24a1	Ube3a
Elovl6		Eng		Col27a1	Ube3b
Elp2		Eno1		Colgalt2	Uox
Emb		Eno2		Comt	Uros
Emc7		Eno3		Copg1	Vangl2
Emilin1		Enpp1		Cops2	Vdr
Emilin2		Enpp2		Cops5	Vhl
Eml1		Entpd1		Cops6	Vipas39
Enc1		Entpd4		Cops7b	Vldlr
Endod1		Ep300		Coq10a	Vps13a
Endog		Epas1		Coro7	Vsx1
Eng		Epb42		Cort	Washc5
Eno1		Epc1		Cotl1	Wdfy3
Eno2		Epha2		Cox4i1	Wdr35
Eno3		Epha3		Cox4i2	Whrn
Enoph1		Epha4		Cox5a	Wnt5a
Ep300		Epha7		Cox6a1	Wnt7a
Epas1		Ephb1		Cox6b1	Wt1
Epb41l2		Ephb2		Cox6c	Xbp1
Epb42		Ephb3		Cox7a2l	Yap1
Epcam		Ephb4		Cox7b	Yars1
Epha7		Ephb6		Cpa3	Ywhae
Ephx2		Ephx2		Cpa6	Ywhaz
Epo		Epo		Cpd	Yy1
Epor		Epor		Cpe	Zbtb18
Eppk1		Eppk1		Cplx1	Zdhhc13
Eprs1		Eps15		Cplx2	Zeb1
Eps8		Eps15l1		Cpm	Zeb2
Eps8l2		Erbb2		Cpsf1	Zfp423
Eps8l3		Erbb3		Cpsf4l	Zfp462
Eps15		Erbb4		Cpsf6	Zfp521
Eps15l1		Ercc6l		Cpsf7	Zic1
Ercc2		Erg		Cpt1a	Zic2
Ercc3		Erh		Cpt1c	Zic3
Ercc6l		Esam		Cpt2	Zic4
Erg		Esco2		Cpxm1
Erh		Esr1		Cpz	gene
Ermap		Esr2		Crabp1	Tacr
Esam		Esrra		Crabp2	Rcvrn
Esco2		Esrrb		Cradd	Syt2
Esd		Esrrg		Crat	Irx5
Esr1		Ess2		Crb1	Irx6
Esrra		Etfa		Creb3	Hcn4
Esrrb		Etfdh		Creb5	Pkar2b
Esrrg		Etl4		Crebbp	Grik1
Etfa		Etnk2		Crebzf	Kcng4
Etfdh		Ets1		Crh	Hcn1
Etl4		Ets2		Crhbp	Cabp5
Etnk2		Etv1		Crhr2	Grm6
Ets1		Etv4		Crim1	Isl1
Ets2		Etv5		Crip2	Scgn
Etv6		Etv6		Cript	Otx2
Eva1c		Eva1c		Crkl	Vsx2
Evi5		Evc		Crlf3	Car8
Ewsr1		Evc2		Crmp1	Sebox
Exo1		Ext1		Crot	Prkca
Exoc6		Ext2		Crtc2	Pcdh17
Exosc7		Extl3		Crx	Pcdh10
Extl2		Eya1		Crxos	Erbb4
Extl3		Eya4		Cry2	Nnat
Eya2		Ezh2		Cryaa	Col11a1
Ezh1		Ezr		Cryab	Sox6
Ezh2		F2r		Cryba1	Chrm2
Ezr		F2rl2		Cryba2	Slitrk5
F2		F3		Cryba4	Cck
F2r		Fabp3		Crybb1	Lect1
F2rl2		Fabp4		Crybb2	Igfn1
F2rl3		Fadd		Crybb3	Cpne9
F3		Fam3b		Cryga	Vstm2b
F5		Fam76b		Crygb	Casp7
F7		Fam89b		Crygc
F8a		Fam114a2		Crygd
F9		Fam124b		Cryge
F10		Fam167a		Crygf
F11		Fam181b		Crygn
F12		Fam210b		Crym
F13b		Farsa		Cryzl1
Faap20		Fastkd2		Cs
Fabp5		Fbln1		Csad
Fadd		Fbln2		Csdc2
Fads1		Fbln5		Csf1r
Fah		Fbn1		Csgalnact1
Fam53b		Fbn2		Csl
Fam89b		Fbxo8		Csmd3
Fam111a		Fbxo11		Csn1s2a
Fam114a2		Fbxo24		Csnk1d
Fam120a		Fbxo32		Csnk1e
Fam124b		Fbxo41		Csnk1g1
Fam180a		Fcgrt		Csnk2a1
Fam210b		Fdps		Csnk2a2
Fancc		Fech		Cspg4
Fance		Fem1c		Cspg5
Fars2		Fermt2		Csrp1
Farsb		Fetub		Csrp2
Fasn		Fgd5		Csrp3
Fastkd2		Fgf1		Cst3
Fastkd5		Fgf2		Cstb
Fbln1		Fgf5		Ctbp1
Fbln2		Fgf7		Ctbp2
Fbxo7		Fgf8		Ctcfl
Fbxo9		Fgf9		Ctf2
Fbxo11		Fgf10		Cthrc1
Fbxo34		Fgf11		Ctif
Fbxo48		Fgf12		Ctnna1
Fcgr1		Fgf13		Ctnna2
Fcgr2b		Fgf14		Ctnnb1
Fcgr3		Fgf16		Ctnnd1
Fcgr4		Fgf17		Ctnnd2
Fcna		Fgf20		Ctps2
Fcnb		Fgfbp1		Ctsa
Fdft1		Fgfbp3		Ctsb
Fdps		Fgfr1		Ctsc
Fech		Fgfr2		Ctsd
Ferd3l		Fgfr3		Ctse
Fermt1		Fgfr4		Ctsl
Fermt3		Fgfrl1		Cttn
Fetub		Fh1		Ctxn1
Ffar4		Fhl1		Cul1
Fga		Fhl2		Cul5
Fgb		Fhl5		Cul9
Fgf1		Fhod3		Cux1
Fgf2		Fign		Cux2
Fgf5		Fkbp3		Cxadr
Fgf7		Fkbp7		Cxcl1
Fgf9		Fkbp10		Cxcl9
Fgf10		Fkbp15		Cxcl12
Fgf13		Flcn		Cxcl14
Fgf18		Fli1		Cxcl15
Fgf21		Flna		Cxcr4
Fgfbp1		Flnb		Cxcr5
Fgfr1		Flnc		Cxcr6
Fgfr2		Flot1		Cxxc1
Fgfr3		Flrt2		Cxxc4
Fgfr4		Flrt3		Cyb5b
Fgfrl1		Flt1		Cyb5r4
Fgg		Flt4		Cyb561a3
Fggy		Fmo2		Cybrd1
Fh1		Fmod		Cyfip2
Fhl1		Fn1		Cyp1b1
Fibcd1		Fndc5		Cyp2b19
Fkbp3		Foxa1		Cyp4f13
Fkbp6		Foxa2		Cyp4v3
Fkbp11		Foxa3		Cyp4x1
Fli1		Foxc1		Cyp7b1
Flot1		Foxc2		Cyp17a1
Flt1		Foxd1		Cyp19a1
Flt3		Foxe1		Cyp26a1
Flt3l		Foxe3		Cyp26b1
Flt4		Foxf1		Cyp26c1
Fmo2		Foxf2		Cyp27a1
Fn1		Foxh1		Cyp39a1
Fn3krp		Foxi1		Cyp51
Fos		Foxj1		Cysltr1
Fosb		Foxj2		D16Ertd472e
Foxa1		Foxj3		D430041D05Rik
Foxa2		Foxl1		D630045J12Rik
Foxa3		Foxm1		Daam1
Foxc1		Foxn2		Daam2
Foxd1		Foxo1		Dab1
Foxf1		Foxp1		Dab2
Foxm1		Foxp2		Dach1
Foxn2		Frmd4a		Dach2
Foxo1		Frmd5		Dact2
Foxo3		Frmd6		Dag1
Foxp1		Frmd7		Dap3
Fpgs		Frs2		Dapk1
Frat2		Frs3		Dapl1
Frrs1		Frzb		Dars1
Frs2		Fscn1		Dazap1
Frzb		Fst		Dazap2
Ftcd		Fstl1		Dbn1
Fth1		Fstl5		Dbnl
Ftl1		Fth1		Dbt
Fto		Fubp1		Dbx2
Fubp1		Fubp3		Dcc
Fxn		Fuca1		Dcdc5
Fyn		Furin		Dclk1
Fyttd1		Fxn		Dclk2
Fzd1		Fxr1		Dcn
Fzd2		Fxyd5		Dcps
Fzd3		Fxyd6		Dct
Fzd4		Fyn		Dctn2
Fzd5		Fzd1		Dcun1d4
Fzd6		Fzd2		Dcx
Fzd7		Fzd4		Ddah1
Fzd8		Fzd6		Ddah2
Fzd9		Fzd7		Ddc
Fzd10		Fzd8		Ddit4
Fzr1		Fzd10		Ddit4l
G0s2		G3bp1		Ddo
G3bp1		Gaa		Ddost
G6pc1		Gabpa		Ddr1
Gabbr2		Gabrb1		Ddr2
Gabpa		Gabrb2		Ddx3x
Gabrb1		Gabre		Ddx5
Gabrb2		Gad2		Ddx17
Gabrd		Gadd45a		Ddx19a
Gad2		Gadd45b		Ddx39a
Gadd45a		Gal		Ddx59
Gadd45g		Gal3st1		Ddx60
Gak		Galk1		Deaf1
Galk1		Galk2		Dedd
Galm		Galnt1		Defb11
Galnt1		Galnt3		Degs1
Galnt10		Galnt17		Dek
Galnt12		Galnt18		Dennd6b
Galnt17		Ganab		Derl3
Galnt18		Gapdh		Des
Ganab		Garem1		Dgcr2
Gapdh		Gars		Dgcr6
Gars		Gart		Dgcr8
Gart		Gas1		Dgkb
Gas1		Gas2l3		Dgkg
Gata1		Gask1b		Dgkh
Gata2		Gata1		Dgkz
Gata3		Gata2		Dguok
Gata4		Gata3		Dhcr7
Gata6		Gata4		Dhcr24
Gatd3a		Gata5		Dhh
Gba1		Gata6		Dhrs3
Gba2		Gatd3a		Dhx9
Gbp2		Gba1		Dhx58
Gc		Gbp2		Dicer1
Gcat		Gbx2		Dio2
Gcgr		Gcat		Dip2a
Gch1		Gch1		Dip2b
Gck		Gck		Dipk1c
Gckr		Gclc		Diras1
Gclc		Gcn1		Diras2
Gclm		Gcnt1		Disp2
Gcn1		Gcnt2		Dixdc1
Gcnt1		Gdf5		Dkc1
Gcsh		Gdi1		Dkk1
Gdap2		Gdi2		Dkk2
Gdf1		Gemin5		Dkk3
Gdf2		Get1		Dkk4
Gdf15		Gfap		Dld
Gdi1		Ggps1		Dlg1
Gdi2		Ghitm		Dlg3
Gdnf		Gins1		Dlg4
Gfi1		Gipc1		Dlgap4
Gfi1b		Gja1		Dlk1
Gfm2		Gja4		Dll1
Ggcx		Gja5		Dll4
Ggps1		Gjc1		Dlst
Ghitm		Gjd3		Dlx1
Ghr		Gjd4		Dlx2
Gins1		Gli1		Dlx3
Gja1		Gli2		Dlx5
Gjb1		Glis1		Dlx6
Gjb2		Gls		Dmbx1
Gjd4		Glud1		Dmd
Glb1		Gm3012		Dmrta2
Glcci1		Gm3099		Dmtf1
Gldc		Gm3776		Dmtf1l
Glg1		Gm5795		Dmtn
Gli1		Gm6676		Dmwd
Glp1r		Gm10413		Dnajb1
Glrb		Gm16434		Dnajb5
Glrx2		Gmds		Dnajb6
Gls2		Gmeb2		Dnajb9
Glud1		Gmfb		Dnajc6
Glyctk		Gmfg		Dnajc8
Gm3776		Gmppb		Dnal4
Gmfb		Gmps		Dner
Gmfg		Gna11		Dnmbp
Gmnn		Gna12		Dnmt1
Gmppb		Gna14		Dnmt3a
Gmpr		Gnai2		Dnmt3b
Gmps		Gnao1		Dnmt3l
Gnai2		Gnaq		Dock7
Gne		Gnas		Dock10
Gnl3		Gnb1l		Dohh
Gnmt		Gnb4		Dok1
Gnpat		Gne		Dok4
Gnpnat1		Gnpnat1		Dok5
Golga5		Golga4		Donson
Golph3		Golim4		Dop1b
Got1		Got1		Dot1l
Got2		Got2		Dpf1
Gp1ba		Gpc1		Dpf2
Gp5		Gpc4		Dpf3
Gp6		Gpc6		Dpm1
Gp9		Gpd2		Dpm3
Gpam		Gpi1		Dpp6
Gpc3		Gpnmb		Dppa1
Gpc6		Gpr85		Dpy19l1
Gpd1		Gpr88		Dpyd
Gpd2		Gpr101		Dpysl2
Gpi1		Gpr153		Dpysl3
Gpld1		Gpr182		Dpysl4
Gpn2		Gpx1		Dpysl5
Gpr12		Gpx2		Dr1
Gpr37		Gpx3		Draxin
Gpr88		Gpx4		Drd1
Gpr89		Gpx6		Drd2
Gpr142		Gpx7		Drd3
Gpr182		Gpx8		Drd4
Gps1		Grb2		Drd5
Gpt2		Grb10		Drosha
Gpx1		Grcc10		Dsc2
Gpx2		Grhl1		Dscam
Gpx3		Grhl3		Dsel
Gpx4		Gria1		Dsg2
Gpx6		Grin1		Dsn1
Gramd1a		Grina		Dsp
Gramd1c		Gripap1		Dstn
Grap2		Grk2		Dtd1
Grb2		Grm3		Dtna
Grb7		Gsc		Dtx1
Grb10		Gsk3b		Dtx4
Greb1		Gskip		Dus2
Greb1l		Gsn		Dusp1
Grhpr		Gsta1		Dusp2
Grk2		Gsta2		Dusp5
Grn		Gsta4		Dusp6
Grpel1		Gstm2		Dusp8
Gsk3b		Gstm6		Dusp9
Gskip		Gsto2		Dusp10
Gsn		Gstp2		Dusp11
Gss		Gsx1		Dusp12
Gsta1		Gtf2i		Dusp14
Gsta2		Gtf2ird1		Dusp16
Gsta3		Guca2a		Dusp18
Gsta4		Gucy1a1		Dusp26
Gstm1		Gucy1b1		Dvl1
Gstm2		Guk1		Dvl2
Gstm4		Gusb		Dvl3
Gstm5		Gyg1		Dync1h1
Gstm6		Gys1		Dynll1
Gstm7		Gzf1		Dynll2
Gsto2		H1f10		Dynlrb1
Gstp1		H2ax		Dynlt1b
Gstp2		H2az1		Dyrk1a
Gstp3		H2bc4		E2f1
Gstt1		H3f3a		E2f2
Gstz1		H13		E2f3
Gtf2e2		Hacd1		E2f4
Gtf2h2		Hacd3		E2f5
Gtf2h5		Hacd4		E2f6
Gtf2i		Hadha		E2f8
Gtf2ird1		Hagh		E4f1
Gtf3c2		Hand1		E030030I06Rik
Gucd1		Hand2		E130308A19Rik
Gucy1a1		Hapln1		Eaf2
Gucy1b1		Hars1		Ebag9
Guk1		Hars2		Ebf1
Gulo		Has1		Ebf2
Gusb		Has2		Ebf3
Gypc		Has3		Ebf4
Gys1		Hba-x		Ebpl
Gys2		Hbb-b1		Ece1
H1f6		Hbb-bh1		Ecel1
H2-D1		Hbb-bh2		Echdc2
H2-K1		Hbegf		Echs1
H2-M3		Hbp1		Ecm2
H2-Q4		Hcn1		Eda
H2-Q7		Hcn2		Edar
H2-T22		Hcn3		Edaradd
H2-T23		Hcn4		Edf1
H2-T24		Hdac1		Edn1
H2ax		Hdac2		Ednra
H2bc4		Hdac3		Ednrb
H3f3a		Hdac7		Eed
H6pd		Hdac9		Eef1a1
H13		Hdc		Eef1a2
Habp2		Hddc2		Eef1b2
Hacd1		Heatr5a		Eef1e1
Hacd3		Hectd1		Efcab14
Hacl1		Hectd4		Efna1
Hadh		Hepacam		Efna2
Hadha		Hes1		Efna3
Hadhb		Hes3		Efna5
Hagh		Hes6		Efnb1
Hal		Hexim1		Efnb2
Hand1		Hexim2		Efnb3
Hao1		Hey1		Eftud2
Hars1		Hey2		Egfl7
Hat1		Hgd		Egfr
Haus1		Hgf		Egr1
Haus6		Hhex		Ehf
Havcr1		Hif1a		Ehhadh
Havcr2		Hip1		Ehmt2
Hba-a1		Hipk3		Eif2a
Hba-x		Hira		Eif2ak3
Hbb-b1		Hivep2		Eif2b1
Hbb-b2		Hk1		Eif2b3
Hbb-bh1		Hk2		Eif2b4
Hbb-bh2		Hk3		Eif2b5
Hbb-bs		Hlf		Eif3a
Hbb-bt		Hltf		Eif3b
Hbb-y		Hlx		Eif3c
Hbp1		Hmg20a		Eif4a1
Hbq1a		Hmga2		Eif4e3
Hbq1b		Hmgb1		Eif4g3
Hc		Hmgb2		Eif5
Hdac1		Hmgcr		Eif5a
Hdac2		Hmgcs2		Eipr1
Hdac3		Hmgn1		Elavl1
Hdc		Hmgn2		Elavl2
Hdgf		Hmgn5		Elavl3
Heatr1		Hmmr		Elavl4
Hectd4		Hmox2		Elf1
Hells		Hmx2		Elf2
Helz2		Hnf1b		Elf3
Hemgn		Hnf4a		Elk1
Herc1		Hnrnpd		Elk3
Hes1		Hnrnpdl		Elk4
Hes3		Hnrnph2		Ell2
Hesx1		Homer1		Elmo1
Hexim1		Hopx		Elmo2
Hey2		Hoxa1		Elmo3
Hgd		Hoxa2		Eln
Hgf		Hoxa3		Elovl4
Hgfac		Hoxa4		Elovl5
Hhex		Hoxa5		Elovl6
Hif1a		Hoxa6		Elp2
Higd2a		Hoxa9		Elp4
Hinfp		Hoxa10		Emb
Hip1r		Hoxb1		Emc7
Hipk2		Hoxb5		Emg1
Hivep2		Hoxb6		Emilin1
Hk1		Hoxb7		Emilin3
Hk2		Hoxc6		Eml2
Hk3		Hoxd4		Eml4
Hkdc1		Hpn		Eml6
Hltf		Hprt1		Emx1
Hlx		Hras		Emx2
Hmbs		Hs3st2		En1
Hmga1		Hs6st1		En2
Hmga1b		Hs6st2		Enah
Hmga2		Hsd3b4		Enc1
Hmgb1		Hsd3b6		Endod1
Hmgb2		Hsd3b7		Enkd1
Hmgb3		Hsd3b8		Eno1
Hmgcl		Hsd3b9		Eno2
Hmgcs1		Hsd11b1		Eno3
Hmgcs2		Hsd17b10		Enox1
Hmgn1		Hsd17b12		Enox2
Hmgn2		Hsf1		Enpp1
Hmox1		Hsf2		Enpp2
Hmox2		Hsf2bp		Enpp5
Hnf1a		Hsf3		Ensa
Hnf1b		Hsp90ab1		Entpd3
Hnf4a		Hspa4l		Entpd4
Hnrnpab		Hspa5		Entpd6
Hnrnpd		Hspa8		Eny2
Hnrnpdl		Hspa13		Eomes
Hnrnph1		Hspb1		Ep300
Hoxa2		Hspb7		Epb41
Hoxa5		Hspb8		Epb41l2
Hoxa9		Hspg2		Epb41l4a
Hoxb2		Hsph1		Epc1
Hoxb5		Htatip2		Epcam
Hoxb6		Htr2a		Epha1
Hoxb7		Htr2b		Epha3
Hoxb8		Htr2c		Epha4
Hoxc6		Htra1		Epha5
Hoxd3		Htt		Epha6
Hp		Hunk		Epha7
Hpd		Hyal2		Epha8
Hpgd		Hyls1		Ephb1
Hpgds		Ica1		Ephb2
Hpn		Id1		Ephb3
Hprt1		Id2		Ephb4
Hpx		Id3		Ephb6
Hras		Ide		Ephx2
Hs6st1		Idh1		Eppk1
Hs6st2		Idh2		Eps8
Hsd3b1		Idh3a		Eps8l2
Hsd3b2		Idh3b		Eps8l3
Hsd3b3		Idh3g		Eps15l1
Hsd3b4		Ifi27		Epsti1
Hsd3b6		Ifit1		Epyc
Hsd3b7		Ifitm2		Erbb2
Hsd3b8		Ifnar1		Erbb3
Hsd3b9		Ifnar2		Erbb4
Hsd11b1		Ifngr2		Erc1
Hsd17b2		Ift25		Erc2
Hsd17b4		Ift27		Ercc2
Hsd17b7		Ift74		Ercc3
Hsd17b10		Ift88		Ercc5
Hsd17b12		Ift140		Erdr1x
Hsp90aa1		Ift172		Erg
Hsp90ab1		Igf1		Erh
Hsp90b1		Igf1r		Eri1
Hspa4l		Igf2		Ern2
Hspa5		Igf2bp1		Esco2
Hspa8		Igf2r		Esd
Hspb7		Igfbp5		Esm1
Hspb8		Igfbpl1		Esp8
Hspg2		Ighmbp2		Esr1
Hsph1		Igsf8		Esrp1
Htra1		Iigp1		Esrp2
Htt		Ikbkb		Esrra
Hunk		Ikzf5		Esrrb
Hyal2		Il1b		Esrrg
Iars1		Il10rb		Ess2
Iars2		Il11ra1		Esx1
Ica1		Il11ra2		Esyt1
Icam4		Ilk		Esyt2
Icosl		Impa2		Etfa
Id1		Impact		Etfb
Id2		Impdh2		Etl4
Id3		Incenp		Etnk1
Id4		Inha		Ets1
Ide		Inhba		Ets2
Idh1		Inhbb		Etv1
Idh2		Inka1		Etv3
Idh3a		Inmt		Etv4
Idh3b		Inpp4b		Etv5
Idh3g		Inpp5f		Etv6
Idi1		Inppl1		Eva1c
Ier5l		Insm1		Evl
Ifi30		Insm2		Evx1
Ifi47		Insr		Evx2
Ifit1		Ints14		Ewsr1
Ifitm2		Invs		Exd2
Ifitm7		Ip6k1		Exo1
Ifnar1		Ip6k2		Exosc6
Ifnar2		Ippk		Ext1
Ifnb1		Iqcb1		Ext2
Ifng		Iqgap1		Extl3
Ifngr1		Iqgap2		Eya1
Ifngr2		Irf2		Eya2
Ifrd1		Irf2bp2		Eya3
Ifrd2		Irs4		Ezh1
Ift88		Irx1		Ezh2
Igdcc4		Irx2		Ezr
Igf1		Irx3		F2r
Igf2		Irx4		F3
Igf2bp1		Irx5		F11r
Igf2bp2		Irx6		Fabp3
Igf2bp3		Isl1		Fabp4
Igf2r		Itga2		Fabp5
Igfbp1		Itga3		Fabp7
Igfbp2		Itga4		Fads1
Igfbp3		Itga5		Fah
Igfbp4		Itga6		Fam3b
Ighmbp2		Itga7		Fam3c
Igll1		Itgal		Fam53b
Igsf1		Itgam		Fam89b
Igtp		Itgav		Fam110d
Ihh		Itgax		Fam114a2
Ikzf1		Itgb1		Fam120a
Ikzf3		Itgb2		Fam124b
Il1a		Itgb3		Fam131a
Il1b		Itgb4		Fam135a
Il1r1		Itgb5		Fam161a
Il1r2		Itgb8		Fam171b
Il1rap		Itgbl1		Fam180a
Il1rl1		Itih4		Fam181a
Il2		Itih5		Fam184b
Il2rg		Itpa		Fam193b
Il4		Itpr1		Fam216a
Il4ra		Itsn1		Fam222a
Il6		Ivd		Fam234b
Il6ra		Ivns1abp		Fap
Il6st		Jade1		Farp1
Il7		Jag1		Fars2
Il9		Jag2		Farsb
Il10		Jam2		Fasn
Il10rb		Jarid2		Fat1
Il11		Jmjd1c		Fat3
Il11ra2		Josd2		Fbl
Il13		Jph1		Fblim1
Il13ra1		Jph2		Fbn1
Il13ra2		Jun		Fbn2
Il15		Jup		Fbxl5
Il18bp		Kank1		Fbxl22
Il21		Kars1		Fbxo21
Immt		Kat2b		Fbxo25
Impa1		Katnb1		Fbxo27
Impa2		Kazn		Fbxo38
Impact		Kcna1		Fbxw2
Impdh2		Kcna2		Fbxw5
Ing2		Kcna3		Fcer1g
Inhbc		Kcna4		Fcho1
Inhbe		Kcna5		Fdft1
Inmt		Kcna6		Fdps
Inpp5b		Kcna7		Fem1a
Inpp5d		Kcnab1		Fem1b
Inppl1		Kcnab2		Ferd3l
Insig1		Kcnab3		Fes
Insr		Kcnb1		Fezf2
Ints15		Kcnc2		Fgd4
Ip6k1		Kcnc3		Fgf1
Ipo13		Kcnd1		Fgf2
Iqgap2		Kcnd2		Fgf3
Irag1		Kcnd3		Fgf5
Irag2		Kcne1		Fgf6
Irak4		Kcne2		Fgf7
Irf2bp2		Kcne3		Fgf8
Irf4		Kcne4		Fgf9
Irs4		Kcne5		Fgf10
Isca1		Kcnf1		Fgf11
Isg20		Kcnh1		Fgf12
Isl1		Kcnh2		Fgf13
Itga2		Kcnh6		Fgf14
Itga2b		Kcnh7		Fgf15
Itga3		Kcnip2		Fgf18
Itga4		Kcnj1		Fgfr1
Itga5		Kcnj2		Fgfr2
Itga7		Kcnj3		Fgfr3
Itgam		Kcnj5		Fgfr4
Itgb1		Kcnj8		Fgfrl1
Itgb2		Kcnj10		Fh1
Itgb3		Kcnj11		Fhl1
Itgb5		Kcnj14		Fhod1
Itih1		Kcnj15		Fibin
Itih2		Kcnj16		Fiz1
Itih3		Kcnk2		Fkbp2
Itih4		Kcnk3		Fkbp3
Itih5		Kcnk5		Fkbp7
Itpa		Kcnk6		Fkbp15
Itpkb		Kcnk13		Fktn
Ivd		Kcnma1		Flcn
Jade1		Kcnn1		Flg
Jade3		Kcnn3		Fli1
Jag1		Kcnn4		Flnc
Jag2		Kcnq1		Flot1
Jak2		Kcnq4		Flrt1
Jam2		Kcnq5		Flrt2
Jarid2		Kcns2		Flrt3
Jpt1		Kcnv2		Flt3l
Jun		Kdm1a		Flt4
Junb		Kdm4b		Flywch1
Kars1		Kdm6a		Fmnl3
Kat6a		Kdm8		Fmo3
Kcnj5		Kdr		Fmr1
Kcnk6		Kif1b		Fn1
Kcnn4		Kif2c		Fnbp1l
Kcnq1		Kif3a		Fndc1
Kctd11		Kif4		Foxa1
Kdm1b		Kif5b		Foxa2
Kdm6a		Kif7		Foxb2
Kdm6b		Kif11		Foxc1
Kdr		Kif15		Foxc2
Khdrbs1		Kifap3		Foxd1
Khk		Kifc1		Foxd2
Kif2c		Kifc5b		Foxd3
Kif3b		Kin		Foxd4
Kif4		Kirrel		Foxe3
Kif5b		Kit		Foxf1
Kif11		Kitl		Foxf2
Kif15		Klf2		Foxg1
Kifc1		Klf4		Foxi1
Kifc5b		Klf6		Foxi2
Kin		Klf10		Foxi3
Kit		Klf11		Foxj1
Kitl		Klf13		Foxj2
Klb		Klf16		Foxj3
Klf1		Klhdc8b		Foxk1
Klf2		Klhl4		Foxl1
Klf4		Klhl30		Foxl2
Klf8		Klk8		Foxm1
Klf10		Kmt2d		Foxn1
Klf11		Kmt2e		Foxn2
Klf13		Kpna2		Foxn4
Klf15		Kpna4		Foxo1
Klf16		Kras		Foxo3
Klkb1		Kremen1		Foxp1
Klrc1		Krit1		Foxp2
Kmt2a		Krt8		Foxp3
Kmt2b		Krtap11-1		Foxp4
Kmt5c		Krtap12-1		Foxq1
Kpna1		Ksr1		Fras1
Kpna2		Ktn1		Frat1
Kpna4		L1cam		Frat2
Kpnb1		L2hgdh		Frem1
Kras		Lalba		Frem2
Krit1		Lama1		Frem3
Krt8		Lama2		Frk
Krt18		Lamb1		Frmd5
Krt19		Lamc1		Frmpd2
Krtap11-1		Lamp2		Fry
Kyat1		Lancl1		Fscn1
L2hgdh		Lap3		Fsd1
Lactb2		Laptm4a		Fst
Lama1		Laptm5		Fstl1
Lamb1		Larp1		Fstl4
Lamb2		Lars1		Fstl5
Lamb3		Lbh		Fth1
Lamc1		Lbp		Ftl1
Lamp5		Lbx1		Ftsj3
Lap3		Lca5		Fubp1
Laptm4b		Lcat		Fubp3
Laptm5		Lck		Fus
Lars1		Lclat1		Fut4
Lat		Lcp1		Fut10
Lbp		Ldb2		Fxn
Lcat		Ldb3		Fxr1
Lclat1		Ldha		Fxr2
Lcn2		Ldhb		Fyco1
Ldb1		Ldhc		Fyn
Ldb3		Lef1		Fzd1
Ldha		Lemd2		Fzd2
Ldhc		Leng9		Fzd3
Lect2		Leo1		Fzd4
Lef1		Leprot		Fzd5
Lemd2		Lgals1		Fzd6
Leng8		Lgals9		Fzd7
Lepr		Lgr4		Fzd8
Lgals3		Lgr5		Fzd9
Lgals3bp		Lgr6		Fzd10
Lgals9		Lhx1		G2e3
Lhx2		Lhx2		G3bp1
Lhx4		Lhx3		G3bp2
Lhx9		Lhx4		G6pc3
Lias		Lhx6		Gaa
Lifr		Lhx9		Gabarapl1
Lig1		Lif		Gabbr1
Lims1		Lig1		Gabbr2
Lin28a		Limch1		Gabpa
Lin28b		Limk1		Gabra1
Lingo1		Lims1		Gabra2
Lipa		Lin28a		Gabra3
Lipc		Lipg		Gabra4
Litaf		Lix1		Gabra6
Lmbrd1		Llgl1		Gabrb1
Lmna		Lmcd1		Gabrb2
Lmo2		Lmf1		Gabrb3
Lmo7		Lmna		Gabrd
Lmtk3		Lmo1		Gabrg1
Lonp1		Lmo2		Gabrg2
Lpar2		Lmo4		Gabrg3
Lpar4		Lmo7		Gabrr1
Lpar5		Lmod1		Gabrr2
Lpcat3		Lmod2		Gabrr3
Lpin1		Lmod3		Gad1
Lpin2		Lox		Gad2
Lpl		Loxl3		Gadd45a
Lrat		Lpar3		Gadd45g
Lrfn3		Lpar4		Gak
Lrfn4		Lpcat3		Gal
Lrp1		Lpl		Galk1
Lrp4		Lrfn3		Galns
Lrp5		Lrig1		Galnt1
Lrp6		Lrp2		Galnt2
Lrpap1		Lrp4		Galnt7
Lrrc3		Lrp5		Galnt9
Lrrc24		Lrrc3		Galnt10
Lrrc32		Lrrc4b		Galnt14
Lrrc49		Lrrc10		Galnt17
Lrrk1		Lrrc32		Galnt18
Lrrk2		Lrrcc1		Galntl6
Lrrn3		Lrrk1		Ganab
Lsamp		Lrrk2		Gap43
Lsr		Lsamp		Gapdh
Lss		Lsp1		Gart
Lta		Lss		Gas1
Lta4h		Lta4h		Gas2
Ltbp1		Ltbp1		Gask1b
Ltbp3		Ltbp2		Gata2
Ltf		Ltbp3		Gata3
Ly6a		Ltn1		Gata6
Ly6c1		Lum		Gatad1
Ly6e		Luzp1		Gatd3a
Lyar		Lyl1		Gba1
Lyl1		Lypd9		Gba2
Lyn		Lyve1		Gbe1
Lypd1		Lztr1		Gbp2
Lyve1		Macrod2		Gbx1
Lyz1		Macroh2a1		Gbx2
Lyz2		Mad2l2		Gcat
M6pr		Mafb		Gch1
Macroh2a1		Mafg		Gck
Mad2l2		Mafk		Gcm2
Maf1		Magea2		Gcnt1
Mafa		Magea4		Gdap1l1
Mafb		Magea6		Gdap2
Mafg		Magea8		Gde1
Mafk		Magea10		Gdf6
Magea2		Mageb1		Gdf11
Magea4		Mageb3		Gdi1
Magea6		Mageb4		Gdi2
Magea8		Mageb16		Gdnf
Magea10		Mageb18		Gdpd1
Mageb1		Maged1		Gdpd5
Mageb3		Maged2		Gemin2
Mageb4		Magee1		Get1
Mageb16		Magee2		Get3
Mageb18		Mageh1		Get4
Maged1		Magel2		Gfap
Maged2		Mak		Gfi1
Magee1		Maml3		Ggnbp2
Magee2		Man1a2		Ggt7
Mageh1		Man2b1		Ghitm
Magel2		Manba		Ghr
Mak16		Maob		Gins1
Man1a		Map1lc3a		Gipc1
Man1a2		Map1lc3b		Gja1
Man2b1		Map2		Gja3
Manba		Map2k1		Gja4
Maob		Map2k2		Gja8
Map1lc3b		Map2k3		Gjb2
Map2k1		Map2k4		Gjd2
Map2k2		Map2k7		Gjd4
Map2k3		Map3k2		Gje1
Map2k4		Map3k3		Glcci1
Map2k7		Map3k5		Glce
Map3k2		Map3k6		Gldc
Map3k5		Map3k7cl		Glg1
Map3k7		Map3k12		Gli1
Map3k7cl		Map3k14		Gli2
Map3k12		Map3k20		Gli3
Map4k1		Map4k1		Glis1
Map7		Map4k3		Glis2
Mapk1		Map7		Glis3
Mapk3		Mapk1		Glo1
Mapk6		Mapk3		Gls
Mapkapk3		Mapk6		Glud1
Marchf2		Mapk7		Glul
Marchf3		Mapk10		Glycam1
Marcksl1		Marcksl1		Glyr1
Mark3		Mars1		Gm2a
Mars1		Marveld1		Gm3099
Marveld1		Matn1		Gm6676
Masp1		Matn2		Gm14290
Masp2		Matn4		Gm16434
Mastl		Matr3		Gmcl1
Mat1a		Maz		Gmds
Mat2a		Mb		Gmfb
Mat2b		Mbd5		Gmppa
Maz		Mbnl1		Gmppb
Mbd5		Mbnl2		Gmpr
Mbnl2		Mbp		Gmpr2
Mboat2		Mbtps2		Gmps
Mboat7		Mcc		Gna12
Mbp		Mccc1		Gna13
Mbtd1		Mcm3		Gnai2
Mbtps2		Mcm3ap		Gnao1
Mccc1		Mcm4		Gnaq
Mcl1		Mcm5		Gnas
Mcm3		Mcm7		Gnb3
Mcm3ap		Mcts2		Gnb4
Mcm5		Mcu		Gng2
Mcm7		Mcur1		Gng3
Mcpt8		Mdh1		Gng5
Mcts2		Mdh2		Gng7
Mcu		Mdk		Gnl3
Mcur1		Me1		Gnpat
Mdh1		Me3		Gnpnat1
Mdh2		Mecom		Gns
Mdk		Mecp2		Golga2
Mdm2		Med14		Golga4
Me1		Med28		Gorasp2
Me2		Mef2a		Got1
Mecom		Mef2b		Got2
Mecp2		Mef2c		Gp1bb
Med1		Mef2d		Gpam
Med14		Megf8		Gpank1
Med24		Meis1		Gpatch1
Med28		Meis2		Gpatch3
Mef2c		Melk		Gpc1
Meis1		Memo1		Gpc2
Melk		Men1		Gpc4
Memo1		Meox1		Gpc6
Meox2		Meox2		Gpd2
Mertk		Mest		Gphn
Mest		Met		Gpi1
Met		Mettl2		Gpm6a
Mettl3		Mfap2		Gpnmb
Mettl14		Mfap3		Gpr6
Mfng		Mfap4		Gpr37
Mfsd2b		Mfn2		Gpr55
Mgam		Mga		Gpr85
Mgat2		Mgat2		Gpr101
Mgll		Mgp		Gpr137b
Mgst1		Mgrn1		Gpr142
Mgst3		Mgst1		Gpr143
Mia2		Mgst3		Gpr153
Micall2		Mia3		Gpr158
Micu1		Micu1		Gpr161
Mif		Mid1		Gpr162
Mindy2		Mid2		Gpr173
Minpp1		Midn		Gpr182
Mis18a		Mif		Gpr183
Mki67		Mindy3		Gprasp2
Mkln1		Mis18a		Gprin1
Mknk1		Mitf		Gps1
Mks1		Mki67		Gpsm2
Mllt3		Mkks		Gpt2
Mllt10		Mkln1		Gpx1
Mllt11		Mks1		Gpx3
Mlxipl		Mkx		Gpx4
Mmaa		Mllt3		Gpx6
Mmab		Mllt6		Gpx7
Mmachc		Mlxipl		Gpx8
Mmadhc		Mmaa		Gramd4
Mmd2		Mmab		Grb7
Mmp2		Mmachc		Grb10
Mmp3		Mmadhc		Greb1
Mmp8		Mmp2		Grem1
Mmp9		Mmp9		Grhl1
Mmp13		Mmp14		Grhl2
Mmp14		Mmp15		Grhl3
Mmp15		Mmp28		Gria1
Mmrn1		Mmrn2		Gria2
Mms19		Mmut		Gria3
Mmut		Morc3		Gria4
Mnt		Morf4l1		Grid1
Mogat2		Mosmo		Grik1
Mogs		Mov10l1		Grik2
Morc3		Mpzl1		Grik3
Morf4l1		Mrap		Grik4
Mosmo		Mrpl22		Grik5
Mpg		Mrpl39		Grin1
Mpl		Mrpl40		Grin2a
Mpo		Mrps6		Grin2b
Mpp1		Mrtfb		Grin2c
Mpzl1		Msln		Grin3b
Mpzl2		Mslnl		Grip1
Mrc1		Msn		Gripap1
Mrm3		Msrb3		Grm1
Mrpl15		Msx1		Grm3
Mrpl17		Msx2		Grm4
Mrpl20		mt-Atp6		Grm8
Mrpl23		mt-Co2		Grsf1
Mrps27		mt-Co3		Grtp1
Mrps30		Mtap		Gsc2
Mrps31		Mterf4		Gsk3a
Mrtfa		Mtf2		Gsk3b
Mrtfb		Mthfd1		Gsn
Mrto4		Mthfd1l		Gsr
Ms4a3		Mthfd2		Gss
Msmo1		Mthfr		Gsta4
Msr1		Mtmr1		Gstm1
Mst1		Mtmr3		Gstm2
Mst1r		Mtmr6		Gstm5
Msto1		Mtpn		Gstm7
Mt1		Mtss1		Gsto1
Mt2		Mtus1		Gstp1
mt-Atp6		Mtus2		Gstp2
mt-Co3		Musk		Gstt1
Mta2		Mxra8		Gstz1
Mtap		Myb		Gsx1
Mtcp1		Mybpc3		Gtf2e1
Mtdh		Mybphl		Gtf2i
Mterf4		Myc		Gtf2ird1
Mtfr2		Mycn		Gtf3c2
Mthfd1		Myh3		Gtpbp2
Mthfd1l		Myh4		Guca1a
Mthfd2		Myh6		Gucy1a1
Mthfr		Myh7		Gucy1b1
Mthfs		Myh7b		Guk1
Mthfsl		Myh9		Gusb
Mtif2		Myh10		Gys1
Mtmr1		Myh11		Gzf1
Mtmr3		Myl1		Gzmn
Mtor		Myl2		H2-Oa
Mtpap		Myl3		H2ac24
Mtpn		Myl4		H2ax
Mtr		Myl7		H2bc4
Mtrr		Myl9		H3f3a
Mtss1		Mylip		H3f3b
Mttp		Mylk		Habp4
Mtus1		Mylk3		Hacd1
Mtx1		Mylpf		Hacd3
Mup3		Myo18a		Hacd4
Mup7		Myocd		Hace1
Mup10		Myog		Hacl1
Mup19		Myom1		Hadh
Mup20		Myom2		Hadha
Mvk		Myot		Hagh
Mxd1		Myoz1		Haghl
Myb		Myoz2		Hap1
Mybbp1a		Myzap		Hapstr1
Mybl2		N6amt1		Hars1
Mybpc3		Naa80		Has1
Myc		Naca		Has2
Mycn		Nap1l1		Has3
Myef2		Nap1l4		Hat1
Myh11		Nap1l5		Haus6
Myl9		Nars1		Hbb-bs
Mylip		Nav1		Hbp1
Mylk		Nav2		Hcar1
Mylk3		Nbn		Hcfc2
Myo5c		Nbr1		Hck
Myo7a		Ncald		Hcn4
Myog		Ncam1		Hcrt
Myom1		Ncam2		Hdac1
Myot		Nck1		Hdac2
Naca		Ncoa4		Hdac3
Nadsyn1		Ncoa5		Hdac5
Naip1		Ncoa7		Hdac6
Nanp		Ncor2		Hdac7
Nap1l4		Nde1		Hdac8
Nap1l5		Ndel1		Hdac10
Napb		Ndn		Hddc3
Naprt		Ndnf		Hdgfl2
Narf		Ndrg2		Heatr5a
Nars1		Ndufa2		Hectd1
Nat2		Ndufa4		Hectd4
Nat10		Ndufa4l2		Hecw1
Nav3		Ndufa9		Hells
Nbas		Ndufa10		Hepacam
Nbn		Ndufa13		Hephl1
Ncapg		Ndufab1		Herc1
Ncapg2		Ndufb3		Herc3
Ncf1		Ndufb7		Hes1
Ncf2		Ndufb8		Hes2
Ncf4		Ndufb9		Hes3
Ncoa4		Ndufb11		Hes5
Ncoa6		Ndufs1		Hes6
Ncor2		Ndufs2		Hesx1
Nde1		Ndufs3		Hexb
Ndel1		Ndufs4		Hexim1
Ndn		Ndufv3		Hey1
Ndrg1		Nedd4		Hey2
Ndrg2		Nedd8		Hgd
Ndst1		Nedd9		Hgf
Ndufa1		Negr1		Hgh1
Ndufa2		Nek6		Hgs
Ndufa4		Nek7		Hgsnat
Ndufa5		Neo1		Hhex
Ndufa6		Neurl1b		Hhip
Ndufa8		Neurod6		Hibadh
Ndufa9		Neurog1		Hic1
Ndufa10		Nexn		Hif1a
Ndufa12		Nf1		Higd2a
Ndufa13		Nf2		Hip1r
Ndufab1		Nfat5		Hipk2
Ndufaf4		Nfatc1		Hira
Ndufb3		Nfatc2		Hjurp
Ndufb7		Nfatc3		Hjv
Ndufb8		Nfatc4		Hk1
Ndufb9		Nfe2l1		Hk2
Ndufb10		Nfe2l2		Hkdc1
Ndufs1		Nfia		Hlcs
Ndufs2		Nfib		Hmbox1
Ndufs3		Nfil3		Hmg20a
Ndufs5		Nfix		Hmga1
Ndufs7		Nfkbib		Hmga1b
Ndufv1		Nfkbie		Hmga2
Ndufv3		Nfkbil1		Hmgb1
Nedd4		Ngef		Hmgb2
Negr1		Ngfr		Hmgb3
Nek6		Nherf1		Hmgcs1
Nek7		Nherf2		Hmgn1
Neurl1a		Nhlrc2		Hmgn2
Neurog3		Nhs		Hmgn3
Nf1		Nid1		Hmox1
Nf2		Nid2		Hmox2
Nfat5		Nkain4		Hmx1
Nfe2		Nkd1		Hmx2
Nfe2l1		Nkx2-1		Hmx3
Nfe2l2		Nkx2-2		Hnf1b
Nfia		Nkx2-3		Hnrnpa1
Nfib		Nkx2-4		Hnrnpa3
Nfic		Nkx2-5		Hnrnpab
Nfix		Nkx2-6		Hnrnpc
Nfkb1		Nkx3-1		Hnrnpdl
Nfkbia		Nkx3-2		Hnrnpf
Nfkbib		Nme1		Hnrnph3
Nfrkb		Nme2		Hnrnpk
Nfs1		Nme3		Hnrnpl
Ngfr		Nme4		Hnrnpll
Ngp		Nme7		Hnrnpr
Nherf1		Nmt1		Hnrnpul2
Nhlh1		Nnat		Homer1
Nid1		Nnt		Homer2
Nid2		Nog		Homer3
Ninl		Nos3		Homez
Nip7		Notch1		Hoxa2
Nipal3		Notch2		Hoxa9
Nipsnap1		Notch3		Hoxb6
Nit1		Notch4		Hoxc5
Nkx2-3		Notum		Hoxc6
Nkx2-4		Nox4		Hoxc9
Nkx2-5		Npas3		Hoxd3
Nme1		Npepps		Hoxd11
Nme2		Nphp3		Hpcal1
Nme6		Npnt		Hpgds
Nme7		Nppa		Hprt1
Nmnat3		Nppb		Hr
Nmt1		Npr2		Hras
Nmt2		Npr3		Hs3st2
Nnat		Nptx2		Hs6st1
Nnt		Nqo1		Hs6st2
Noa1		Nr0b1		Hs6st3
Noc4l		Nr1d2		Hsd3b4
Nod1		Nr1h4		Hsd3b8
Nop2		Nr1i2		Hsd3b9
Nop56		Nr1i3		Hsd11b1
Nos1		Nr2c1		Hsd17b4
Notch1		Nr2e1		Hsd17b7
Notch2		Nr2f1		Hsd17b10
Notch3		Nr2f2		Hsd17b11
Notch4		Nr2f6		Hsd17b12
Npepps		Nr3c1		Hsf1
Nphs2		Nr4a2		Hsf2
Npnt		Nr5a1		Hsf2bp
Nprl2		Nras		Hsf3
Nr0b1		Nrg1		Hsf4
Nr1d2		Nrg2		Hsp90aa1
Nr2c1		Nrip1		Hsp90ab1
Nr2f1		Nrip2		Hspa4l
Nr2f2		Nrk		Hspa5
Nr2f6		Nrm		Hspa8
Nr3c1		Nrp1		Hspa12b
Nr5a2		Nrp2		Hspa13
Nr6a1		Nsd2		Hspb6
Nras		Nsdhl		Hspb7
Nrg1		Nsmce3		Hspb8
Nrip1		Nsun2		Hspd1
Nrm		Nsun3		Hspg2
Nrn1		Nsun4		Htr1b
Nrtn		Nsun5		Htr1d
Nsd2		Nsun6		Htr1f
Nsdhl		Nsun7		Htr2a
Nsun2		Nt5c3		Htr2b
Nsun3		Ntan1		Htr4
Nsun4		Ntf3		Htr5a
Nsun5		Ntm		Htr5b
Nt5c3		Ntn1		Htra1
Ntf3		Ntn4		Htt
Ntm		Ntrk3		Hunk
Ntrk1		Nts		Hyal3
Ntrk3		Nuak1		Hyls1
Nudc		Nucb1		Iars1
Nudt5		Nucb2		Iars2
Nudt9		Nudc		Ica1
Nudt19		Nudt2		Icam2
Nudt21		Nudt5		Icmt
Nuf2		Nudt21		Icosl
Nup43		Nuf2		Id1
Nup210		Numb		Id2
Nupr1		Nup210		Id3
Nusap1		Nusap1		Id4
Nutf2		Nxpe2		Ide
Nxpe2		Oat		Idh1
Oat		Obox1		Idh2
Ociad1		Ociad1		Idh3a
Ocln		Odc1		Idh3g
Odc1		Ofcc1		Idi1
Oga		Ogdh		Ids
Ogdh		Ogdhl		Ier3ip1
Ogt		Ogt		Ier5
Oma1		Olfml3		Ier5l
Onecut1		Olig2		Ifi44l
Onecut2		Olr1		Ifit1
Opa1		Onecut1		Ifit3
Optn		Opa1		Ifitm1
Or52a5		Oprd1		Ifnar1
Or52a5b		Oprk1		Ifnar2
Orc1		Oprl1		Ifngr2
Orc2		Optn		Ift140
Orc5		Or8b9		Iftap
Orc6		Or9m2		Igdcc3
[truncated: 2,773 more rows]
