# Supplementary material for: Uncovering codon usage patterns during murine embryogenesis and tissue-specific developmental diseases
Source: Front Genet. 2025 May 26;16:1554773. doi: 10.3389/fgene.2025.1554773 (PMC12146342; doi:10.3389/fgene.2025.1554773)
Supplement: Supplementary file 8 [file Table5.xlsx]

## Sheet: Liver
	Principal Components
Strain	PC1	PC2	PC3
C57BL/6	All codons (0.2, -0.2)	Asn, Ile, and Phe	-
C57BL/6J	All codons (0.2, -0.2)	Arg, Asn, and Pro	Ile, Phe, and Tyr
CD-1	All codons (0.2, -0.2)	Asn, Gln and Val	Ile, Phe, and Tyr
A ‘heavy’ amino acid contributor is defined by more than one synonymous codon with a loading value of >= 0.2 or <= -0.2.
Table S5: Healthy vs Diseased Weighted Codons that Heavily Contribute to each Principal Component (PC).

## Sheet: Eye
	Principal Components
Strain	PC1	PC2	PC3	PC4
C57BL/6	All codons (0.2, -0.2)	Arg, Gly, Leu, and Pro	Gln, Gly, Pro, and Ser	-
C57BL/6J	Cys, His, and Phe	Glu, Gly, and Lys	Ala, Arg, Gly, and Ser	-
C57BL/6N	All codons (0.2, -0.2)	-	-	-

## Sheet: Heart
	Principal Components
Strain	PC1	PC2	PC3	PC4	PC5
C57BL/6	All codons (0.2, -0.2)	Cys, His, and Tyr	-	-	-
C57BL/6J	All codons (0.2, -0.2)	Pro and Ser	Arg and Leu	-	-
CD-1	Asp and Glu	Gly, Leu, and Pro	Ser, Thr, and Val	Arg and Leu	-
