# Supplementary material for: Uncovering codon usage patterns during murine embryogenesis and tissue-specific developmental diseases
Source: Front Genet. 2025 May 26;16:1554773. doi: 10.3389/fgene.2025.1554773 (PMC12146342; doi:10.3389/fgene.2025.1554773)
Supplement: Supplementary file 9 [file Table7.xlsx]

## Sheet: Liver
Strain	Metric	KMeans	DBSCAN	Agglomerative	Spectral		Table S7: Healthy vs Diseased Weighted Cluster Evaluation Measurements.
C57BL/6	Number of clusters	2	1	2	2
	Homogeneity	0.81	1	1	0.81
	Completeness	0.81	1	1	0.81
	V-measure	0.81	1	1	0.81
	Adjusted rand index	0.86	1	1	0.86
	Adjusted mutual info	0.81	1	1	0.81
C57BL/6J	Number of clusters	3	0	2	3
	Homogeneity	1	-	1	1
	Completeness	0.67	-	1	0.67
	V-measure	0.8	-	1	0.8
	Adjusted rand index	0.73	-	1	0.73
	Adjusted mutual info	0.78	-	1	0.78
CD-1	Number of clusters	4	1	2	4
	Homogeneity	0.67	1	0.6	0.67
	Completeness	0.35	1	0.62	0.36
	V-measure	0.46	1	0.61	0.47
	Adjusted rand index	0.32	1	0.62	0.33
	Adjusted mutual info	0.45	1	0.6	0.46

## Sheet: Eye
Strain	Metric	KMeans	DBSCAN	Agglomerative	Spectral
C57BL/6	Number of clusters	4	4	2	4
	Overlap of sample type	Yes	No	Yes	Yes
	Homogeneity	0.67	1	0.8	0.6
	Completeness	0.44	0.5	0.8	0.3
	V-measure	0.53	0.67	0.8	0.4
	Adjusted rand index	0.63	0.5	0.85	0.3
	Adjusted mutual info	0.53	0.66	0.8	0.39
C57BL/6J	Number of clusters	5	-	2	5
	Overlap of sample type	Yes	-	Yes	Yes
	Homogeneity	0.72	-	0.76	0.74
	Completeness	0.32	-	0.76	0.33
	V-measure	0.44	-	0.76	0.45
	Adjusted rand index	0.29	-	0.8	0.3
	Adjusted mutual info	0.37	-	0.75	0.38
C57BL/6N	Number of clusters	4	-	2	4
	Overlap of sample type	Yes	-	Yes	Yes
	Homogeneity	0.66	-	0.55	0.66
	Completeness	0.34	-	0.57	0.34
	V-measure	0.45	-	0.56	0.45
	Adjusted rand index	0.27	-	0.54	0.27
	Adjusted mutual info	0.41	-	0.55	0.41

## Sheet: Heart
Strain	Metric	KMeans	Agglomerative	Spectral
C57BL/6	Number of clusters	4	2	4
	Overlap of sample type	No	Yes	No
	Homogeneity	1	0.77	1
	Completeness	0.5	0.78	0.5
	V-measure	0.67	0.78	0.67
	Adjusted rand index	0.47	0.82	0.47
	Adjusted mutual info	0.64	0.77	0.64
C57BL/6J	Number of clusters	4	3	4
	Overlap of sample type	Yes	Yes	Yes
	Homogeneity	0.62	0.82	0.44
	Completeness	0.31	0.58	0.23
	V-measure	0.44	0.68	0.3
	Adjusted rand index	0.38	0.68	0.2
	Adjusted mutual info	0.42	0.67	0.28
CD-1	Number of clusters	4	4	4
	Overlap of sample type	Yes	No	Yes
	Homogeneity	0.85	1	0.77
	Completeness	0.54	0.61	0.39
	V-measure	0.66	0.76	0.52
	Adjusted rand index	0.65	0.71	0.42
	Adjusted mutual info	0.65	0.75	0.51
