# Supplementary material for: Uncovering codon usage patterns during murine embryogenesis and tissue-specific developmental diseases
Source: Front Genet. 2025 May 26;16:1554773. doi: 10.3389/fgene.2025.1554773 (PMC12146342; doi:10.3389/fgene.2025.1554773)
Supplement: Supplementary file 10 [file Table8.xlsx]

## Sheet: C57BL6_NLW_DLW
Codon	stat	pvalues	alpha	adjusted_pvalues	bonf_alpha			Healthy (Normal) Liver Weighted (NLW) vs Diseased Liver Weighed (DLW) samples
Ala:GCA	196	0	0.05	0	0.05			Healthy (Normal) Eye Weighed (NEW) vs Diseased Eye Weighted (DEW) samples
GCC	3	0	0.05	0	0.05			Healthy (Normal) Heart Weighted (NHW) vs Diseased Heart Weighted (DHW) samples
GCG	196	0	0.05	0	0.05
GCT	0	0	0.05	0	0.05
Arg:AGA	132	0.125092	0.05	0.125092	0.05		Table Legend:
AGG	14.5	3.4e-05	0.05	3.4e-05	0.05		Comparisons are shown as their acronym. For examle, healthy (normal) liver weighted samples are labelled as ‘NLW’ and diseased liver weighted samples are labelled as ‘DLW’.
CGA	196	0	0.05	0	0.05		stat' is the statistic value.
CGC	178	7.8e-05	0.05	7.8e-05	0.05		pvalues' are the raw pvalues.
CGG	193.5	0	0.05	0	0.05		alpha' are the raw alpha values.
CGT	4	1e-06	0.05	1e-06	0.05		new_pvalues' are the adjusted pvalues.
Asn:AAC	163	0.002078	0.05	0.002078	0.05		bonf_alpha' are the adjusted alpha values.
AAT	34.5	0.002963	0.05	0.002963	0.05
Asp:GAC	196	0	0.05	0	0.05
GAT	0	0	0.05	0	0.05		Table S8: Healthy vs Diseased Weighted Codon Significance Values between Clusters.
Cys:TGC	37	0.004162	0.05	0.004162	0.05
TGT	159	0.004162	0.05	0.004162	0.05
Gln:GAA	14	2.5e-05	0.05	2.5e-05	0.05
GAG	183	1.9e-05	0.05	1.9e-05	0.05
Glu:CAA	179	6e-05	0.05	6e-05	0.05
CAG	17	6e-05	0.05	6e-05	0.05
Gly:GGA	190	1e-06	0.05	1e-06	0.05
GGC	3	0	0.05	0	0.05
GGG	196	0	0.05	0	0.05
GGT	0	0	0.05	0	0.05
His:CAC	0	0	0.05	0	0.05
CAT	196	0	0.05	0	0.05
Ile:ATA	17.5	7.8e-05	0.05	7.8e-05	0.05
ATC	153	0.0106	0.05	0.0106	0.05
ATT	97.5	1	0.05	1	0.05
Leu:CTA	168	0.000794	0.05	0.000794	0.05
CTC	181.5	3.4e-05	0.05	3.4e-05	0.05
CTG	0	0	0.05	0	0.05
CTT	196	0	0.05	0	0.05
TTA	181.5	3.4e-05	0.05	3.4e-05	0.05
TTG	189.5	2e-06	0.05	2e-06	0.05
Lys:AAA	196	0	0.05	0	0.05
AAG	0	0	0.05	0	0.05
Phe:TTC	178	7.8e-05	0.05	7.8e-05	0.05
TTT	18	7.8e-05	0.05	7.8e-05	0.05
Pro:CCA	180	4.5e-05	0.05	4.5e-05	0.05
CCC	1	0	0.05	0	0.05
CCG	196	0	0.05	0	0.05
CCT	12	1.4e-05	0.05	1.4e-05	0.05
Ser:AGC	0	0	0.05	0	0.05
AGT	196	0	0.05	0	0.05
TCA	196	0	0.05	0	0.05
TCC	195	0	0.05	0	0.05
TCG	195	0	0.05	0	0.05
TCT	0	0	0.05	0	0.05
Thr:ACA	192.5	1e-06	0.05	1e-06	0.05
ACC	4	1e-06	0.05	1e-06	0.05
ACG	171	0.000421	0.05	0.000421	0.05
ACT	163.5	0.002078	0.05	0.002078	0.05
Tyr:TAC	19	0.000101	0.05	0.000101	0.05
TAT	177	0.000101	0.05	0.000101	0.05
Val:GTA	193	0	0.05	0	0.05
GTC	193	0	0.05	0	0.05
GTG	0	0	0.05	0	0.05
GTT	139	0.062042	0.05	0.062042	0.05

## Sheet: C57BL6J_NLW_DLW
Codon	stat	pvalues	alpha	adjusted_pvalues	bonf_alpha
Ala:GCA	49	0.000583	0.05	0.000583	0.05
GCC	1	0.001166	0.05	0.001166	0.05
GCG	39	0.072844	0.05	0.072844	0.05
GCT	0	0.000583	0.05	0.000583	0.05
Arg:AGA	39	0.072844	0.05	0.072844	0.05
AGG	17	0.382867	0.05	0.382867	0.05
CGA	47	0.002331	0.05	0.002331	0.05
CGC	2.5	0.004079	0.05	0.004079	0.05
CGG	23.5	1	0.05	1	0.05
CGT	0	0.000583	0.05	0.000583	0.05
Asn:AAC	4	0.006993	0.05	0.006993	0.05
AAT	45	0.006993	0.05	0.006993	0.05
Asp:GAC	49	0.000583	0.05	0.000583	0.05
GAT	0	0.000583	0.05	0.000583	0.05
Cys:TGC	0	0.000583	0.05	0.000583	0.05
TGT	49	0.000583	0.05	0.000583	0.05
Gln:GAA	44	0.011072	0.05	0.011072	0.05
GAG	5	0.011072	0.05	0.011072	0.05
Glu:CAA	49	0.000583	0.05	0.000583	0.05
CAG	0	0.000583	0.05	0.000583	0.05
Gly:GGA	43	0.017483	0.05	0.017483	0.05
GGC	0	0.000583	0.05	0.000583	0.05
GGG	49	0.000583	0.05	0.000583	0.05
GGT	0	0.000583	0.05	0.000583	0.05
His:CAC	1	0.001166	0.05	0.001166	0.05
CAT	48	0.001166	0.05	0.001166	0.05
Ile:ATA	38	0.097319	0.05	0.097319	0.05
ATC	5	0.011072	0.05	0.011072	0.05
ATT	30.5	0.534965	0.05	0.534965	0.05
Leu:CTA	46.5	0.004079	0.05	0.004079	0.05
CTC	48	0.001166	0.05	0.001166	0.05
CTG	0	0.000583	0.05	0.000583	0.05
CTT	46	0.004079	0.05	0.004079	0.05
TTA	49	0.000583	0.05	0.000583	0.05
TTG	48	0.001166	0.05	0.001166	0.05
Lys:AAA	48	0.001166	0.05	0.001166	0.05
AAG	1	0.001166	0.05	0.001166	0.05
Phe:TTC	40.5	0.05303	0.05	0.05303	0.05
TTT	7.5	0.037879	0.05	0.037879	0.05
Pro:CCA	39	0.072844	0.05	0.072844	0.05
CCC	0	0.000583	0.05	0.000583	0.05
CCG	29.5	0.620047	0.05	0.620047	0.05
CCT	44.5	0.011072	0.05	0.011072	0.05
Ser:AGC	0	0.000583	0.05	0.000583	0.05
AGT	49	0.000583	0.05	0.000583	0.05
TCA	49	0.000583	0.05	0.000583	0.05
TCC	4.5	0.011072	0.05	0.011072	0.05
TCG	4	0.006993	0.05	0.006993	0.05
TCT	17	0.382867	0.05	0.382867	0.05
Thr:ACA	49	0.000583	0.05	0.000583	0.05
ACC	0	0.000583	0.05	0.000583	0.05
ACG	0	0.000583	0.05	0.000583	0.05
ACT	49	0.000583	0.05	0.000583	0.05
Tyr:TAC	15.5	0.317599	0.05	0.317599	0.05
TAT	35.5	0.208625	0.05	0.208625	0.05
Val:GTA	48.5	0.001166	0.05	0.001166	0.05
GTC	11.5	0.128205	0.05	0.128205	0.05
GTG	0	0.000583	0.05	0.000583	0.05
GTT	49	0.000583	0.05	0.000583	0.05

## Sheet: CD1_NLW_DLW
Codon	stat	pvalues	alpha	adjusted_pvalues	bonf_alpha
Ala:GCA	1218.5	0	0.05	0	0.05
GCC	257	2e-06	0.05	2e-06	0.05
GCG	1189	0	0.05	0	0.05
GCT	81.5	0	0.05	0	0.05
Arg:AGA	935	0.008793	0.05	0.008793	0.05
AGG	513	0.060416	0.05	0.060416	0.05
CGA	970.5	0.002617	0.05	0.002617	0.05
CGC	831.5	0.136065	0.05	0.136065	0.05
CGG	1189	0	0.05	0	0.05
CGT	98	0	0.05	0	0.05
Asn:AAC	1068	3.5e-05	0.05	3.5e-05	0.05
AAT	312.5	3.7e-05	0.05	3.7e-05	0.05
Asp:GAC	1324	0	0.05	0	0.05
GAT	55	0	0.05	0	0.05
Cys:TGC	158.5	0	0.05	0	0.05
TGT	1219	0	0.05	0	0.05
Gln:GAA	350	0.000222	0.05	0.000222	0.05
GAG	1029.5	0.000232	0.05	0.000232	0.05
Glu:CAA	1192.5	0	0.05	0	0.05
CAG	185	0	0.05	0	0.05
Gly:GGA	1221.5	0	0.05	0	0.05
GGC	416	0.003258	0.05	0.003258	0.05
GGG	1121	2e-06	0.05	2e-06	0.05
GGT	92.5	0	0.05	0	0.05
His:CAC	368.5	0.000513	0.05	0.000513	0.05
CAT	1008.5	0.000582	0.05	0.000582	0.05
Ile:ATA	327.5	7.8e-05	0.05	7.8e-05	0.05
ATC	1178	0	0.05	0	0.05
ATT	169.5	0	0.05	0	0.05
Leu:CTA	930.5	0.010323	0.05	0.010323	0.05
CTC	1033	0.000193	0.05	0.000193	0.05
CTG	254	1e-06	0.05	1e-06	0.05
CTT	1320	0	0.05	0	0.05
TTA	1113.5	3e-06	0.05	3e-06	0.05
TTG	1008.5	0.000582	0.05	0.000582	0.05
Lys:AAA	1373.5	0	0.05	0	0.05
AAG	7.5	0	0.05	0	0.05
Phe:TTC	1159	0	0.05	0	0.05
TTT	218.5	0	0.05	0	0.05
Pro:CCA	1133.5	1e-06	0.05	1e-06	0.05
CCC	77.5	0	0.05	0	0.05
CCG	1171	0	0.05	0	0.05
CCT	207	0	0.05	0	0.05
Ser:AGC	124.5	0	0.05	0	0.05
AGT	1096.5	8e-06	0.05	8e-06	0.05
TCA	1317.5	0	0.05	0	0.05
TCC	1255.5	0	0.05	0	0.05
TCG	1310	0	0.05	0	0.05
TCT	62.5	0	0.05	0	0.05
Thr:ACA	1031.5	0.000212	0.05	0.000212	0.05
ACC	368	0.000491	0.05	0.000491	0.05
ACG	768.5	0.412485	0.05	0.412485	0.05
ACT	1035	0.000176	0.05	0.000176	0.05
Tyr:TAC	386	0.001037	0.05	0.001037	0.05
TAT	979	0.001867	0.05	0.001867	0.05
Val:GTA	1172	0	0.05	0	0.05
GTC	1369	0	0.05	0	0.05
GTG	355	0.000278	0.05	0.000278	0.05
GTT	876.5	0.048259	0.05	0.048259	0.05

## Sheet: C57BL6J_NEW_DEW
Codon	stat	pvalues	alpha	adjusted_pvalues	bonf_alpha
Ala:GCA	32.5	0.229864	0.05	0.229864	0.05		Dendrogram results
GCC	82	0.012467	0.05	0.012467	0.05
GCG	64.5	0.294725	0.05	0.294725	0.05
GCT	20	0.025054	0.05	0.025054	0.05
Arg:AGA	30.5	0.175411	0.05	0.175411	0.05
AGG	35.5	0.331162	0.05	0.331162	0.05
CGA	81	0.015897	0.05	0.015897	0.05
CGC	54.5	0.766432	0.05	0.766432	0.05
CGG	36	0.331162	0.05	0.331162	0.05
CGT	47	0.881984	0.05	0.881984	0.05
Asn:AAC	37	0.370219	0.05	0.370219	0.05
AAT	70.5	0.130805	0.05	0.130805	0.05
Asp:GAC	92.5	0.000536	0.05	0.000536	0.05
GAT	7	0.000536	0.05	0.000536	0.05
Cys:TGC	94	0.000226	0.05	0.000226	0.05
TGT	4	0.000143	0.05	0.000143	0.05
Gln:GAA	46	0.823756	0.05	0.823756	0.05
GAG	47	0.881984	0.05	0.881984	0.05
Glu:CAA	34.5	0.294725	0.05	0.294725	0.05
CAG	54.5	0.766432	0.05	0.766432	0.05
Gly:GGA	94.5	0.000226	0.05	0.000226	0.05
GGC	16	0.009693	0.05	0.009693	0.05
GGG	7.5	0.000798	0.05	0.000798	0.05
GGT	57.5	0.602679	0.05	0.602679	0.05
His:CAC	95.5	0.000143	0.05	0.000143	0.05
CAT	5	0.000226	0.05	0.000226	0.05
Ile:ATA	88.5	0.002286	0.05	0.002286	0.05
ATC	74.5	0.067445	0.05	0.067445	0.05
ATT	2.5	8.3e-05	0.05	8.3e-05	0.05
Leu:CTA	79	0.025054	0.05	0.025054	0.05
CTC	98	2.4e-05	0.05	2.4e-05	0.05
CTG	8	0.000798	0.05	0.000798	0.05
CTT	71	0.111943	0.05	0.111943	0.05
TTA	12	0.003144	0.05	0.003144	0.05
TTG	58	0.551631	0.05	0.551631	0.05
Lys:AAA	62	0.370219	0.05	0.370219	0.05
AAG	37	0.370219	0.05	0.370219	0.05
Phe:TTC	94	0.000226	0.05	0.000226	0.05
TTT	5	0.000226	0.05	0.000226	0.05
Pro:CCA	27.5	0.111943	0.05	0.111943	0.05
CCC	30	0.151941	0.05	0.151941	0.05
CCG	35	0.294725	0.05	0.294725	0.05
CCT	89.5	0.001643	0.05	0.001643	0.05
Ser:AGC	93	0.000357	0.05	0.000357	0.05
AGT	8	0.000798	0.05	0.000798	0.05
TCA	54	0.766432	0.05	0.766432	0.05
TCC	25	0.067445	0.05	0.067445	0.05
TCG	48	0.940843	0.05	0.940843	0.05
TCT	62	0.370219	0.05	0.370219	0.05
Thr:ACA	21.5	0.038128	0.05	0.038128	0.05
ACC	88	0.002286	0.05	0.002286	0.05
ACG	36.5	0.370219	0.05	0.370219	0.05
ACT	7.5	0.000798	0.05	0.000798	0.05
Tyr:TAC	83	0.009693	0.05	0.009693	0.05
TAT	13	0.004239	0.05	0.004239	0.05
Val:GTA	9	0.001155	0.05	0.001155	0.05
GTC	93.5	0.000357	0.05	0.000357	0.05
GTG	61.5	0.411896	0.05	0.411896	0.05
GTT	18.5	0.02004	0.05	0.02004	0.05

## Sheet: C57BL6N_NEW_DEW
Codon	stat	pvalues	alpha	adjusted_pvalues	bonf_alpha
Ala:GCA	66.5	1	0.05	1	0.05		Dendrogram results
GCC	74	0.725852	0.05	0.725852	0.05
GCG	61.5	0.770185	0.05	0.770185	0.05
GCT	52	0.378558	0.05	0.378558	0.05
Arg:AGA	48	0.263112	0.05	0.263112	0.05
AGG	60	0.682384	0.05	0.682384	0.05
CGA	77.5	0.598522	0.05	0.598522	0.05
CGC	63	0.815253	0.05	0.815253	0.05
CGG	81.5	0.445986	0.05	0.445986	0.05
CGT	77.5	0.598522	0.05	0.598522	0.05
Asn:AAC	24	0.008255	0.05	0.008255	0.05
AAT	111	0.008255	0.05	0.008255	0.05
Asp:GAC	69.5	0.953436	0.05	0.953436	0.05
GAT	65.5	0.953436	0.05	0.953436	0.05
Cys:TGC	66	0.953436	0.05	0.953436	0.05
TGT	70	0.907021	0.05	0.907021	0.05
Gln:GAA	70	0.907021	0.05	0.907021	0.05
GAG	65	0.907021	0.05	0.907021	0.05
Glu:CAA	106	0.021175	0.05	0.021175	0.05
CAG	29	0.021175	0.05	0.021175	0.05
Gly:GGA	75	0.682384	0.05	0.682384	0.05
GGC	57	0.558351	0.05	0.558351	0.05
GGG	58	0.598522	0.05	0.598522	0.05
GGT	76	0.639899	0.05	0.639899	0.05
His:CAC	66	0.953436	0.05	0.953436	0.05
CAT	69	0.953436	0.05	0.953436	0.05
Ile:ATA	34.5	0.055163	0.05	0.055163	0.05
ATC	65	0.907021	0.05	0.907021	0.05
ATT	77	0.598522	0.05	0.598522	0.05
Leu:CTA	51	0.347236	0.05	0.347236	0.05
CTC	74	0.725852	0.05	0.725852	0.05
CTG	53.5	0.445986	0.05	0.445986	0.05
CTT	92	0.155259	0.05	0.155259	0.05
TTA	47.5	0.263112	0.05	0.263112	0.05
TTG	113	0.005424	0.05	0.005424	0.05
Lys:AAA	67	1	0.05	1	0.05
AAG	67.5	1	0.05	1	0.05
Phe:TTC	69	0.953436	0.05	0.953436	0.05
TTT	66	0.953436	0.05	0.953436	0.05
Pro:CCA	59	0.639899	0.05	0.639899	0.05
CCC	67	1	0.05	1	0.05
CCG	72	0.815253	0.05	0.815253	0.05
CCT	76	0.639899	0.05	0.639899	0.05
Ser:AGC	51	0.347236	0.05	0.347236	0.05
AGT	45	0.193693	0.05	0.193693	0.05
TCA	63.5	0.860912	0.05	0.860912	0.05
TCC	86	0.289503	0.05	0.289503	0.05
TCG	73.5	0.770185	0.05	0.770185	0.05
TCT	72	0.815253	0.05	0.815253	0.05
Thr:ACA	47.5	0.263112	0.05	0.263112	0.05
ACC	77	0.598522	0.05	0.598522	0.05
ACG	57	0.558351	0.05	0.558351	0.05
ACT	81	0.445986	0.05	0.445986	0.05
Tyr:TAC	63	0.815253	0.05	0.815253	0.05
TAT	72	0.815253	0.05	0.815253	0.05
Val:GTA	59	0.639899	0.05	0.639899	0.05
GTC	81.5	0.445986	0.05	0.445986	0.05
GTG	56.5	0.558351	0.05	0.558351	0.05
GTT	61	0.725852	0.05	0.725852	0.05

## Sheet: C57BL6 0_1
Codon	stat	pvalues	alpha	adjusted_pvalues	bonf_alpha
Ala:GCA	673	0.028282	0.05	0.028282	0.05
GCC	156	1e-06	0.05	1e-06	0.05		DBSCAN results for cluster 0 and 1.
GCG	276	0.002202	0.05	0.002202	0.05
GCT	885	0	0.05	0	0.05
Arg:AGA	648.5	0.063285	0.05	0.063285	0.05
AGG	678.5	0.023755	0.05	0.023755	0.05
CGA	259	0.000958	0.05	0.000958	0.05
CGC	386.5	0.12091	0.05	0.12091	0.05
CGG	424	0.287741	0.05	0.287741	0.05
CGT	831.5	8e-06	0.05	8e-06	0.05
Asn:AAC	118	0	0.05	0	0.05
AAT	881	0	0.05	0	0.05
Asp:GAC	151	1e-06	0.05	1e-06	0.05
GAT	866	0	0.05	0	0.05
Cys:TGC	390	0.130735	0.05	0.130735	0.05
TGT	676	0.025486	0.05	0.025486	0.05
Gln:GAA	721.5	0.004351	0.05	0.004351	0.05
GAG	242.5	0.000412	0.05	0.000412	0.05
Glu:CAA	663	0.03955	0.05	0.03955	0.05
CAG	369	0.073392	0.05	0.073392	0.05
Gly:GGA	586	0.299805	0.05	0.299805	0.05
GGC	418	0.253504	0.05	0.253504	0.05
GGG	392	0.137616	0.05	0.137616	0.05
GGT	506	1	0.05	1	0.05
His:CAC	188	1.3e-05	0.05	1.3e-05	0.05
CAT	718	0.004957	0.05	0.004957	0.05
Ile:ATA	890	0	0.05	0	0.05
ATC	252	0.000667	0.05	0.000667	0.05
ATT	729	0.003045	0.05	0.003045	0.05
Leu:CTA	620	0.137616	0.05	0.137616	0.05
CTC	201.5	3.5e-05	0.05	3.5e-05	0.05
CTG	444.5	0.430636	0.05	0.430636	0.05
CTT	617	0.148447	0.05	0.148447	0.05
TTA	566	0.438318	0.05	0.438318	0.05
TTG	656.5	0.04949	0.05	0.04949	0.05
Lys:AAA	848	2e-06	0.05	2e-06	0.05
AAG	166	3e-06	0.05	3e-06	0.05
Phe:TTC	170	4e-06	0.05	4e-06	0.05
TTT	758	0.000741	0.05	0.000741	0.05
Pro:CCA	663	0.03955	0.05	0.03955	0.05
CCC	290	0.004164	0.05	0.004164	0.05
CCG	318	0.013176	0.05	0.013176	0.05
CCT	459.5	0.55366	0.05	0.55366	0.05
Ser:AGC	230	0.000197	0.05	0.000197	0.05
AGT	842.5	4e-06	0.05	4e-06	0.05
TCA	630	0.10581	0.05	0.10581	0.05
TCC	312	0.010431	0.05	0.010431	0.05
TCG	352	0.043585	0.05	0.043585	0.05
TCT	506	1	0.05	1	0.05
Thr:ACA	804	5.1e-05	0.05	5.1e-05	0.05
ACC	169	3e-06	0.05	3e-06	0.05
ACG	536	0.701124	0.05	0.701124	0.05
ACT	758.5	0.000741	0.05	0.000741	0.05
Tyr:TAC	231	0.000209	0.05	0.000209	0.05
TAT	754	0.000911	0.05	0.000911	0.05
Val:GTA	743	0.001576	0.05	0.001576	0.05
GTC	167.5	3e-06	0.05	3e-06	0.05
GTG	403	0.18045	0.05	0.18045	0.05
GTT	827	1.1e-05	0.05	1.1e-05	0.05

## Sheet: C57BL6 0_2
Codon	stat	pvalues	alpha	adjusted_pvalues	bonf_alpha
Ala:GCA	292	0.768999	0.05	0.768999	0.05
GCC	136	0.006257	0.05	0.006257	0.05		DBSCAN results for cluster 0 and 2.
GCG	100	0.000425	0.05	0.000425	0.05
GCT	489	9e-06	0.05	9e-06	0.05
Arg:AGA	206	0.184631	0.05	0.184631	0.05
AGG	292	0.768999	0.05	0.768999	0.05
CGA	183	0.075602	0.05	0.075602	0.05
CGC	326	0.346601	0.05	0.346601	0.05
CGG	275	0.992444	0.05	0.992444	0.05
CGT	466	0.000116	0.05	0.000116	0.05
Asn:AAC	149	0.013789	0.05	0.013789	0.05
AAT	399	0.017294	0.05	0.017294	0.05
Asp:GAC	150	0.014602	0.05	0.014602	0.05
GAT	408	0.010277	0.05	0.010277	0.05
Cys:TGC	210	0.211605	0.05	0.211605	0.05
TGT	376	0.0554	0.05	0.0554	0.05
Gln:GAA	236	0.453261	0.05	0.453261	0.05
GAG	320	0.40859	0.05	0.40859	0.05
Glu:CAA	216	0.257069	0.05	0.257069	0.05
CAG	336	0.257069	0.05	0.257069	0.05
Gly:GGA	0	0	0.05	0	0.05
GGC	412	0.008052	0.05	0.008052	0.05
GGG	442	0.000975	0.05	0.000975	0.05
GGT	196	0.128188	0.05	0.128188	0.05
His:CAC	240	0.50049	0.05	0.50049	0.05
CAT	312	0.50049	0.05	0.50049	0.05
Ile:ATA	480	2.7e-05	0.05	2.7e-05	0.05
ATC	158	0.022716	0.05	0.022716	0.05
ATT	384	0.037911	0.05	0.037911	0.05
Leu:CTA	321	0.397835	0.05	0.397835	0.05
CTC	144	0.010277	0.05	0.010277	0.05
CTG	482	2.1e-05	0.05	2.1e-05	0.05
CTT	102.5	0.000549	0.05	0.000549	0.05
TTA	300	0.655971	0.05	0.655971	0.05
TTG	341.5	0.21876	0.05	0.21876	0.05
Lys:AAA	444	0.00083	0.05	0.00083	0.05
AAG	116	0.001552	0.05	0.001552	0.05
Phe:TTC	250	0.628761	0.05	0.628761	0.05
TTT	298	0.683632	0.05	0.683632	0.05
Pro:CCA	207	0.19113	0.05	0.19113	0.05
CCC	510	0	0.05	0	0.05
CCG	217	0.265243	0.05	0.265243	0.05
CCT	51	2e-06	0.05	2e-06	0.05
Ser:AGC	129	0.003943	0.05	0.003943	0.05
AGT	332.5	0.290802	0.05	0.290802	0.05
TCA	312	0.50049	0.05	0.50049	0.05
TCC	172	0.045979	0.05	0.045979	0.05
TCG	427	0.002991	0.05	0.002991	0.05
TCT	132	0.004821	0.05	0.004821	0.05
Thr:ACA	318	0.430598	0.05	0.430598	0.05
ACC	271	0.932076	0.05	0.932076	0.05
ACG	277.5	0.992444	0.05	0.992444	0.05
ACT	246	0.575817	0.05	0.575817	0.05
Tyr:TAC	198	0.138278	0.05	0.138278	0.05
TAT	312	0.50049	0.05	0.50049	0.05
Val:GTA	447	0.000649	0.05	0.000649	0.05
GTC	224	0.327308	0.05	0.327308	0.05
GTG	269	0.902012	0.05	0.902012	0.05
GTT	260.5	0.783528	0.05	0.783528	0.05

## Sheet: C57BL6 0_3
Codon	stat	pvalues	alpha	adjusted_pvalues	bonf_alpha
Ala:GCA	255	0.000158	0.05	0.000158	0.05
GCC	810	0.001161	0.05	0.001161	0.05		DBSCAN results for cluster 0 and 3.
GCG	457	0.244233	0.05	0.244233	0.05
GCT	219	1.8e-05	0.05	1.8e-05	0.05
Arg:AGA	589	0.653801	0.05	0.653801	0.05
AGG	359	0.016466	0.05	0.016466	0.05
CGA	1006	0	0.05	0	0.05
CGC	625	0.372318	0.05	0.372318	0.05
CGG	367	0.021679	0.05	0.021679	0.05
CGT	141	0	0.05	0	0.05
Asn:AAC	672	0.140067	0.05	0.140067	0.05
AAT	454	0.229479	0.05	0.229479	0.05
Asp:GAC	816	0.000873	0.05	0.000873	0.05
GAT	288	0.000873	0.05	0.000873	0.05
Cys:TGC	948	0	0.05	0	0.05
TGT	156	0	0.05	0	0.05
Gln:GAA	474	0.340116	0.05	0.340116	0.05
GAG	662	0.176734	0.05	0.176734	0.05
Glu:CAA	522	0.717043	0.05	0.717043	0.05
CAG	586	0.680637	0.05	0.680637	0.05
Gly:GGA	890	1.3e-05	0.05	1.3e-05	0.05
GGC	490	0.449432	0.05	0.449432	0.05
GGG	594	0.610053	0.05	0.610053	0.05
GGT	270	0.000354	0.05	0.000354	0.05
His:CAC	888	1.5e-05	0.05	1.5e-05	0.05
CAT	288	0.000873	0.05	0.000873	0.05
Ile:ATA	10	0	0.05	0	0.05
ATC	925	1e-06	0.05	1e-06	0.05
ATT	372	0.02561	0.05	0.02561	0.05
Leu:CTA	424	0.115137	0.05	0.115137	0.05
CTC	767	0.007309	0.05	0.007309	0.05
CTG	138	0	0.05	0	0.05
CTT	949	0	0.05	0	0.05
TTA	640	0.28117	0.05	0.28117	0.05
TTG	212	1.2e-05	0.05	1.2e-05	0.05
Lys:AAA	396	0.053922	0.05	0.053922	0.05
AAG	740	0.019579	0.05	0.019579	0.05
Phe:TTC	780	0.004346	0.05	0.004346	0.05
TTT	338	0.007598	0.05	0.007598	0.05
Pro:CCA	338	0.007598	0.05	0.007598	0.05
CCC	263	0.000245	0.05	0.000245	0.05
CCG	785	0.00353	0.05	0.00353	0.05
CCT	562	0.907117	0.05	0.907117	0.05
Ser:AGC	1036	0	0.05	0	0.05
AGT	328	0.005117	0.05	0.005117	0.05
TCA	284	0.000718	0.05	0.000718	0.05
TCC	368	0.022421	0.05	0.022421	0.05
TCG	840	0.000258	0.05	0.000258	0.05
TCT	248	0.000107	0.05	0.000107	0.05
Thr:ACA	216	1.5e-05	0.05	1.5e-05	0.05
ACC	744	0.017052	0.05	0.017052	0.05
ACG	552.5	1	0.05	1	0.05
ACT	492	0.464352	0.05	0.464352	0.05
Tyr:TAC	960	0	0.05	0	0.05
TAT	240	6.7e-05	0.05	6.7e-05	0.05
Val:GTA	94	0	0.05	0	0.05
GTC	1060	0	0.05	0	0.05
GTG	622.5	0.392503	0.05	0.392503	0.05
GTT	463	0.275677	0.05	0.275677	0.05

## Sheet: C57BL6 1_2
Codon	stat	pvalues	alpha	adjusted_pvalues	bonf_alpha
Ala:GCA	61.5	0.010723	0.05	0.010723	0.05
GCC	246.5	6e-06	0.05	6e-06	0.05		DBSCAN results for cluster 1 and 2.
GCG	89	0.126927	0.05	0.126927	0.05
GCT	119	0.656965	0.05	0.656965	0.05
Arg:AGA	24	2.4e-05	0.05	2.4e-05	0.05
AGG	74	0.0369	0.05	0.0369	0.05
CGA	156	0.402577	0.05	0.402577	0.05
CGC	254	1e-06	0.05	1e-06	0.05
CGG	167	0.217227	0.05	0.217227	0.05
CGT	154	0.444063	0.05	0.444063	0.05
Asn:AAC	220	0.000998	0.05	0.000998	0.05
AAT	58	0.006712	0.05	0.006712	0.05
Asp:GAC	190	0.0369	0.05	0.0369	0.05
GAT	82	0.074162	0.05	0.074162	0.05
Cys:TGC	134	0.95754	0.05	0.95754	0.05
TGT	129	0.92929	0.05	0.92929	0.05
Gln:GAA	0	0	0.05	0	0.05
GAG	264	0	0.05	0	0.05
Glu:CAA	0	0	0.05	0	0.05
CAG	264	0	0.05	0	0.05
Gly:GGA	0	0	0.05	0	0.05
GGC	264	0	0.05	0	0.05
GGG	263	0	0.05	0	0.05
GGT	20	9e-06	0.05	9e-06	0.05
His:CAC	240	2.4e-05	0.05	2.4e-05	0.05
CAT	40	0.00053	0.05	0.00053	0.05
Ile:ATA	120	0.682894	0.05	0.682894	0.05
ATC	164	0.260516	0.05	0.260516	0.05
ATT	120	0.682894	0.05	0.682894	0.05
Leu:CTA	114	0.533718	0.05	0.533718	0.05
CTC	189	0.040473	0.05	0.040473	0.05
CTG	256	0	0.05	0	0.05
CTT	5.5	0	0.05	0	0.05
TTA	131	0.985841	0.05	0.985841	0.05
TTG	114	0.533718	0.05	0.533718	0.05
Lys:AAA	114	0.533718	0.05	0.533718	0.05
AAG	149	0.557437	0.05	0.557437	0.05
Phe:TTC	264	0	0.05	0	0.05
TTT	0	0	0.05	0	0.05
Pro:CCA	4	0	0.05	0	0.05
CCC	264	0	0.05	0	0.05
CCG	219	0.001162	0.05	0.001162	0.05
CCT	15	2e-06	0.05	2e-06	0.05
Ser:AGC	170	0.179223	0.05	0.179223	0.05
AGT	6	0	0.05	0	0.05
TCA	103	0.309238	0.05	0.309238	0.05
TCC	143	0.709191	0.05	0.709191	0.05
TCG	196	0.020501	0.05	0.020501	0.05
TCT	26	3.8e-05	0.05	3.8e-05	0.05
Thr:ACA	24	2.4e-05	0.05	2.4e-05	0.05
ACC	264	0	0.05	0	0.05
ACG	133.5	0.985841	0.05	0.985841	0.05
ACT	30	8.7e-05	0.05	8.7e-05	0.05
Tyr:TAC	216	0.001802	0.05	0.001802	0.05
TAT	44	0.000998	0.05	0.000998	0.05
Val:GTA	199	0.014944	0.05	0.014944	0.05
GTC	264	0	0.05	0	0.05
GTG	151	0.510503	0.05	0.510503	0.05
GTT	0	0	0.05	0	0.05

## Sheet: C57BL6 1_3
Codon	stat	pvalues	alpha	adjusted_pvalues	bonf_alpha
Ala:GCA	0	0	0.05	0	0.05
GCC	528	0	0.05	0	0.05		DBSCAN results for cluster 1 and 3.
GCG	388.5	0.005797	0.05	0.005797	0.05
GCT	0	0	0.05	0	0.05
Arg:AGA	114	0.000709	0.05	0.000709	0.05
AGG	57	1e-06	0.05	1e-06	0.05
CGA	528	0	0.05	0	0.05
CGC	464	3e-06	0.05	3e-06	0.05
CGG	194	0.127295	0.05	0.127295	0.05
CGT	0	0	0.05	0	0.05
Asn:AAC	528	0	0.05	0	0.05
AAT	0	0	0.05	0	0.05
Asp:GAC	528	0	0.05	0	0.05
GAT	0	0	0.05	0	0.05
Cys:TGC	528	0	0.05	0	0.05
TGT	0	0	0.05	0	0.05
Gln:GAA	0	0	0.05	0	0.05
GAG	528	0	0.05	0	0.05
Glu:CAA	217	0.3097	0.05	0.3097	0.05
CAG	325	0.185213	0.05	0.185213	0.05
Gly:GGA	502	0	0.05	0	0.05
GGC	252	0.802254	0.05	0.802254	0.05
GGG	389	0.005392	0.05	0.005392	0.05
GGT	0	0	0.05	0	0.05
His:CAC	528	0	0.05	0	0.05
CAT	0	0	0.05	0	0.05
Ile:ATA	0	0	0.05	0	0.05
ATC	528	0	0.05	0	0.05
ATT	0	0	0.05	0	0.05
Leu:CTA	154	0.01502	0.05	0.01502	0.05
CTC	528	0	0.05	0	0.05
CTG	32	0	0.05	0	0.05
CTT	528	0	0.05	0	0.05
TTA	352	0.053755	0.05	0.053755	0.05
TTG	0	0	0.05	0	0.05
Lys:AAA	0	0	0.05	0	0.05
AAG	528	0	0.05	0	0.05
Phe:TTC	528	0	0.05	0	0.05
TTT	0	0	0.05	0	0.05
Pro:CCA	16	0	0.05	0	0.05
CCC	201.5	0.177968	0.05	0.177968	0.05
CCG	528	0	0.05	0	0.05
CCT	307	0.353438	0.05	0.353438	0.05
Ser:AGC	528	0	0.05	0	0.05
AGT	0	0	0.05	0	0.05
TCA	32	0	0.05	0	0.05
TCC	296	0.492154	0.05	0.492154	0.05
TCG	408	0.001201	0.05	0.001201	0.05
TCT	34	0	0.05	0	0.05
Thr:ACA	0	0	0.05	0	0.05
ACC	528	0	0.05	0	0.05
ACG	262.5	0.991314	0.05	0.991314	0.05
ACT	60	1e-06	0.05	1e-06	0.05
Tyr:TAC	528	0	0.05	0	0.05
TAT	0	0	0.05	0	0.05
Val:GTA	0	0	0.05	0	0.05
GTC	528	0	0.05	0	0.05
GTG	344.5	0.080369	0.05	0.080369	0.05
GTT	0	0	0.05	0	0.05

[truncated: 11 more sheets: C57BL6 2_3, C57BL6_NHW_DHW, CD1 0_1, CD1 0_2, CD1 0_3, CD1 1_2, CD1 1_3, CD1 2_3, C57BL6J 0_1, C57BL6J 0_2, C57BL6J 1_2]
